# Supplementary material for: Substituents make a difference: 6,6″-modified terpyridine complexes with helix configuration and enhanced emission
Source: Royal Society of Chemistry journal article supplement (doi:10.1039/d2dt04006a), 2023-01-01
Supplement: d2dt04006a1.pdf [file d2dt04006a1.pdf]

Supporting Information for

**Substituents Make a Difference: 6,6''-modified Terpyridine  
Complexes with Helix Configuration and Enhanced Emission**

Fan Fu,<sup>a</sup> Die Liu,<sup>b\*</sup> Lili Zhao,<sup>c</sup> Huili Li,<sup>c</sup> Xinyu Bai,<sup>c</sup> Mingzhao Chen,<sup>c</sup> Zhilong Jiang,<sup>c</sup> Peiyang Su,<sup>c</sup> Wanying Zhong,<sup>c</sup> Yiming Li,<sup>b</sup> Jun He,<sup>a\*</sup> Pingshan Wang<sup>b\*</sup>

<sup>a</sup> School of Chemical Engineering and Light Industry, Guangdong University of Technology, Guangzhou 510006, China.

<sup>b</sup> College of Chemistry and Chemical Engineering, Central South University, Changsha, Hunan-410083, China

<sup>c</sup> Institute of Environmental Research at Greater Bay Area, Guangzhou University, Guangdong-510006, China

**Table of contents**

|                                                                                    |            |
|------------------------------------------------------------------------------------|------------|
| <b>Materials and General Methods.....</b>                                          | <b>S2</b>  |
| <b>NMR of ligands L1 and L2 .....</b>                                              | <b>S4</b>  |
| <b>Synthesis of Complexes L1<sub>2</sub>-M and L2<sub>2</sub>-M.....</b>           | <b>S6</b>  |
| <b>NMR and MS spectra of complexes L1<sub>2</sub>-M and L2<sub>2</sub>-M .....</b> | <b>S7</b>  |
| <b>Crystal structure.....</b>                                                      | <b>S18</b> |
| <b>Photophysical properties.....</b>                                               | <b>S32</b> |
| <b>Density Functional Theory (DFT) Calculation .....</b>                           | <b>S53</b> |
| <b>Reference .....</b>                                                             | <b>S56</b> |

## Materials and General Methods

Absorption spectra were measured with Hitachi (model U-3010) UV-Vis spectrophotometer in a 1-cm quartz cell. Emission spectra were measured with Edinburgh (FS5) fluorescence spectrophotometer in a 1-cm quartz cell under the following conditions: EX Slit, 5.0 nm; EM Slit, 3.0 nm; PMT Voltage, 240 V for complex L<sub>2</sub>-Zn and EX Slit, 3.0 nm; EM Slit, 0.66 nm; PMT Voltage, 240 V for complex L<sub>2</sub>-M. PL quantum yields and transient PL decay are measured using Edinburgh Instruments FS30 spectrometer, Fluorescence transient spectrum measured by Edinburgh FLS980.CD spectra were measured by Chirascan,

NMR spectra were recorded on a Bruker ADVANCE 400 or 600 NMR Spectrometer. <sup>1</sup>H NMR chemical shifts are reported in ppm downfield from tetramethyl silane (TMS) reference using the residual protonated solvent, as an internal standard.

Mass spectra of complexes and ligands were determined on Waters Synaptic G2 Mass Spectrometer with traveling wave ion mobility (TWIM) under the following conditions: ESI capillary voltage, 3.5 kV; cone voltage, 35 V; desolation gas flow, 800 L/h. TWIM-MS was measured with IM traveling wave height, 25 V; and IM traveling wave velocity, 1000 m/s.

Single crystals were mounted on glass fiber. Intensity data were collected using a Bruker AXS-KAPPA APEX II diffractometer with graphite monochromate Mo-Kα (1/4 0.710-73 Å) radiation and Cu-Kα (1/4 0.710-73 Å). Data were collected using omega scans of 0.5 per frame, and full spheres of data were obtained. Cell parameters were retrieved using Bruker SMART software and refined using Bruker SAINT on all the observed reflections. Absorption corrections were applied using SADABS. Structures were solved by direct methods using the SHELXS-97 package and refined with SHELXL-97. Calculations were performed using the WinGX System Version 1.80.03. The remaining hydrogen atoms were inserted in calculated positions. Least square refinements, with anisotropic thermal motion parameters for all the nonhydrogen atoms and isotropic for the remaining atoms, were employed. CCDC 2170550 (**L<sub>2</sub>-Co**), 2170551 (**L<sub>2</sub>-Ni**), 2170552 (**L<sub>2</sub>-Cu**), 2170553 (**L<sub>2</sub>-Zn**), 2170554 (**L<sub>2</sub>-Fe**), 2169764 (**L<sub>2</sub>-Mn**), 2210926 (**L<sub>1</sub>-Co**) contain the supplementary crystallographic data of this paper. These data can be obtained free of charge from the Cambridge Crystallographic Data Centre via [w.ccdc.cam.ac.uk/data\\_request/cif](http://w.ccdc.cam.ac.uk/data_request/cif). Crystal data and details of data collections are reported in Table S3.

All chemicals were purchased from commercial suppliers and used without further purification unless otherwise specified. Benzaldehyde and 1-(6-bromopyridin-2-yl) ethan-1-one were purchased from Bide Pharmatech Company.

Density functional theory (DFT) calculations were carried out by using the Gaussian 09 package<sup>[1]</sup>. Ground-state geometries were fully optimized with PBE0 functional, 6-31G (d, p) basis set for C, H, O, N atoms and LANL2DZ basis set for Zn atoms. Time-dependent density functional theory (TD-DFT) was employed to calculate excited states using the same basis set. The implicit solvation models (SMD) of water and the dispersion corrections with Grimme's D3(BJ) method<sup>[2]</sup> were taken into consideration in all calculations. The orbital diagrams were prepared using with the Multiwfn software<sup>[3]</sup> and VMD package<sup>[4]</sup>.

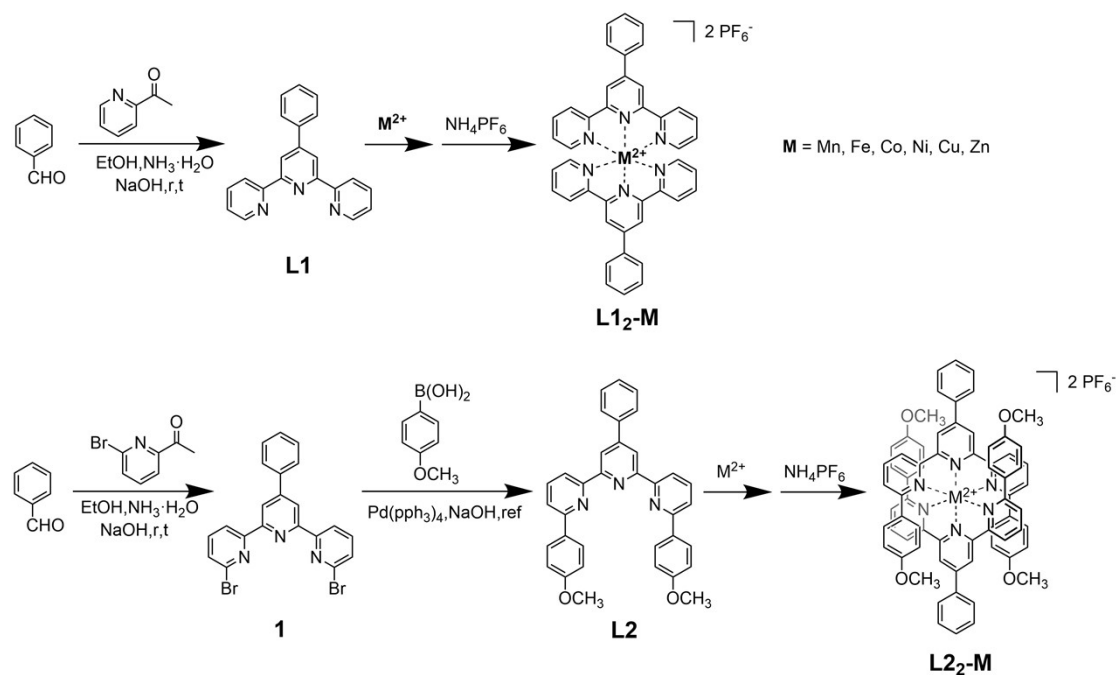

**Scheme S1** Synthesis of complex **L1<sub>2</sub>-M** and **L2<sub>2</sub>-M** ( $M^{2+} = Mn^{2+}, Fe^{2+}, Co^{2+}, Ni^{2+}, Cu^{2+}, Zn^{2+}$ ), ligand **L1** was synthesized according to the literature procedures.<sup>[5]</sup>

1

**Compound 1.** To a solution of benzaldehyde (1.1 g, 10 mmol) in EtOH (60 mL), 1-(6-bromopyridin-2-yl)ethan-1-one (4.9 g, 24.5 mmol) and NaOH powder (2g, 50mmol) was added. After stirring at room temperature for 24 h, aqueous  $NH_3 \cdot H_2O$  (28%, 25 mL) was added, the resulting mixture was refluxed for 20 h. After cooling to room temperature, The solid was collected by suction filtration and was washed with  $CH_3OH$  to give the product as a white solid: 2.042g, 43.7%)  $^1H$  NMR (400 MHz,  $CDCl_3$ , ppm):  $\delta = 8.69$  (s, 2H), 8.59 (d,  $J = 7.6$  Hz, 2H), 7.87 (d,  $J = 7.6$  Hz, 2H), 7.72(t,  $J = 15.6$ Hz, 2H), 7.53 (m, 5H);  $^{13}C$  NMR (126 MHz,  $CDCl_3$ , ppm):  $\delta = 157.3, 154.4, 150.9, 141.7, 139.2, 138.2, 129.2, 129.0, 128.2, 127.4, 120.0, 119.9$ .

**Ligand L2.** To a flask containing **1** (0.2g, 0.43 mmol), (4-methoxyphenyl) boronic acid (0.26 g, 1.7 mmol) and NaOH (0.14 g, 3.5 mmol), A mixed solvent (40mL) of THF/ $H_2O$  (10:1, v/v) was added. Then Pd ( $PPh_3$ )<sub>4</sub> (0.21 g, 0.18 mmol) was added, the system was pumped and backfilled with nitrogen. The mixture was refluxed for 2 days under  $N_2$ . After cooling to 25 °C, the mixture was extracted with  $CHCl_3$  and the combined organic extract was evaporated in vacuo to dryness giving a residue that was washed with  $CH_3OH$ , Then subjected to column chromatography ( $Al_2O_3$ ,  $CH_2Cl_2/MeOH = 100:1$ ), Then the major fraction was recrystallized from a mixture of  $CH_2Cl_2/MeOH$  to give **L2** (64%), As a white solid: 0.14 g (0.81 mmol);  $^1H$  NMR (400 MHz,  $CDCl_3$ , ppm)  $\delta = 8.82$  (s, 2H), 8.53 (d,  $J = 8.4$  Hz, 2H), 8.09 (d,  $J = 8.8$  Hz, 4H), 7.85(m, 4H), 7.69 (d,  $J = 8.8$ Hz, 2H) , 7.51 (t,  $J = 14.8$ Hz, 2H), 7.43 (t,  $J = 14.8$ Hz, H) , .6.99 (d,  $J = 8.8$ Hz, 4H) .3.83 (s, 6H);  $^{13}C$  NMR (126 MHz,  $CDCl_3$ , ppm):  $\delta = 160.5, 156.15 156.1, 155.8, 150.3, 139.2, 137.5, 132.1, 129.0, 128.8, 128.3, 127.5, 119.6, 119.2, 119.0, 114.1, 55.4$ .

## NMR spectra of ligands L1 and L2

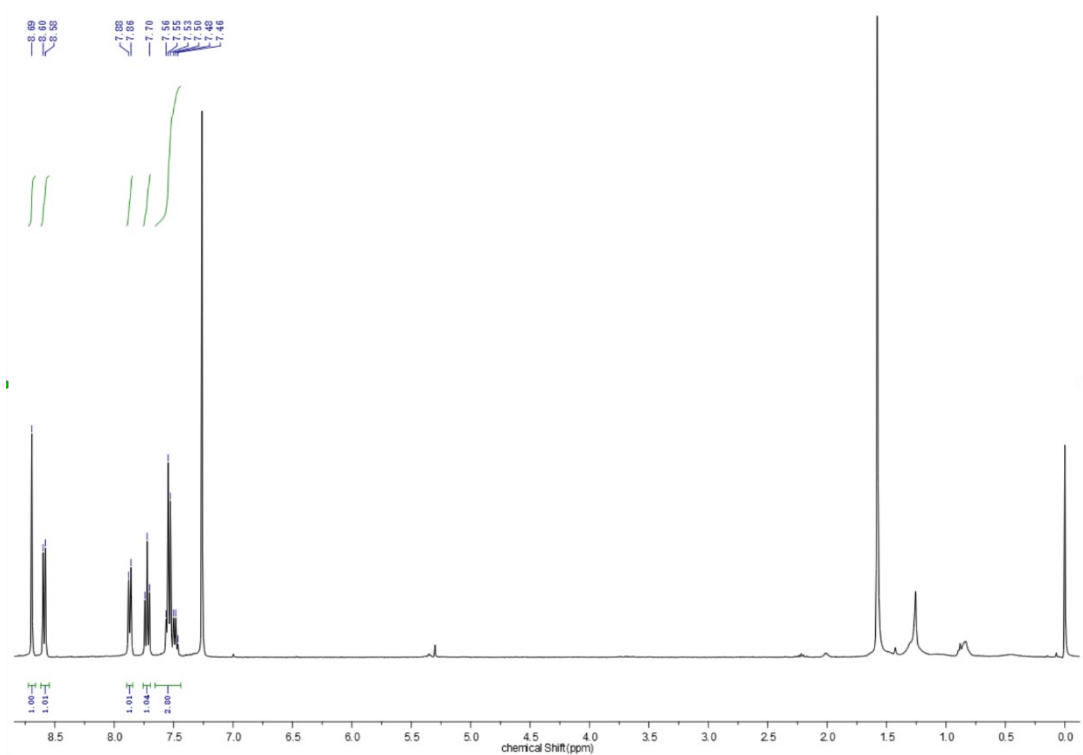

Fig. S1  $^1\text{H}$  NMR spectra of ligand L1 in  $\text{CDCl}_3$ .

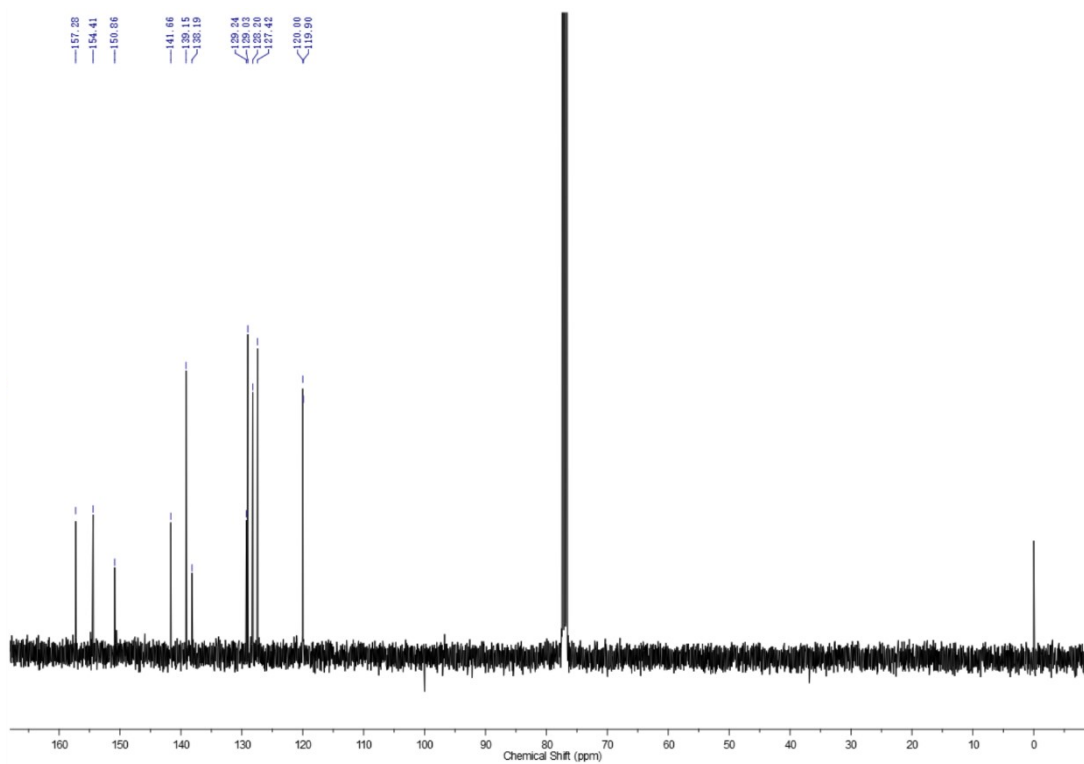

Fig. S2  $^{13}\text{C}$  NMR spectra of ligand L1 in  $\text{CDCl}_3$



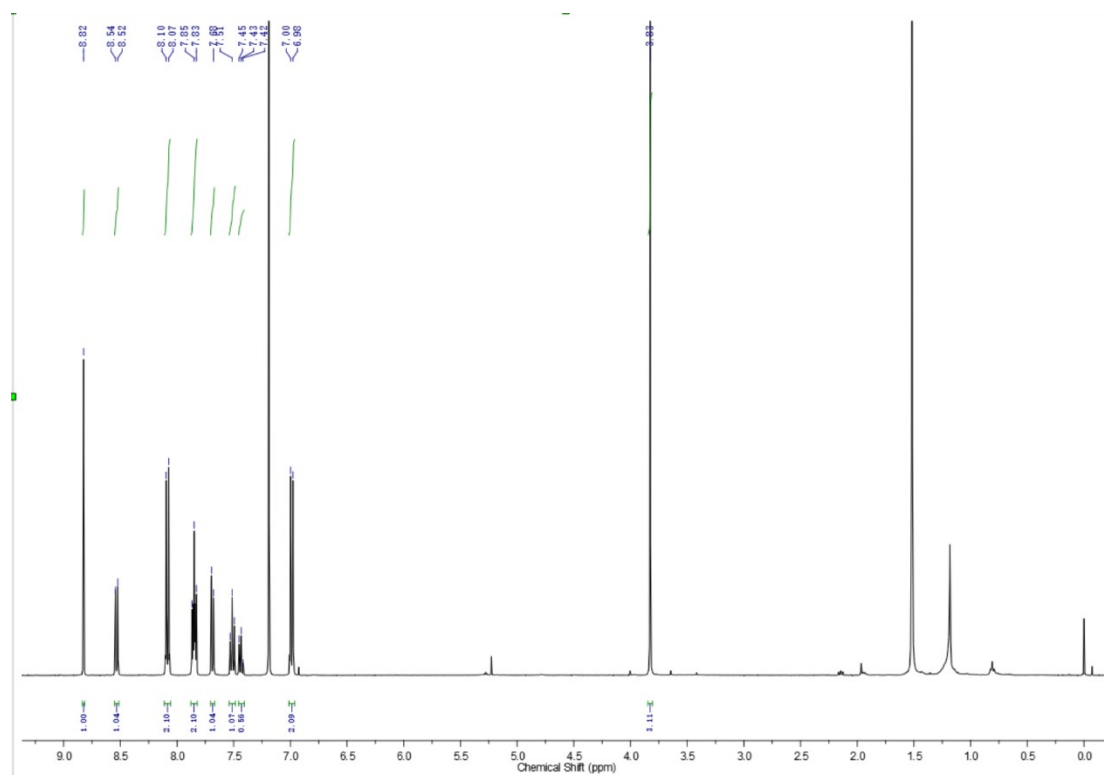

Fig. S3  $^1\text{H}$  NMR spectra of ligand L2 in  $\text{CDCl}_3$ .

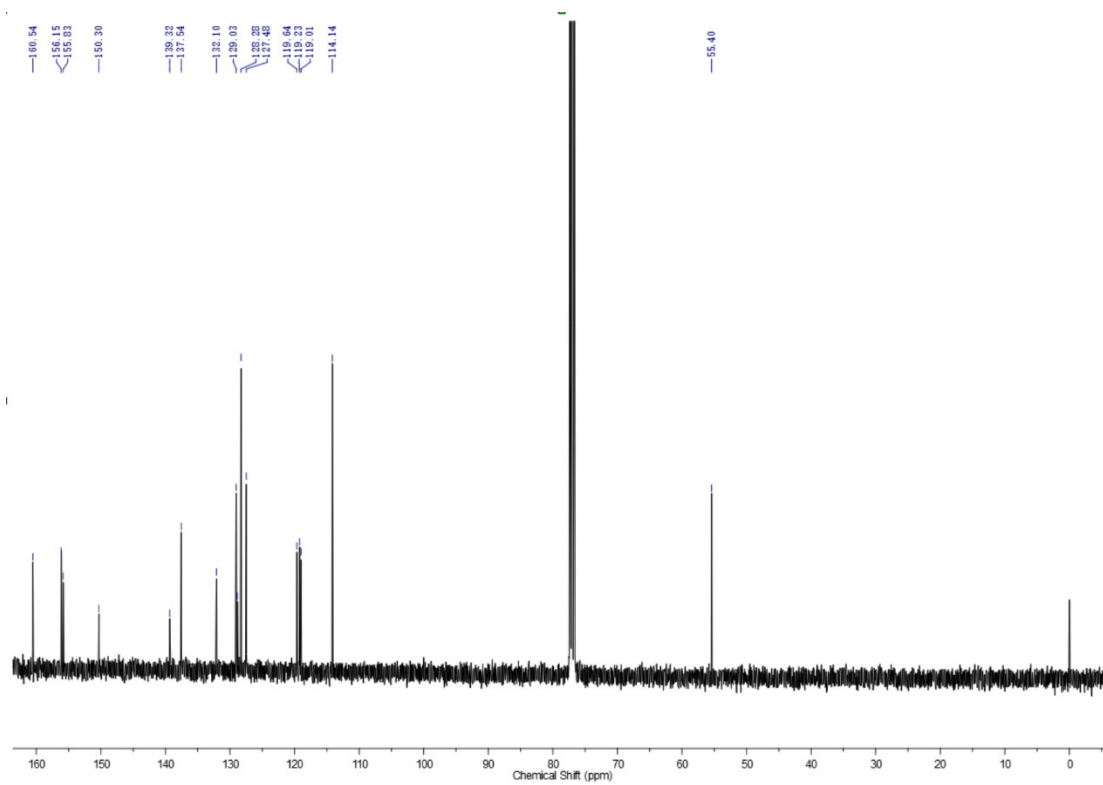

Fig. S4  $^{13}\text{C}$  NMR spectra of ligand L2 in  $\text{CDCl}_3$ .

## Synthesis of Complexes L1<sub>2</sub>-M and L2<sub>2</sub>-M

**Complex L1<sub>2</sub>-M** [<sup>5</sup> (M = Zn [<sup>5</sup>], Cu [<sup>6</sup>], Ni [<sup>5</sup>], Fe [<sup>5</sup>], Mn [<sup>5</sup>]). The Ligand-M was synthesized according to the literature procedures.

**Complex L1<sub>2</sub>-Co.** To mixed solvent of CHCl<sub>3</sub> (15 mL) and MeOH (15 mL) of ligand **2** (56.24 mg, 107.80 μmol) were added, then a solution of Co(NO<sub>3</sub>)<sub>2</sub>·6H<sub>2</sub>O (26.45 mg, 90.89 μmol) in CH<sub>3</sub>OH (5.37 mL) was added. After stirring the mixture at 65 °C for 12 h, excess NH<sub>4</sub>PF<sub>6</sub> was added to precipitate the complex, which was then filtered, washed with H<sub>2</sub>O and then dried *in vacuo*. The desired complex was obtained (76%) as the black solid: 34.70 mg, 24.93 μmol. ESI-MS (967.11 calcd. For C<sub>42</sub>H<sub>30</sub>CoF<sub>12</sub>N<sub>6</sub>P<sub>2</sub>): m/z 823.15[M-PF<sub>6</sub>]<sup>+</sup> (calcd m/z: 823.1584).

**Complex L2<sub>2</sub>-Zn.** To mixed solvent of CHCl<sub>3</sub> (20 mL) and MeOH (20 mL) of ligand **2** (27.97 mg, 53.60 μmol) were added, then a solution of Zn(NO<sub>3</sub>)<sub>2</sub>·6H<sub>2</sub>O (7.98 mg, 26.81 μmol) in CH<sub>3</sub>OH (1.28 mL) was added. After stirring the mixture at 65 °C for 12 h, excess NH<sub>4</sub>PF<sub>6</sub> was added to precipitate the complex, which was then filtered, washed with H<sub>2</sub>O, and then dried *in vacuo*. The desired complex was obtained (80%) as the white solid: 0.03 mg, 21.45 μmol. <sup>1</sup>H NMR (400 MHz, CD<sub>3</sub>CN, ppm) δ = 8.06 (m, 16H), 7.77 (d, J = 8.4 Hz, 4H), 7.52 (d, J = 8.4 Hz, 4H), 7.08 (d, J = 8.8 Hz, 8H), 6.31 (d, J = 8.4 Hz, 8H), 3.41 (s, 12H); <sup>13</sup>C NMR (126 MHz, CD<sub>3</sub>CN, ppm): δ = 161.5, 160.1, 155.6, 150.9, 150.8, 141.3, 136.1, 131.9, 130.1, 130.1, 130.0, 128.7, 127.60, 122.4, 122.2, 113.9, 55.4. ESI-MS (1398.55 calcd. For C<sub>70</sub>H<sub>54</sub>ZnF<sub>12</sub>N<sub>6</sub>O<sub>4</sub>P<sub>2</sub>): m/z 1257.3140[M-PF<sub>6</sub>]<sup>+</sup> (calcd m/z: 1257.3140).

**Complex L2<sub>2</sub>-Cu.** To mixed solvent of CHCl<sub>3</sub> (18 mL) and MeOH 18 mL of ligand **2** (34.23 mg, 65.60 μmol) were added, then a solution of Cu(CH<sub>3</sub>COO)<sub>2</sub>·2H<sub>2</sub>O (7.63 mg, 32.80 μmol) in CH<sub>3</sub>OH (2.60 mL) was added. After stirring the mixture at 65 °C for 12 h, excess NH<sub>4</sub>PF<sub>6</sub> was added to precipitate the complex, which was then filtered, washed with H<sub>2</sub>O, and then dried *in vacuo*. The desired complex was obtained (85%) as the pale-yellow solid: 38.95 mg, 27.88 μmol. <sup>1</sup>H NMR (600 MHz, CD<sub>3</sub>CN, ppm) δ = 8.48 (s, 4H), 8.15 (s), 6.88 (s), 6.33 (s), 4.91 (s, 12H). ESI-MS (1396.71 calcd. For C<sub>70</sub>H<sub>54</sub>CuF<sub>12</sub>N<sub>6</sub>O<sub>4</sub>P<sub>2</sub>): m/z 553.6821[M-2PF<sub>6</sub>]<sup>+</sup> (calcd m/z: 553.6829).

**Complex L2<sub>2</sub>-Ni.** To mixed solvent of CHCl<sub>3</sub> (18 mL) and MeOH (18 mL) of ligand **2** (34.23 mg, 65.60 μmol) were added, then a solution of NiCl<sub>2</sub>·6H<sub>2</sub>O (7.63 mg, 32.80 μmol) in CH<sub>3</sub>OH (2.60 mL) was added. After stirring the mixture at 65 °C for 12 h, excess NH<sub>4</sub>PF<sub>6</sub> was added to precipitate the complex, which was then filtered, washed with H<sub>2</sub>O and then dried *in vacuo*. The desired complex was obtained (85%) as the pale-yellow solid: 38.95 mg, 27.88 μmol. <sup>1</sup>H NMR (600 MHz, CD<sub>3</sub>CN, ppm) δ = 58.86 (s, 4H), 54.90 (s, 4H), 49.64 (s, 4H), 12.01 (s), 10.19 (s, 2H), 7.61 (m), 7.24 (s), 4.03 (s, 12H). ESI-MS (1391.86 calcd. For C<sub>70</sub>H<sub>54</sub>NiF<sub>12</sub>N<sub>6</sub>O<sub>4</sub>P<sub>2</sub>): m/z 551.1874 [M-2PF<sub>6</sub>]<sup>+</sup> (calcd m/z: 551.1858).

**Complex L2<sub>2</sub>-Co.** To mixed solvent of CHCl<sub>3</sub> (20 mL) and MeOH (18 mL) of ligand **2** (56.24 mg, 107.80 μmol) were added, then a solution of Co(NO<sub>3</sub>)<sub>2</sub>·6H<sub>2</sub>O (15.69 mg, 32.80 μmol) in CH<sub>3</sub>OH (1.94 mL) was added. After stirring the mixture at 65 °C for 12 h, excess NH<sub>4</sub>PF<sub>6</sub> was added to precipitate the complex, which was then filtered, washed with H<sub>2</sub>O and then dried *in vacuo*. The desired complex was obtained (76%) as the pink solid: 34.70 mg, 24.93 μmol. <sup>1</sup>H NMR (600 MHz, CD<sub>3</sub>CN, ppm) δ = 107.55 (s, 4H), 69.38 (s, 4H), 37.94 (s, 4H), 27.54 (s, 4H), 15.84 (d), 14.17 (s), 12.59 (s), ESI-MS (1392.10 calcd. For C<sub>70</sub>H<sub>54</sub>CoF<sub>12</sub>N<sub>6</sub>O<sub>4</sub>P<sub>2</sub>): m/z 1247.4475[M-PF<sub>6</sub>]<sup>+</sup> (calcd m/z: 1247.3258).

**Complex L2<sub>2</sub>-Mn.** To mixed solvent of CHCl<sub>3</sub> (21 mL) and MeOH (17 mL) of ligand **2** (35.84 mg, 68.70 μmol) were added, then a solution of Mn(NTF)<sub>2</sub>·6H<sub>2</sub>O (21.14 mg, 34.30 μmol) in CH<sub>3</sub>OH 1.79 mL) was added. After stirring the mixture at 65 °C for 12 h, excess NH<sub>4</sub>PF<sub>6</sub> was added to precipitate the complex, which was then filtered, washed with H<sub>2</sub>O, and then dried *in vacuo*. The desired complex was obtained (59%) as the green solid: 28.09 mg, 20.24 μmol. <sup>1</sup>H NMR (600 MHz, CD<sub>3</sub>CN, ppm) δ = 8.84 (s, 4H), 8.44 (s, 4H), 8.17 (m), 8.10 (s), 7.76 (s),

6.86 (s), 3.83 (s, 12H), ESI-MS (1388.11 calcd. For  $C_{70}H_{54}MnF_{12}N_6O_4P_2$ ):  $m/z$  549.6860[M-2PF<sub>6</sub>]<sup>+</sup> (calcd  $m/z$  549.6871).

**Complex L<sub>2</sub>-Fe.** The L<sub>2</sub>-Fe<sup>[7]</sup> was synthesized according to the literature procedures.

## NMR and MS spectra of complexes L<sub>1</sub>-M and L<sub>2</sub>-M

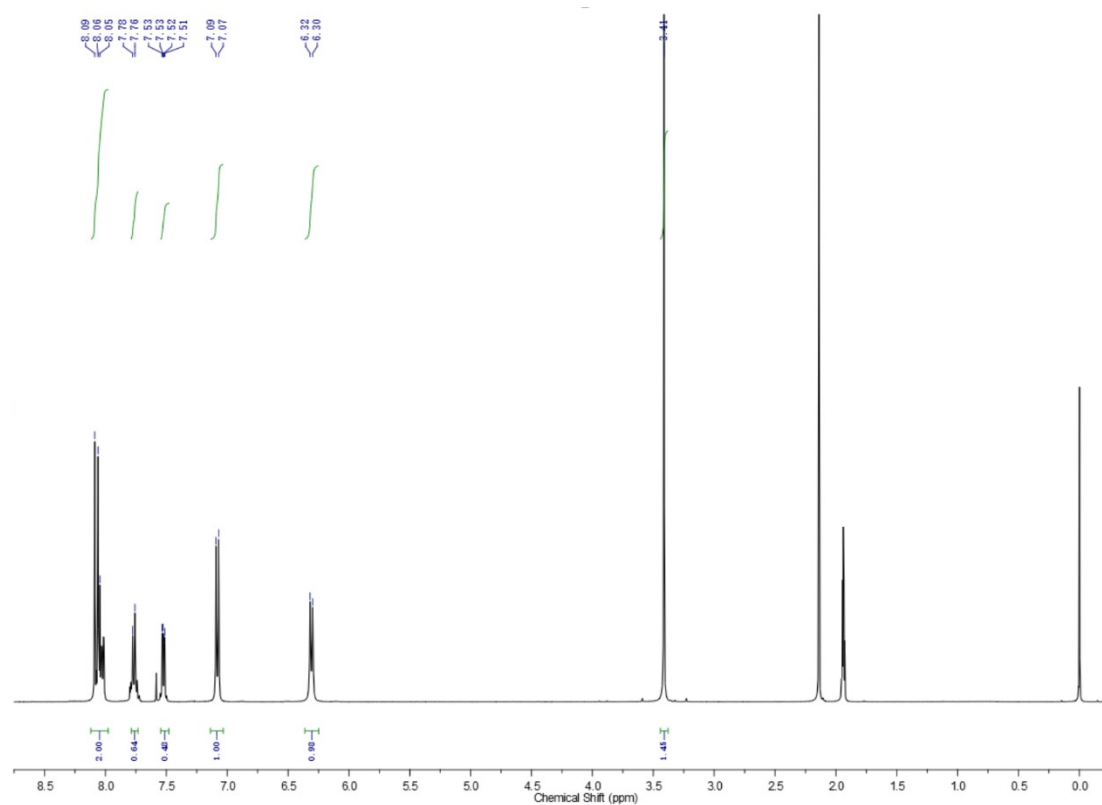

**Fig. S5** <sup>1</sup>H NMR spectra of complex L<sub>2</sub>-Zn in CD<sub>3</sub>CN.

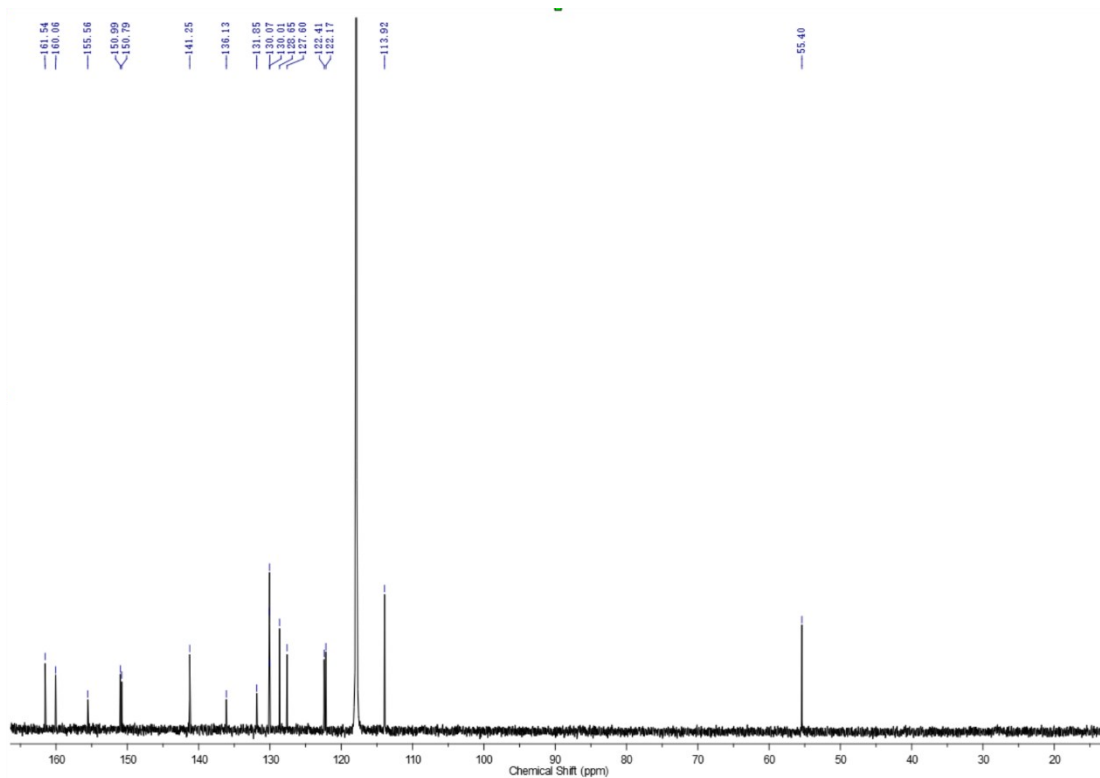

Fig. S6  $^{13}\text{C}$  NMR spectra of complex  $\text{L2}_2\text{-Zn}$  in  $\text{CD}_3\text{CN}$ .

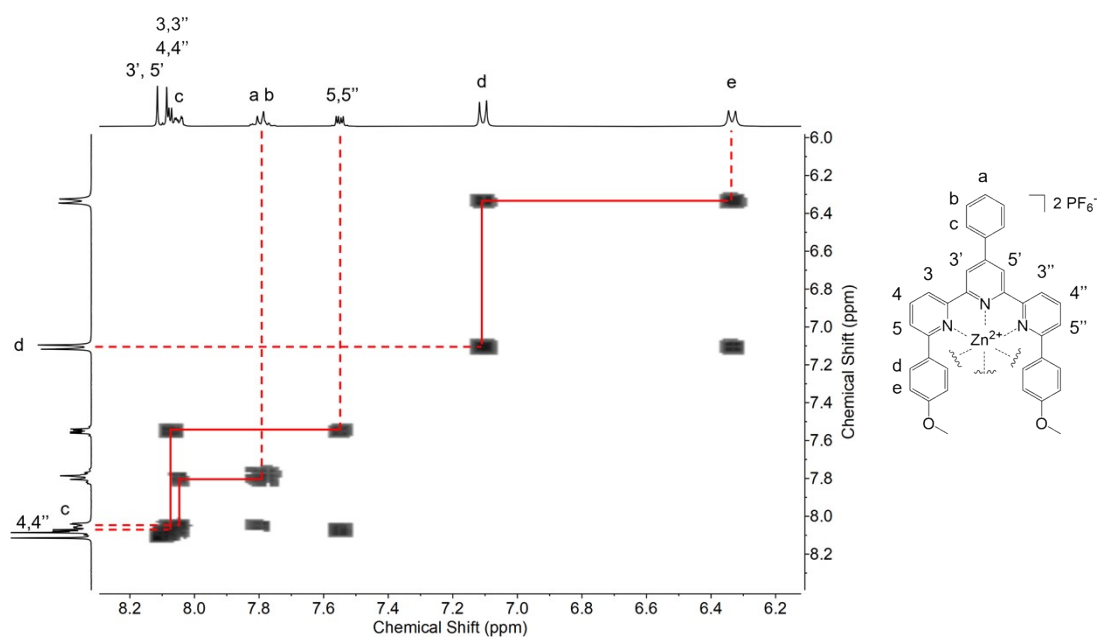

Fig. S7 2D COSY spectra of complex  $\text{L2}_2\text{-Zn}$  in  $\text{CD}_3\text{CN}$ .

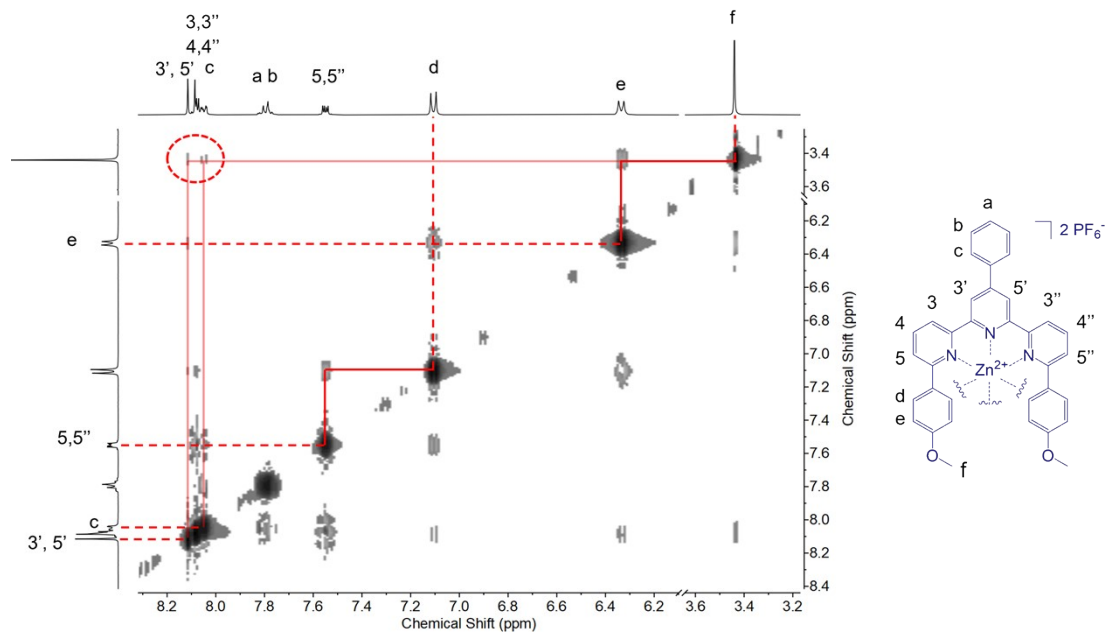

Fig. S8 2D NOESY spectra of complex  $L2_2-Zn$  in  $CD_3CN$ .

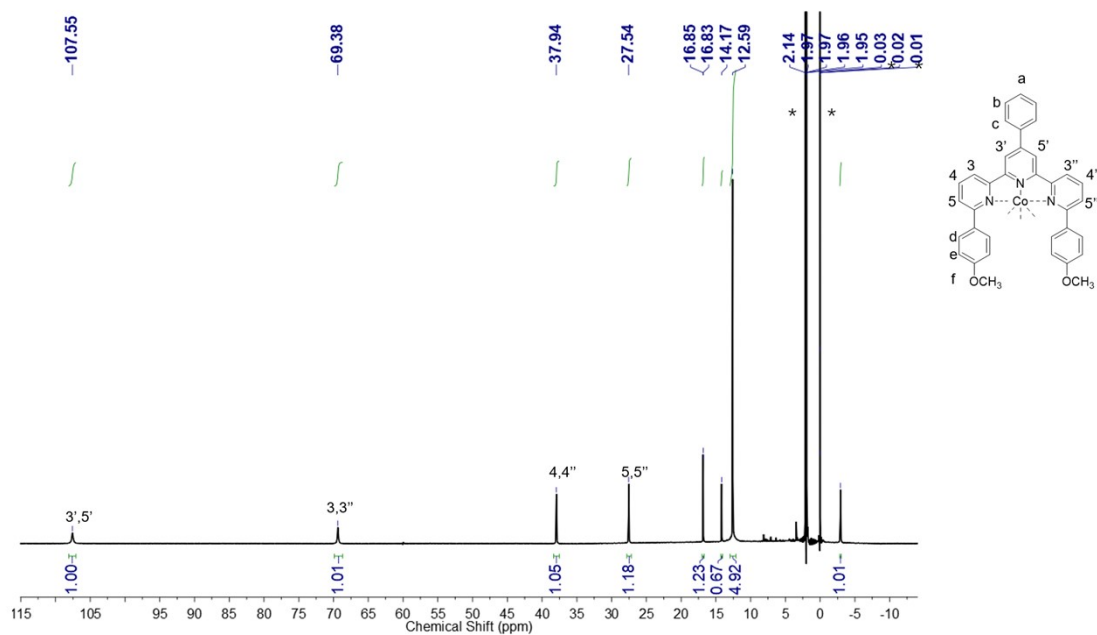

Fig. S9  $^1H$ NMR spectra of complex  $L2_2-Co$  in  $CD_3CN$  (\* residual acetonitrile solvent, and silicone grease).

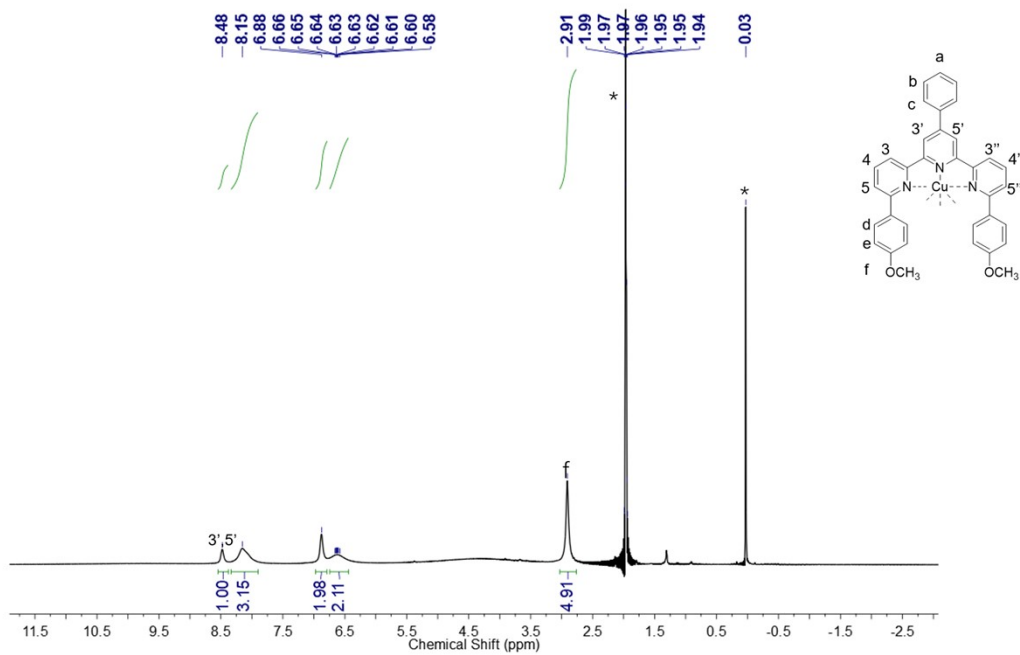

Fig. S10  $^1\text{H}$ NMR spectra of complex  $\text{L2}_2\text{-Cu}$  in  $\text{CD}_3\text{CN}$ (\* residual acetonitrile solvent, and silicone grease).

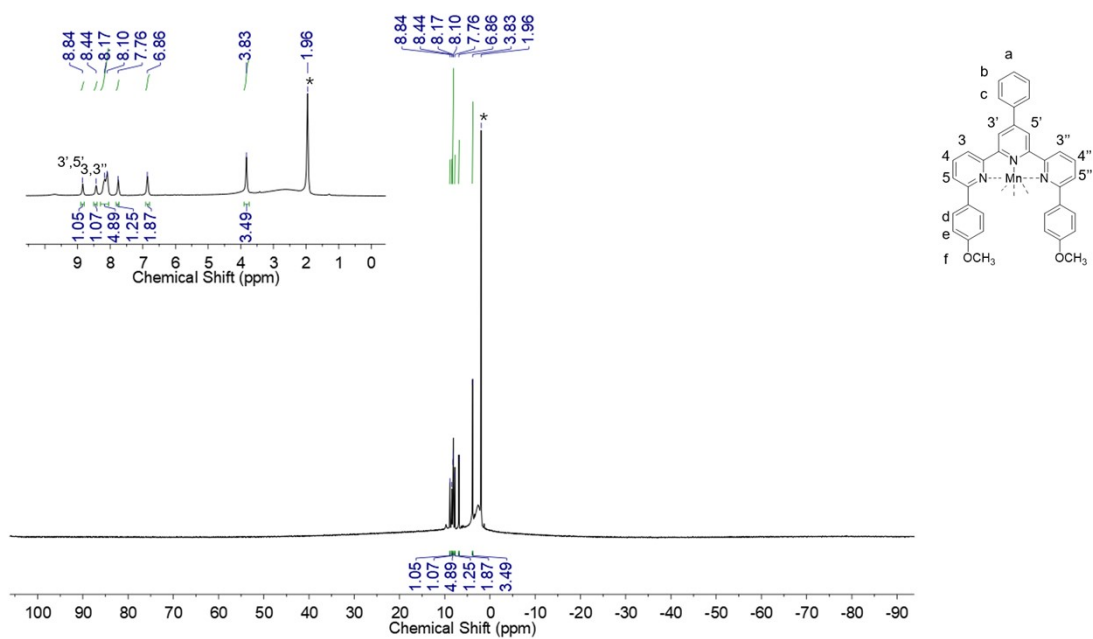

Fig. S11  $^1\text{H}$ NMR spectra of complex  $\text{L2}_2\text{-Mn}$  in  $\text{CD}_3\text{CN}$ (\* residual acetonitrile solvent, and silicone grease).

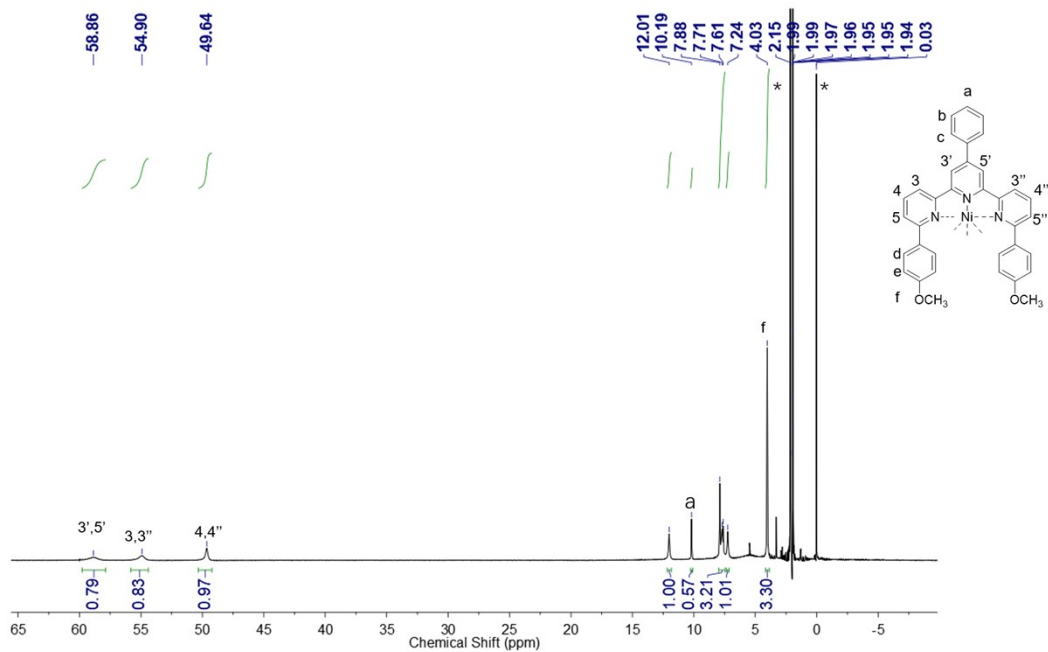

Fig. S12  $^1\text{H}$ NMR spectra of complex  $\text{L2}_2\text{-Ni}$  in  $\text{CD}_3\text{CN}$ (\* residual acetonitrile solvent, and silicone grease).

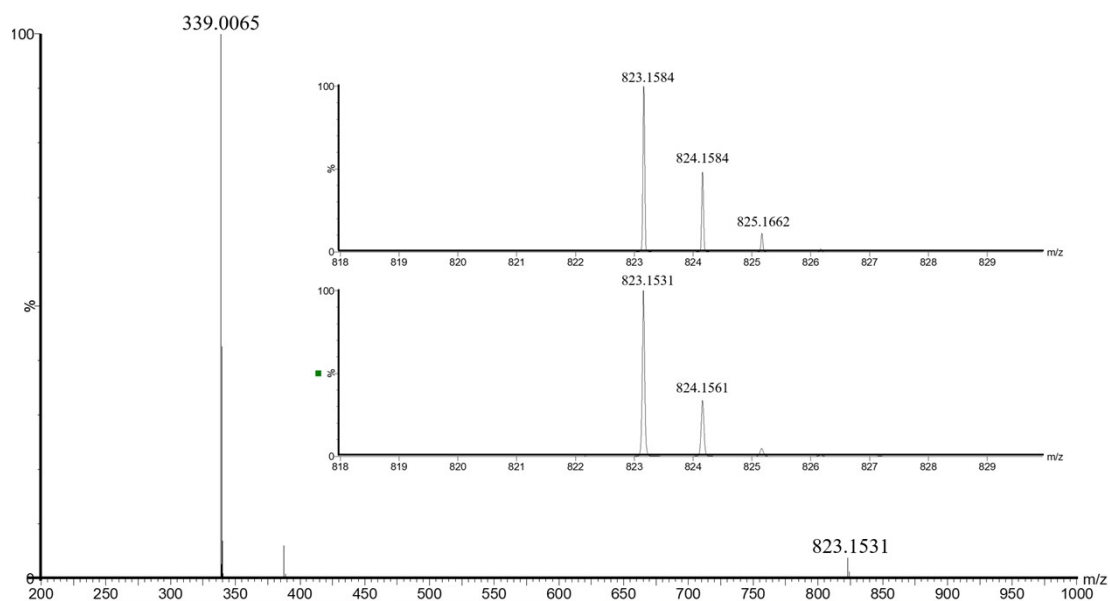

Fig. S13 The ESI-MS spectra of complex  $\text{L1}_2\text{-Co}$ .

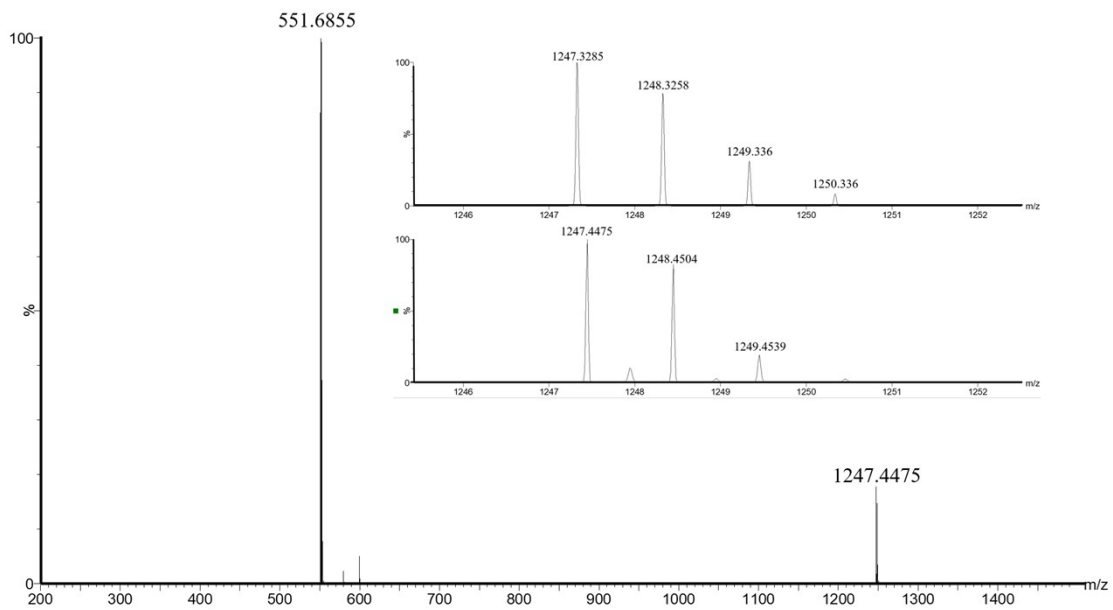

**Fig. S14** The ESI-MS spectra of complex L<sub>2</sub>-Co.

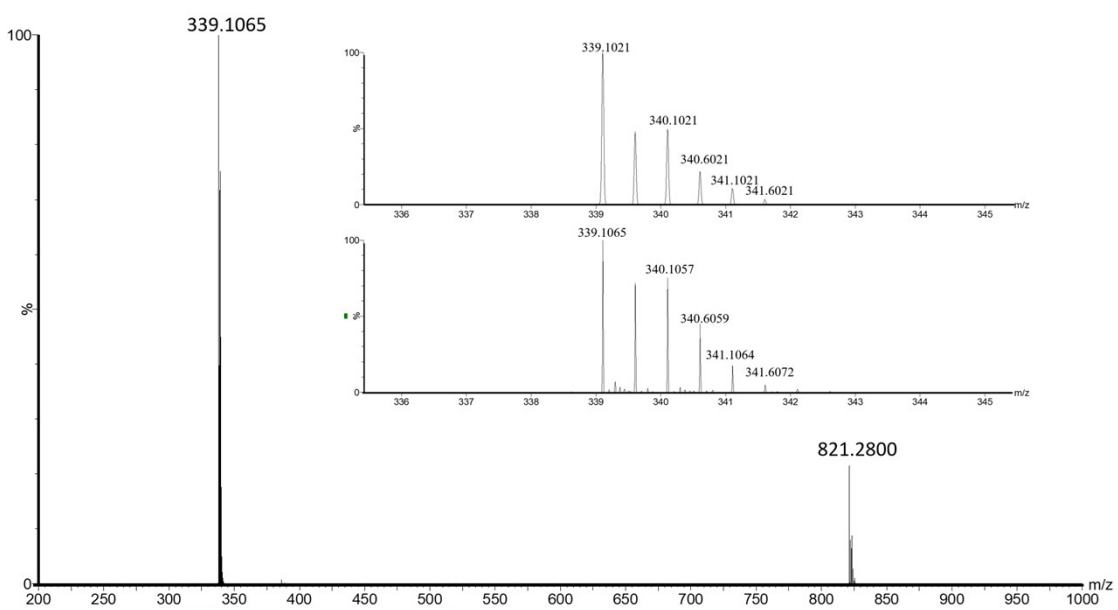

**Fig. S15** The ESI-MS spectra of complex L<sub>12</sub>-Ni.



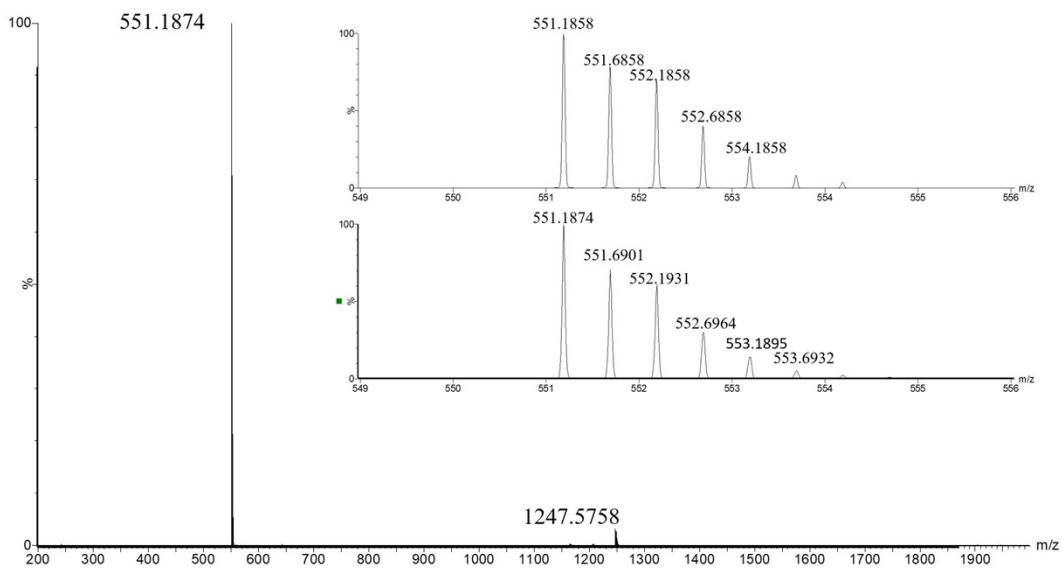

**Fig. S16** The ESI-MS spectra of complex  $L_2-Ni$ .

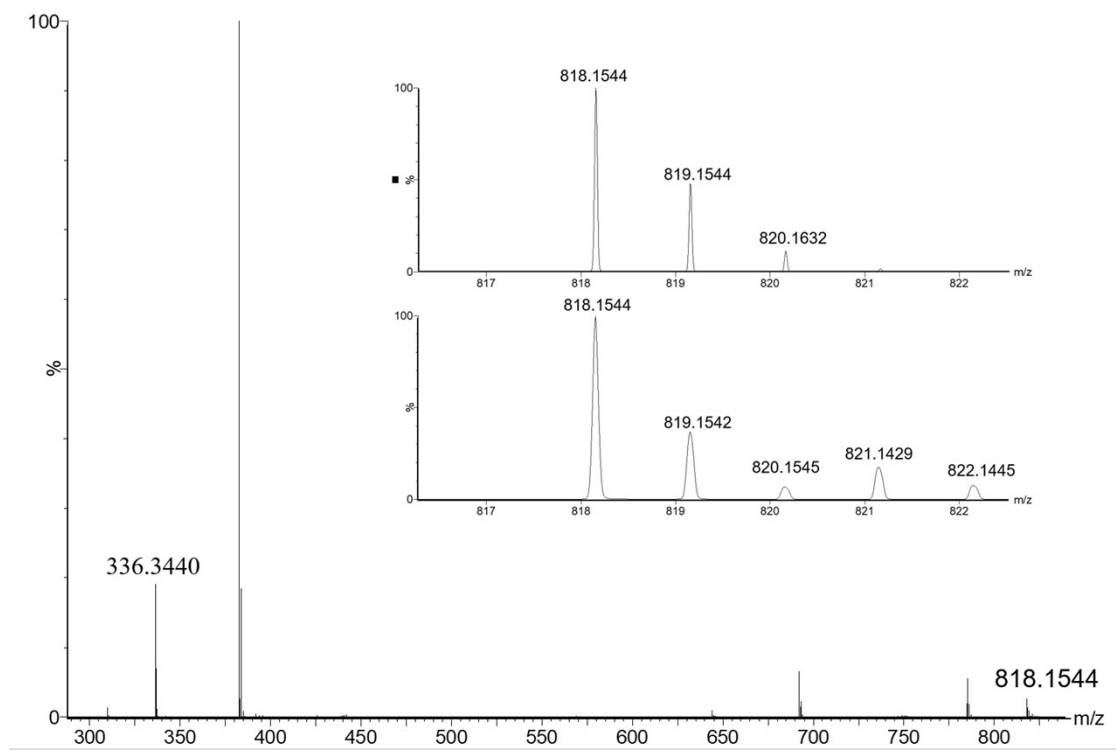

**Fig. S17** The ESI-MS spectra of complex  $L_1-Mn$ .

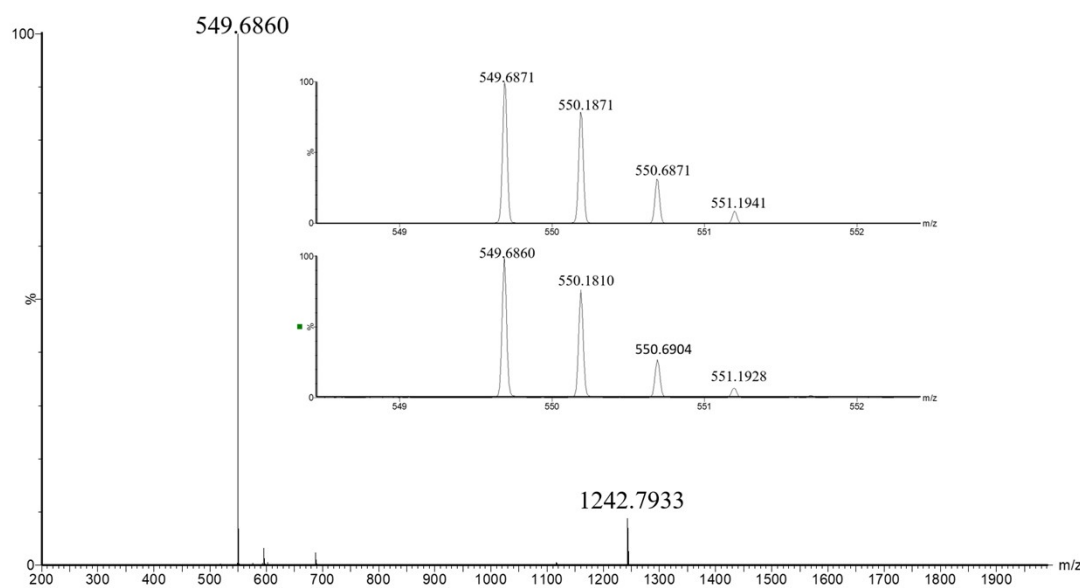

**Fig. S18** The ESI-MS spectra of complex L<sub>2</sub>-Mn.

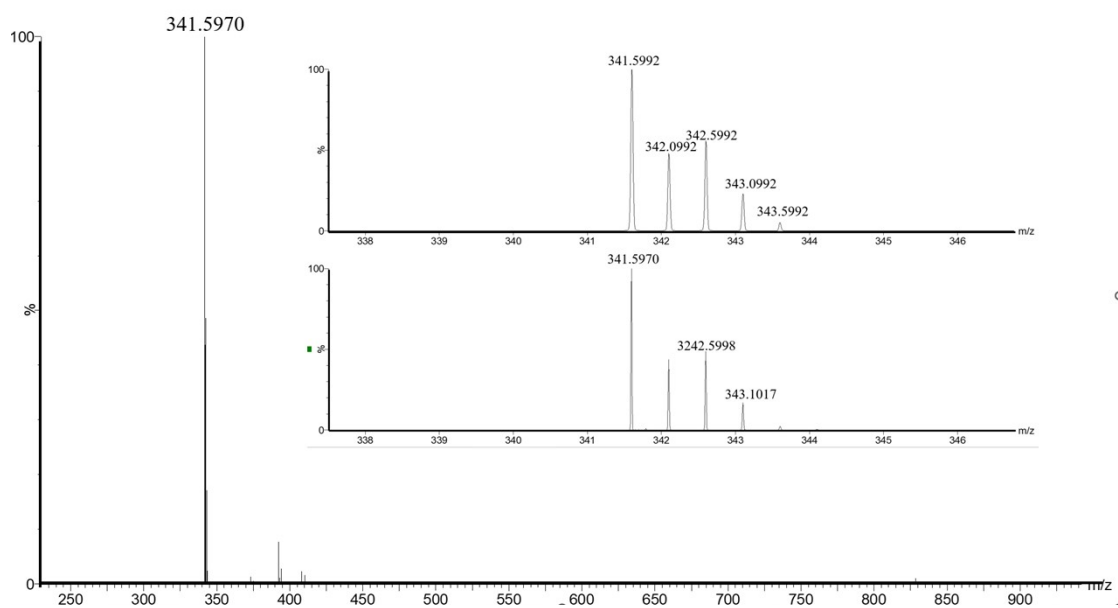

**Fig. S19** The ESI-MS spectra of complex L<sub>1</sub>-Cu.

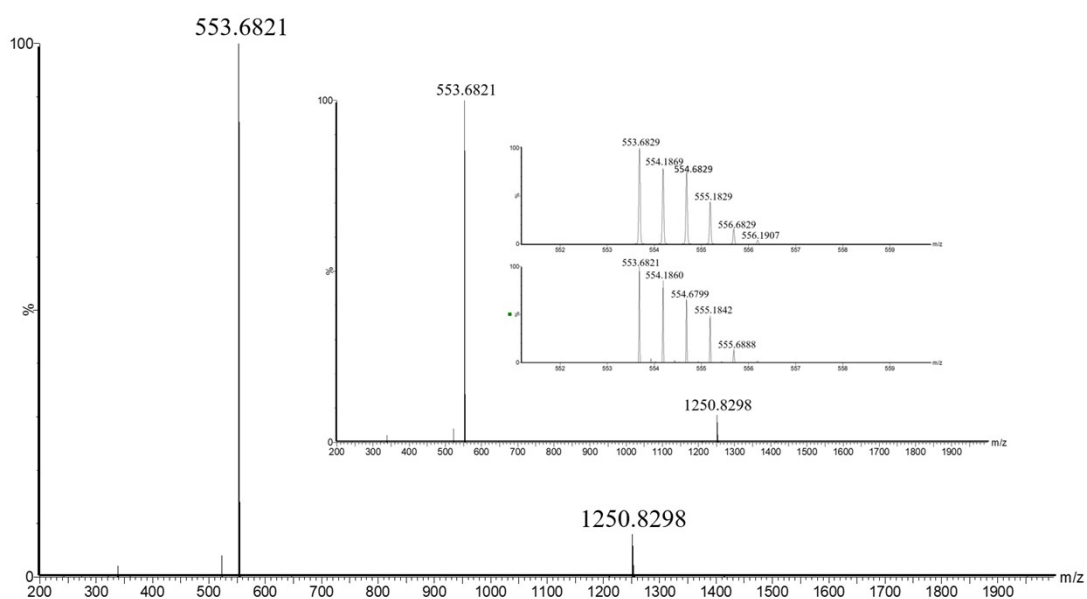

**Fig. S20** The ESI-MS spectra of complex L2-Cu.

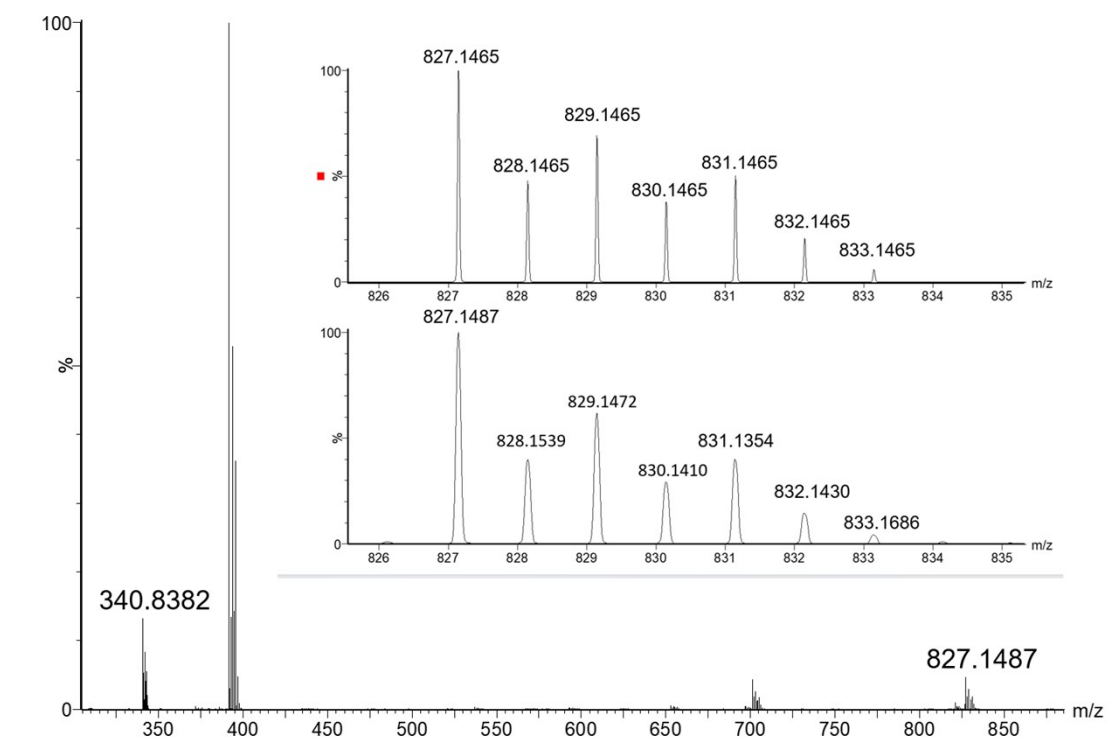

**Fig. S21** The ESI-MS spectra of complex L1-Zn.

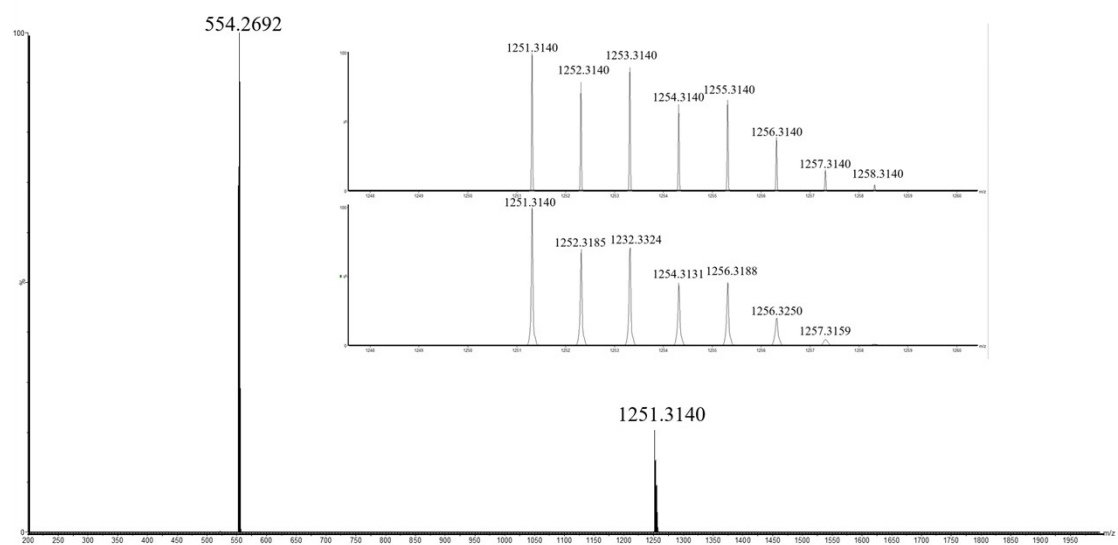

**Fig. S22** The ESI-MS spectra of complex **L<sub>2</sub>-Zn**.

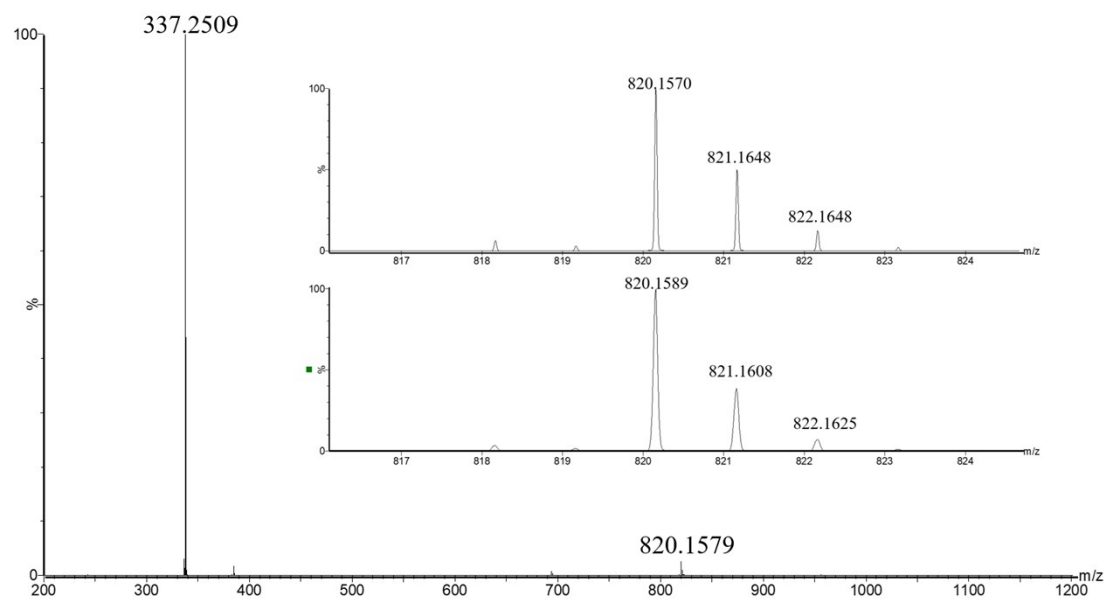

**Fig. S23** The ESI-MS spectra of complex **L<sub>1</sub>-Fe**.

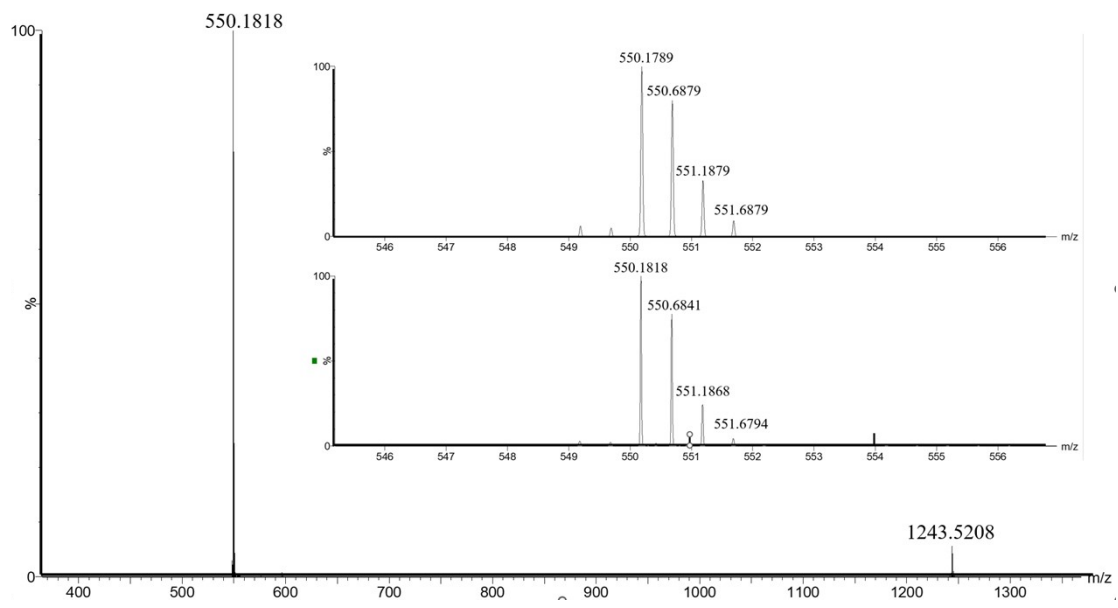

Fig. S24 The ESI-MS spectra of complex L<sub>2</sub>-Fe.

## Crystal structure

Crystals of  $[\text{Co}(\text{L1})_2] [\text{PF}_6]_2 \cdot \text{CH}_3\text{CN}$  and  $[\text{M}(\text{L2})_2] [\text{PF}_6]_2 \cdot \text{CH}_3\text{CN} \cdot \text{H}_2\text{O}$  ( $\text{Fe}^{2+}$ ,  $\text{Co}^{2+}$ ,  $\text{Zn}^{2+}$ ) grew within seven days by layering  $\text{H}_2\text{O}$  over a  $\text{CH}_3\text{CN}$  solution of complexes. Crystals of  $\text{M}(\text{L2})_2$  ( $\text{Mn}^{2+}$ ,  $\text{Ni}^{2+}$ ,  $\text{Cu}^{2+}$ ) grew within seven days by slow evaporation  $\text{CHCl}_3/\text{CH}_3\text{OH}$  solution of  $[\text{Mn}(\text{L2})_2] [(\text{CF}_3\text{SO}_2)_2\text{N}]_2$ ,  $[\text{Ni}(\text{L2})_2] [\text{CF}_3\text{SO}_3]_2$  and  $[\text{Cu}(\text{L2})_2] [\text{NO}_3]_2$ , respectively.

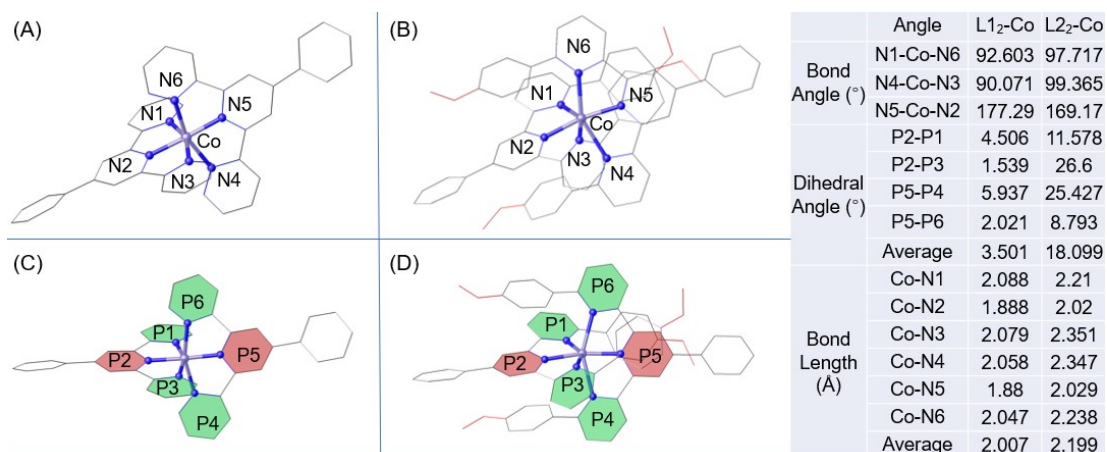

Fig. S25 Molecular structure of L1<sub>2</sub>-Co and L2<sub>2</sub>-Co at room temperature.

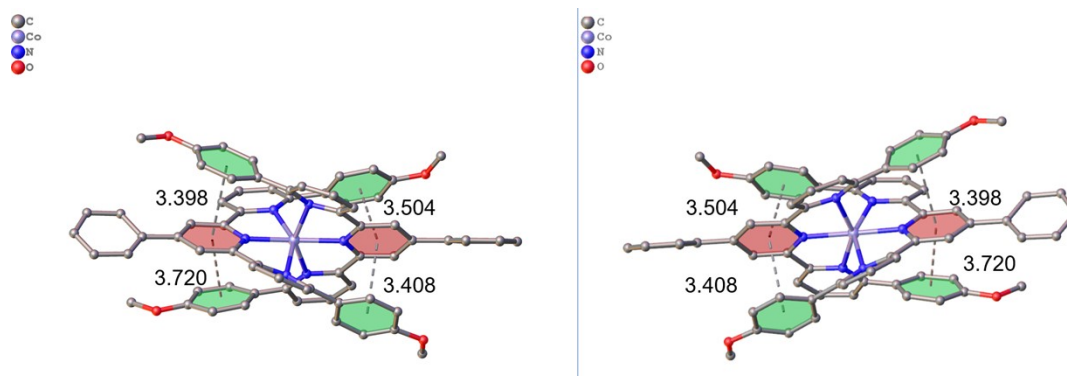

Fig. S26 P and M helical conformation extracted from the crystal structure of L2<sub>2</sub>-Co.

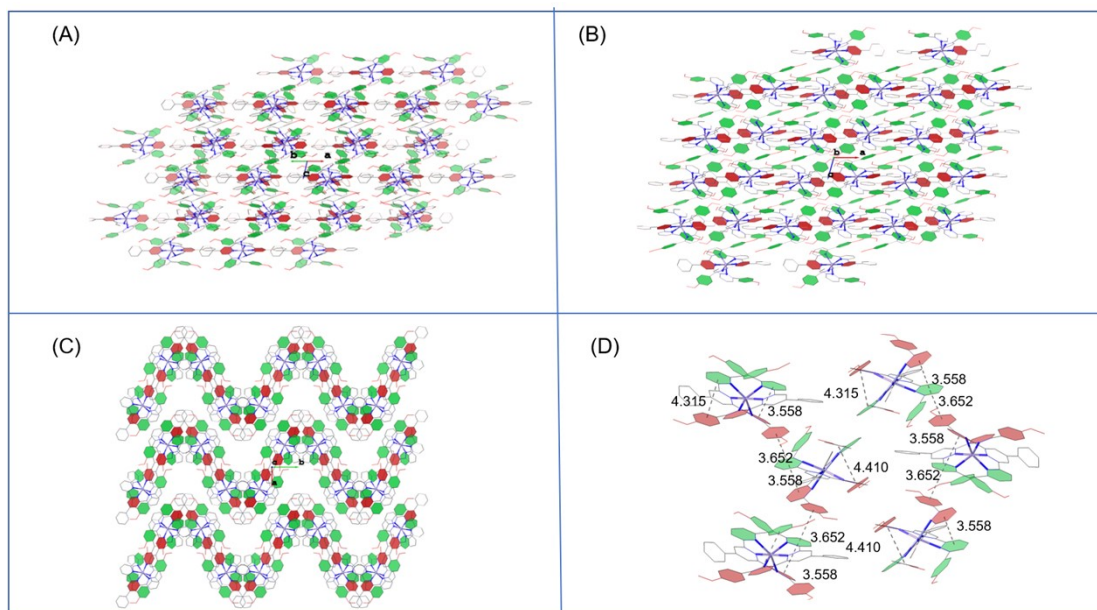

**Fig. S27** The views of the  $\pi$ - $\pi$  stacking interactions of the molecule of complex **L22-Co**: (a) viewed on 110 from crystal plane, (b) 010 crystal plane, (c) 001 crystal. and (d)  $\pi$ - $\pi$  stacking interactions of the molecule.

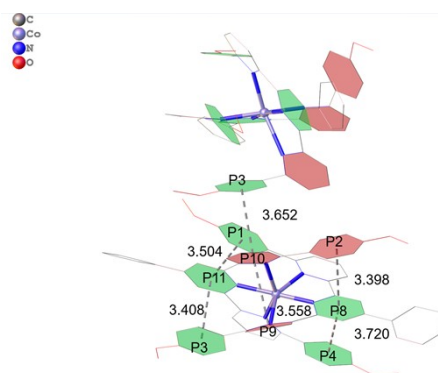

**Fig. S28** The views of the intramolecular and intermolecular  $\pi$ - $\pi$  stacking interactions of the molecule **L22-Co**.

**Table S1**  $\pi$ - $\pi$  stacking interactions in **L22-Co**. P1: C043  $\rightarrow$  C04W  $\rightarrow$  C042  $\rightarrow$  C049  $\rightarrow$  C02K  $\rightarrow$  C01U, P2 : C017  $\rightarrow$  C00P  $\rightarrow$  C046  $\rightarrow$  C04M  $\rightarrow$  C05B  $\rightarrow$  C02Q, P3: C03U  $\rightarrow$  C00U  $\rightarrow$  C010  $\rightarrow$  C036  $\rightarrow$  C03J  $\rightarrow$  C056, P4 : C6  $\rightarrow$  C5  $\rightarrow$  C05K  $\rightarrow$  C0  $\rightarrow$  C3  $\rightarrow$  C2, P5 : C03Q  $\rightarrow$  C03P  $\rightarrow$  C03F  $\rightarrow$  C055  $\rightarrow$  C05F  $\rightarrow$  C03W, P6: C03D  $\rightarrow$  C04G  $\rightarrow$  C024  $\rightarrow$  C02N  $\rightarrow$  C02U  $\rightarrow$  C04Y, P7: N01B  $\rightarrow$  C058  $\rightarrow$  C04V  $\rightarrow$  C03I  $\rightarrow$  C02H  $\rightarrow$  C01Q. P8  $\rightarrow$  N01E  $\rightarrow$  C016  $\rightarrow$  C03S  $\rightarrow$  C02M  $\rightarrow$  C02O  $\rightarrow$  C00N , P9: N01L  $\rightarrow$  C04C  $\rightarrow$  C04X  $\rightarrow$  C04J  $\rightarrow$  C04A  $\rightarrow$  C02P . P10: N01N  $\rightarrow$  C025  $\rightarrow$  C01J  $\rightarrow$  C03V  $\rightarrow$  C048  $\rightarrow$  C00C. P11: N038  $\rightarrow$  C034  $\rightarrow$  C02R  $\rightarrow$  C03B  $\rightarrow$  C028  $\rightarrow$  C01C, P12: N03C  $\rightarrow$  C03G  $\rightarrow$  C03M  $\rightarrow$  C03L  $\rightarrow$  C04I  $\rightarrow$  C026.

| Entry | $\pi$ - $\pi$ stack | C-C (Å) | $\alpha$ (°) | $\beta$ (°) | C-plane (Å) | Slippage (Å) | Symmetry operation  |
|-------|---------------------|---------|--------------|-------------|-------------|--------------|---------------------|
| 1     | P1-P11              | 3.504   | 9.24         | 9.86        | 3.264       | 1.248        | (+X, +Y, +Z)        |
| 2     | P2-P8               | 3.398   | 10.988       | 36.9        | 3.373       | 0.411        | (+X, +Y, +Z)        |
| 3     | P3-P9               | 3.652   | 1.504        | 3.2         | 3.533       | 0.844        | (+X, 1/2-Y, -1/2+Z) |
| 4     | P3-P11              | 3.408   | 7.401        | 40.6        | 3.374       | 0.487        | (+X, +Y, +Z)        |
| 5     | P4-P8               | 3.72    | 12.432       | 28.4        | 3.32        | 1.683        | (+X, +Y, +Z)        |
| 6     | P9-P10              | 3.558   | 19.169       | 59.2        | 3.518       | 0.82         | (+X, +Y, +Z)        |

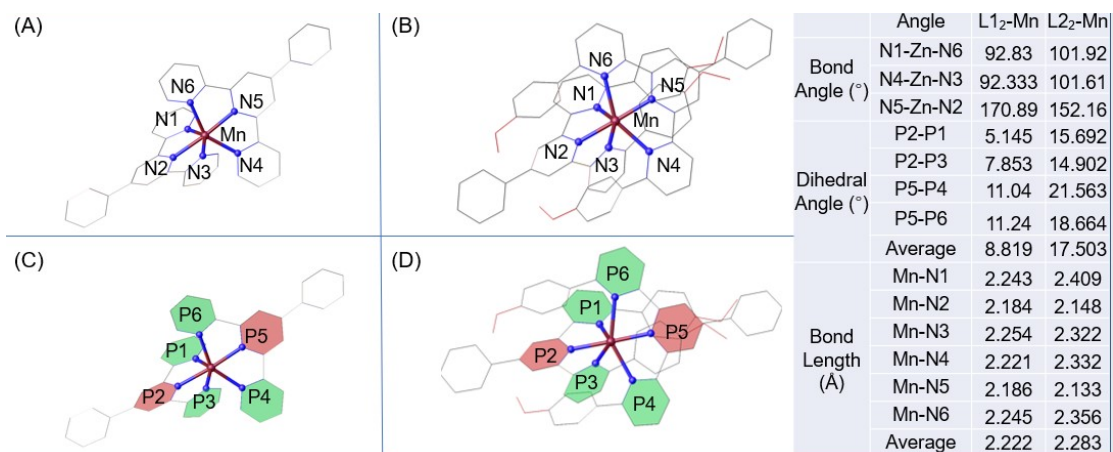

Fig. S29 Molecular structure of L1<sub>2</sub>-Mn and L2<sub>2</sub>-Mn at room temperature.

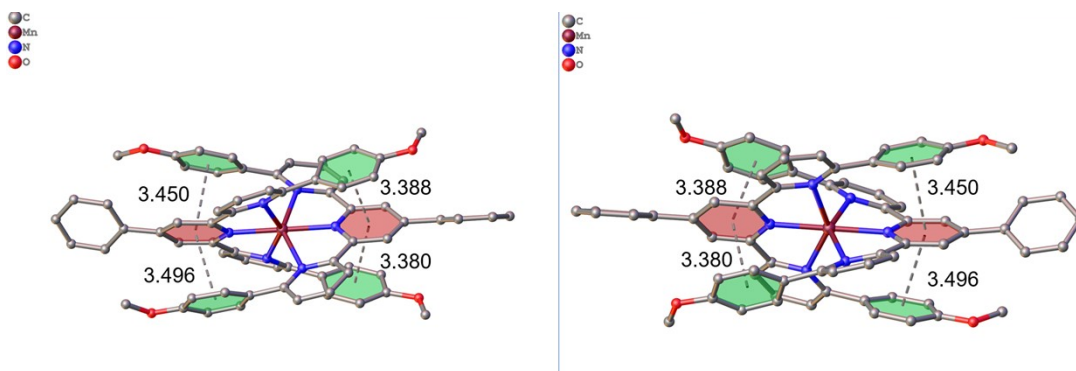

Fig. S30 P and M helical conformation extracted from the crystal structure of L2<sub>2</sub>-Mn.

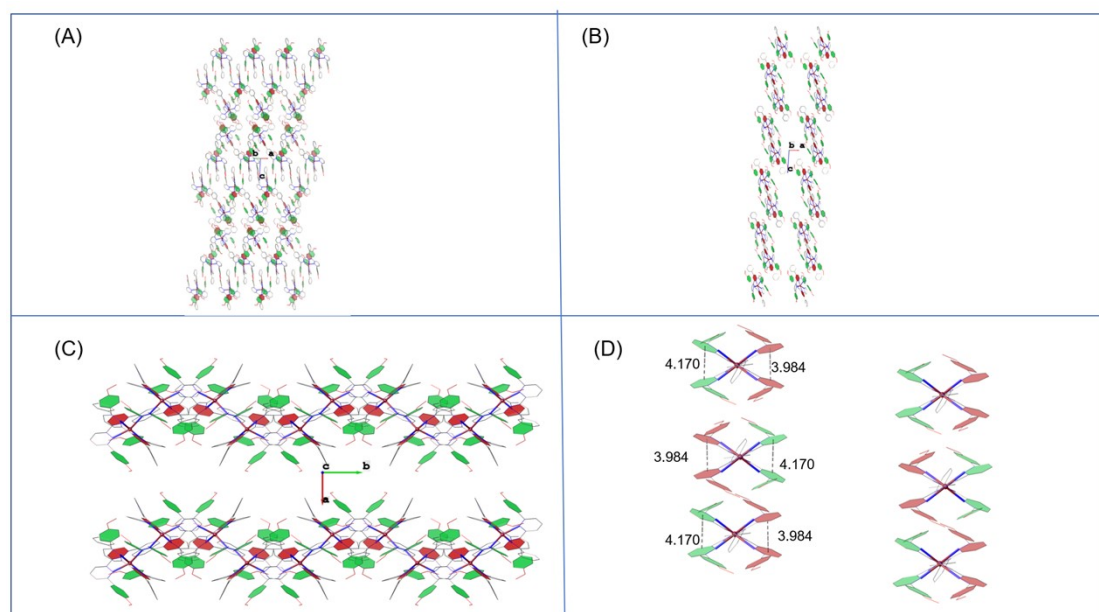

Fig. S31 The views of the  $\pi$ - $\pi$  stacking interactions of the molecule of complex L2<sub>2</sub>-Mn: (a) viewed on 110 from crystal plane, (b) 010 crystal plane, (c) 001 crystal. and (d)  $\pi$ - $\pi$  stacking interactions of the molecule.



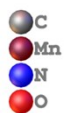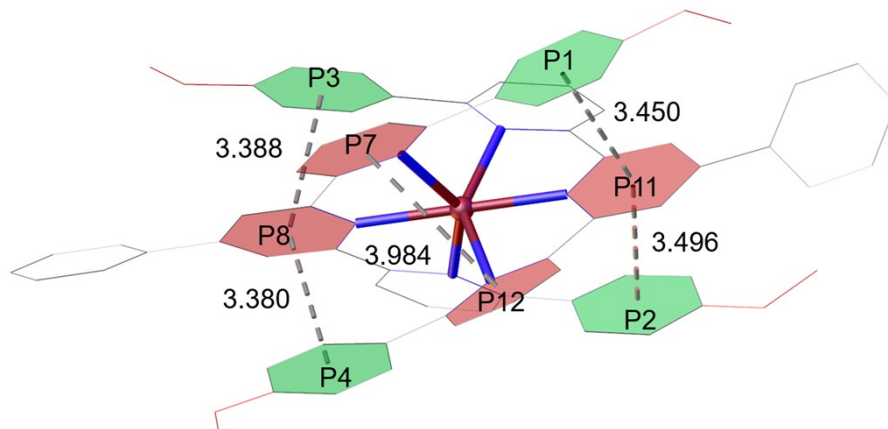

**Fig. S32** The views of the intramolecular and intermolecular  $\pi$ - $\pi$  stacking interactions of the molecule **L2<sub>2</sub>-Mn**.

**Table S2**  $\pi$ - $\pi$  stacking interactions in **L2<sub>2</sub>-Mn**. P1: C17  $\rightarrow$  C22  $\rightarrow$  C21  $\rightarrow$  C20  $\rightarrow$  C19  $\rightarrow$  C18 , P2: C29  $\rightarrow$  C34  $\rightarrow$  C33  $\rightarrow$  C32  $\rightarrow$  C31  $\rightarrow$  C30 , P3: C29A  $\rightarrow$  C34A  $\rightarrow$  C33A  $\rightarrow$  C32A  $\rightarrow$  C31A  $\rightarrow$  C30A , P4: C17A  $\rightarrow$  C22A  $\rightarrow$  C21A  $\rightarrow$  C20A  $\rightarrow$  C19A  $\rightarrow$  C18A , P5: C4  $\rightarrow$  C5  $\rightarrow$  C6  $\rightarrow$  C1  $\rightarrow$  C2  $\rightarrow$  C3 , P6: C4A  $\rightarrow$  C5A  $\rightarrow$  C6A  $\rightarrow$  C1A  $\rightarrow$  C2A  $\rightarrow$  C3A , P7: N1  $\rightarrow$  C16  $\rightarrow$  C15  $\rightarrow$  C14  $\rightarrow$  C13  $\rightarrow$  C12 , P8: N2  $\rightarrow$  C10  $\rightarrow$  C11  $\rightarrow$  C7  $\rightarrow$  C8  $\rightarrow$  C9 , P9: N3  $\rightarrow$  C28  $\rightarrow$  C27  $\rightarrow$  C26  $\rightarrow$  C25  $\rightarrow$  C24 , P10: N4  $\rightarrow$  C28A  $\rightarrow$  C27A  $\rightarrow$  C26A  $\rightarrow$  C25A  $\rightarrow$  C24A, p11: N5  $\rightarrow$  C10A  $\rightarrow$  C11A  $\rightarrow$  C7A  $\rightarrow$  C8A  $\rightarrow$  C9A , P12: N6  $\rightarrow$  C16A  $\rightarrow$  C15A  $\rightarrow$  C14A  $\rightarrow$  C13A  $\rightarrow$  C12A.

| Entry | $\pi$ - $\pi$ stack | c-c(Å) | $\alpha$ (°) | $\beta$ (°) | c-plane (Å) | Slippage (Å) | Symmetry operation |
|-------|---------------------|--------|--------------|-------------|-------------|--------------|--------------------|
| 1     | P1-P11              | 3.45   | 7.032        | 25.6        | 3.32        | 0.965        | (+X, +Y, +Z)       |
| 2     | P2-P11              | 3.496  | 8.585        | 24.7        | 3.298       | 1.162        | (+X, +Y, +Z)       |
| 3     | P3-P8               | 3.388  | 6.586        | 22.5        | 3.236       | 0.877        | (+X, +Y, +Z)       |
| 4     | P4-P8               | 3.38   | 7.231        | 25.1        | 3.296       | 0.747        | (+X, +Y, +Z)       |
| 5     | P7-P12              | 3.984  | 30.527       | 74          | 3.664       | 1.885        | (+X, +Y, +Z)       |

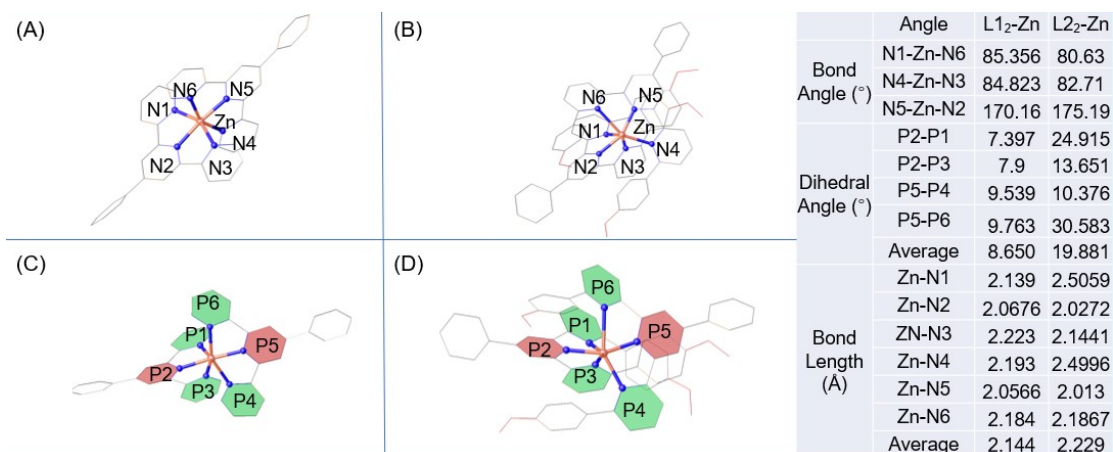

Fig. S33 Molecular structure of L<sub>12</sub>-Zn and L<sub>22</sub>-Zn at room temperature.

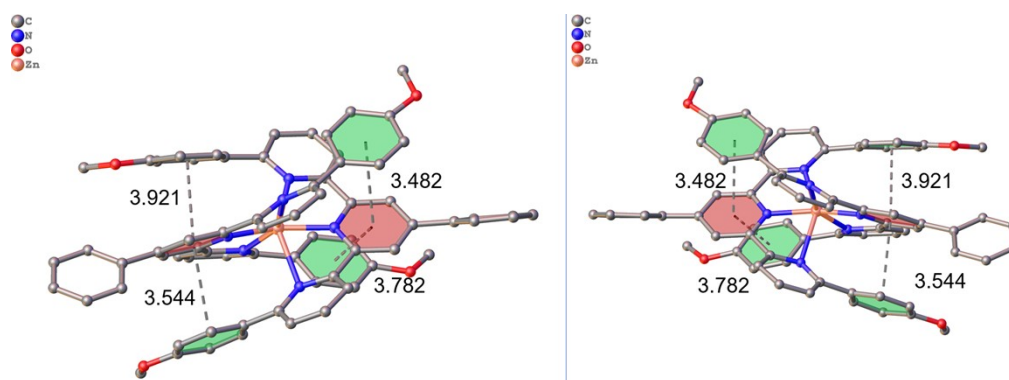

Fig. S34 P and M helical conformation extracted from the crystal structure of L<sub>22</sub>-Zn.

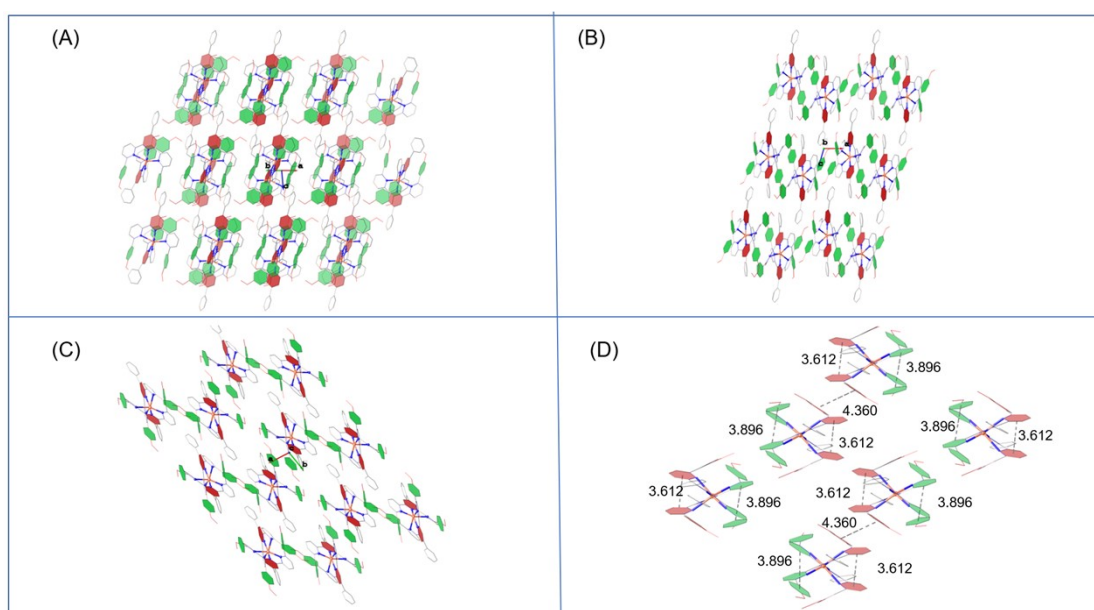

Fig. S35 The views of the  $\pi$ - $\pi$  stacking interactions of the molecule of complex L<sub>22</sub>-Zn: (a) viewed on 110 from crystal plane, (b) 010 crystal plane, (c) 001 crystal. and (d)  $\pi$ - $\pi$  stacking interactions of the molecule.



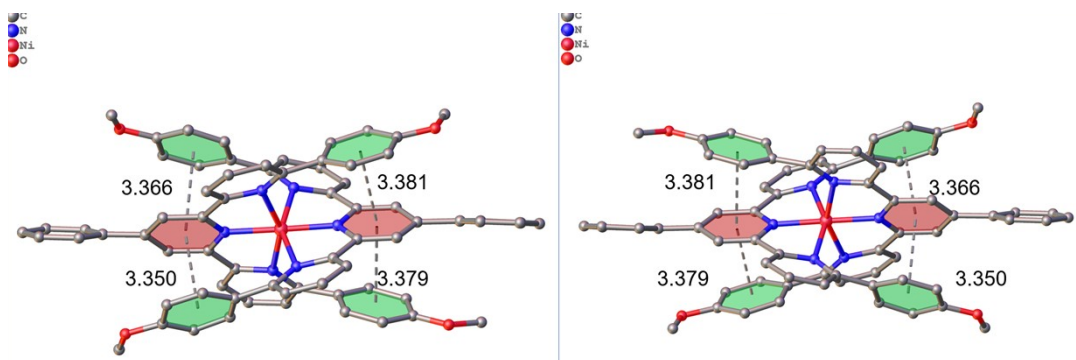

Fig. S38 P and M helical conformation extracted from the crystal structure of  $L2_2-Ni$ .

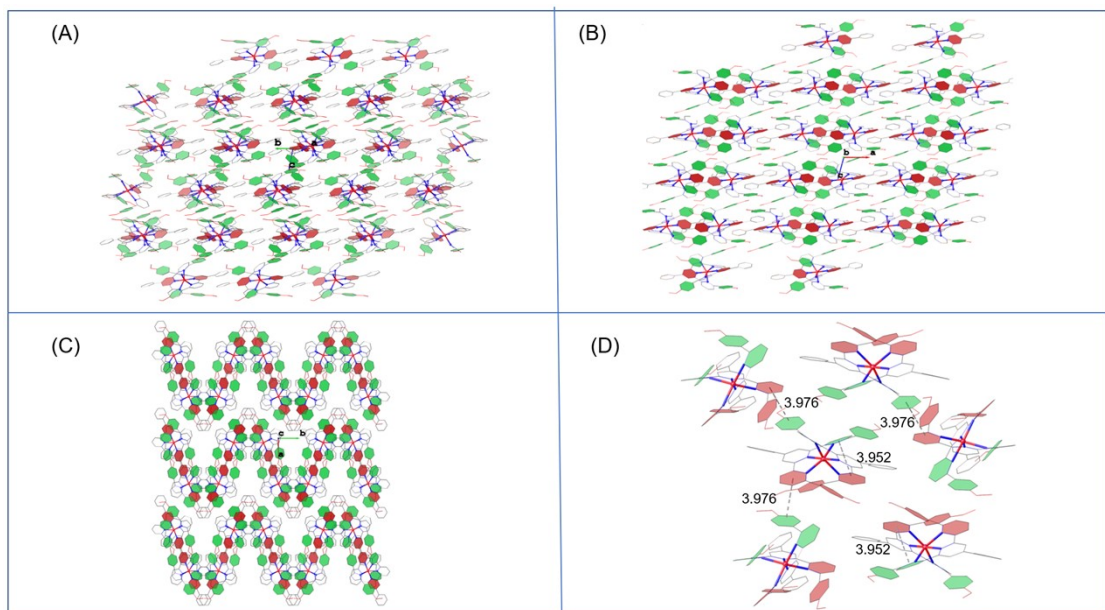

Fig. S39 The views of the  $\pi$ - $\pi$  stacking interactions of the molecule of complex  $L2_2-Ni$ : (a) viewed on 110 from crystal plane, (b) 010 crystal plane, (c) 001 crystal. and (d)  $\pi$ - $\pi$  stacking interactions of the molecule.

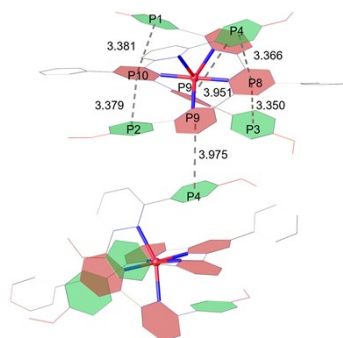

Fig. S40 The views of the intramolecular and intermolecular  $\pi$ - $\pi$  stacking interactions of the molecule  $L2_2-Ni$ .

**Table S4**  $\pi$ - $\pi$  stacking interactions in **L2<sub>2</sub>-Ni**. P1: C17 → C22 → C21 → C20 → C19 → C18 , P2: C29 → C34 → C33 → C32 → C31 → C30 , P3: C29A → C34A → C33A → C32A → C31A → C30A , P4: C17A → C22A → C21A → C20A → C19A → C18A , P5: C4 → C5 → C6 → C1 → C2 → C3 , P6: C4A → C5A → C6A → C1A → C2A → C3A , P7: N1 → C16 → C15 → C14 → C13 → C12 , P8: N2 → C10 → C11 → C7 → C8 → C9 , P9: N3 → C28 → C27 → C26 → C25 → C24 , P10: N5 → C10A → C11A → C7A → C8A → C9A , P11: N4 → C28A → C27A → C26A → C25A → C24A , P12: N6 → C16A → C15A → C14A → C13A → C12A.

| Entry | $\pi$ - $\pi$ stack | c-c(Å) | $\alpha$ (°) | $\beta$ (°) | c-plane (Å) | Slippage (Å) | Symmetry operation  |
|-------|---------------------|--------|--------------|-------------|-------------|--------------|---------------------|
| 1     | P1-P10              | 3.381  | 9.398        | 0.857       | 38.3        | 0.857        | (+X, +Y, +Z)        |
| 2     | P2-P10              | 3.391  | 9.935        | 48          | 3.297       | 0.791        | (+X, +Y, +Z)        |
| 3     | P3-P8               | 3.35   | 10.095       | 60.9        | 3.292       | 0.529        | (+X, +Y, +Z)        |
| 4     | P4-P8               | 3.366  | 8.206        | 14          | 3.355       | 0.213        | (+X, +Y, +Z)        |
| 5     | P4-P9               | 3.975  | 11.061       | 11.3        | 3.297       | 1.638        | (+X, 3/2-Y, -1/2+Z) |
| 6     | P7-P11              | 3.951  | 37.254       | 78.9        | 3.578       | 1.677        | (+X, +Y, +Z)        |

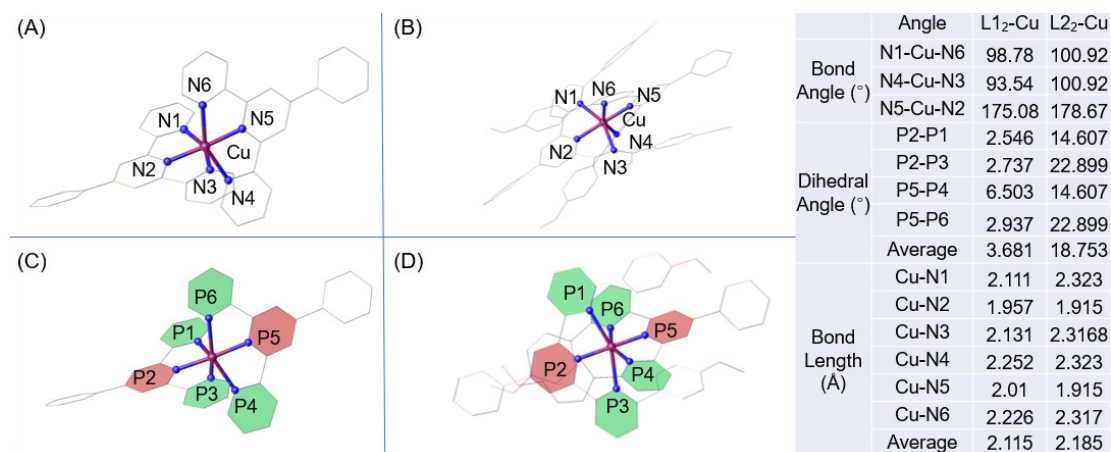

**Fig. S41** Molecular structure of **L1<sub>2</sub>-Cu** and **L2<sub>2</sub>-Cu** at room temperature.

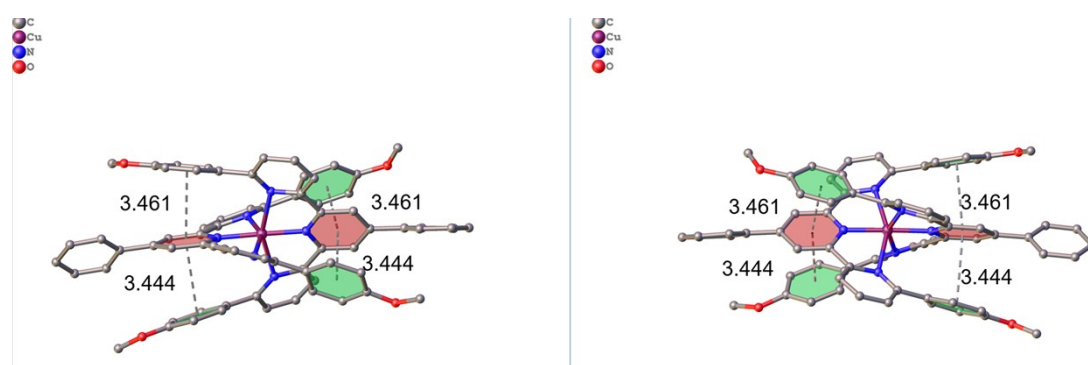

**Fig. S42** P and M helical conformation extracted from the crystal structure of **L2<sub>2</sub>-Cu**.



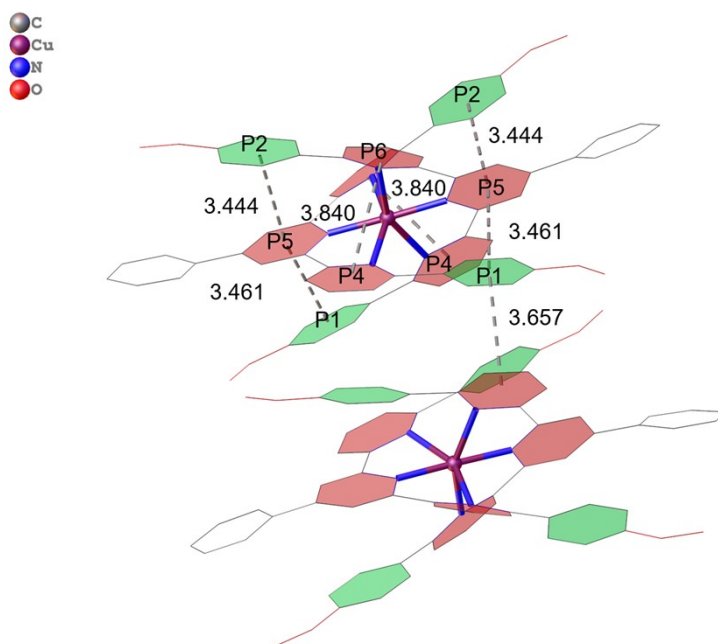

Fig. S43 The views of the intramolecular and intermolecular  $\pi$ - $\pi$  stacking interactions of the molecule  $L2_2$ -Cu.

Table S5  $\pi$ - $\pi$  stacking interactions in  $L2_2$ -Cu. P1: C20  $\rightarrow$  C21  $\rightarrow$  C22  $\rightarrow$  C17  $\rightarrow$  C18  $\rightarrow$  C19, P2: C29  $\rightarrow$  C34  $\rightarrow$  C33  $\rightarrow$  C32  $\rightarrow$  C31  $\rightarrow$  C30, P3: C4  $\rightarrow$  C36  $\rightarrow$  C01E  $\rightarrow$  C37  $\rightarrow$  C6  $\rightarrow$  C5, P4: N1  $\rightarrow$  C16  $\rightarrow$  C15  $\rightarrow$  C14  $\rightarrow$  C13  $\rightarrow$  C12, P5: N2  $\rightarrow$  C10  $\rightarrow$  C11  $\rightarrow$  C7  $\rightarrow$  C8  $\rightarrow$  C9, P6: N3  $\rightarrow$  C28  $\rightarrow$  C27  $\rightarrow$  C26  $\rightarrow$  C25  $\rightarrow$  C24.

| Entry | $\pi$ - $\pi$ stack | c-c(Å) | $\alpha$ (°) | $\beta$ (°) | c-plane (Å) | Slippage (Å) | Symmetry operation |
|-------|---------------------|--------|--------------|-------------|-------------|--------------|--------------------|
| 1     | P1-P4               | 3.657  | 7.835        | 9.18        | 3.2712      | 1.225        | (+X,3/2-Y,1-Z)     |
| 2     | P1-P5               | 3.461  | 12.858       | 36.5        | 3.2158      | 1.28         | (3/2-X,3/2-Y, +Z)  |
| 3     | P2-P5               | 3.444  | 12.593       | 49.2        | 3.4008      | 0.981        | (3/2-X,3/2-Y, +Z)  |
| 4     | P4-P6               | 3.84   | 33.953       | 70.7        | 3.5191      | 1.537        | (3/2-X,3/2-Y, +Z)  |

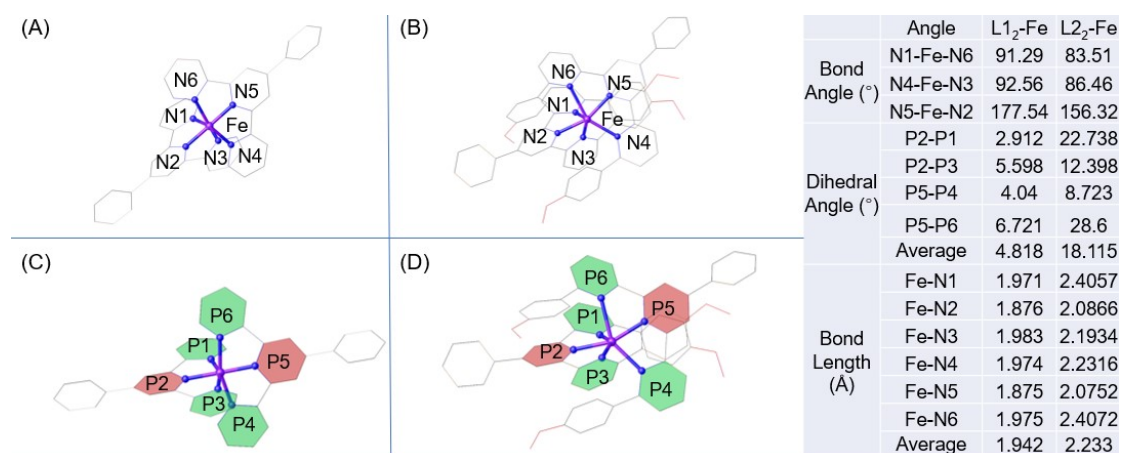

Fig. S44 Molecular structure of  $L1_2$ -Fe and  $L2_2$ -Fe at room temperature.

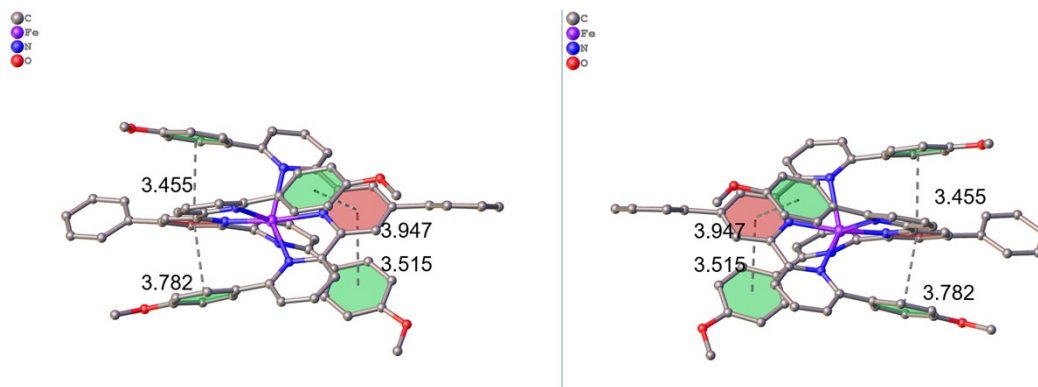

**Fig. S45** P and M helical conformation extracted from the crystal structure of **L<sub>22</sub>-Fe**.

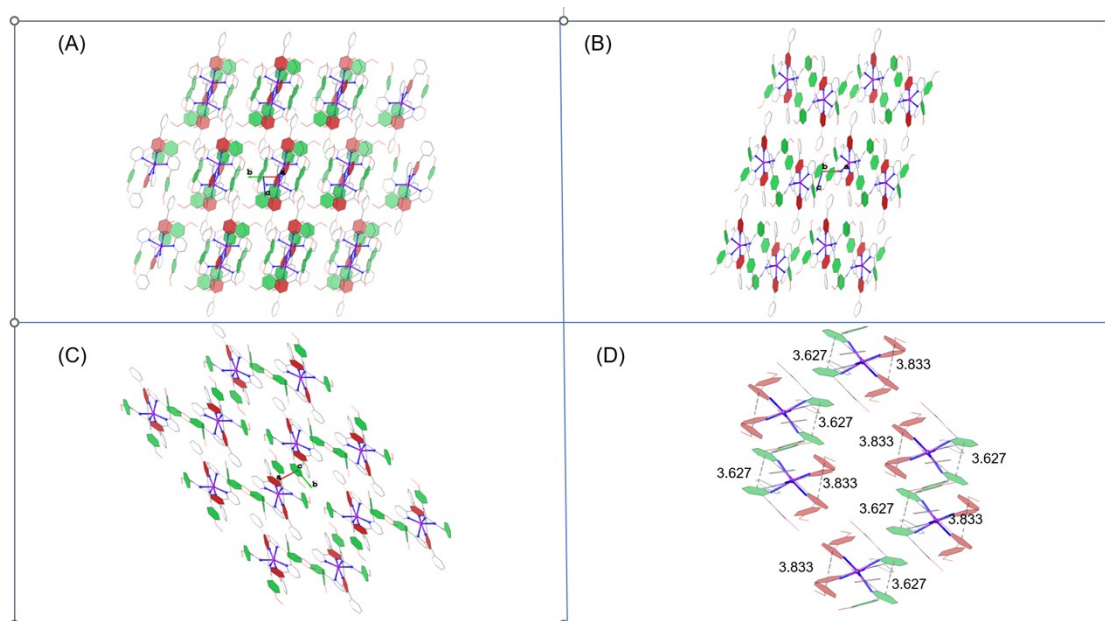

**Fig. S46** The views of the  $\pi$ - $\pi$  stacking interactions of the molecule of complex **L<sub>22</sub>-Fe**: (a) viewed on 110 from crystal plane, (b) 010 crystal plane, (c) 001 crystal. and (d)  $\pi$ - $\pi$  stacking interactions of the molecule.

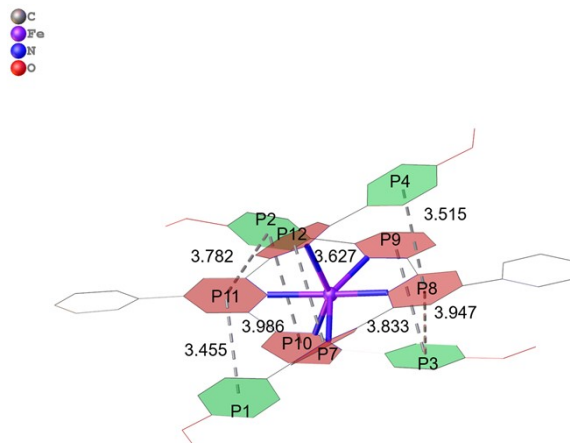

**Fig. S47** The views of the intramolecular and intermolecular  $\pi$ - $\pi$  stacking interactions of the molecule **L2<sub>2</sub>-Fe**.

**Table S6**  $\pi$ - $\pi$  stacking interactions in **L2<sub>2</sub>-Fe**. P1: C17  $\rightarrow$  C22  $\rightarrow$  C21  $\rightarrow$  C20  $\rightarrow$  C19  $\rightarrow$  C18 , P2: C29  $\rightarrow$  C34  $\rightarrow$  C33  $\rightarrow$  C32  $\rightarrow$  C31  $\rightarrow$  C30 , P3: C17A  $\rightarrow$  C22A  $\rightarrow$  C21A  $\rightarrow$  C20A  $\rightarrow$  C19A  $\rightarrow$  C18A ,P4: C29A  $\rightarrow$  C34A  $\rightarrow$  C33A  $\rightarrow$  C32A  $\rightarrow$  C31A  $\rightarrow$  C30A , P5: C4  $\rightarrow$  C5  $\rightarrow$  C6  $\rightarrow$  C1  $\rightarrow$  C2  $\rightarrow$  C3 , P6: C4A  $\rightarrow$  C5A  $\rightarrow$  C6A  $\rightarrow$  C1A  $\rightarrow$  C2A  $\rightarrow$  C3A , P7: N1  $\rightarrow$  C16  $\rightarrow$  C15  $\rightarrow$  C14  $\rightarrow$  C13  $\rightarrow$  C12 , P8: N2  $\rightarrow$  C10  $\rightarrow$  C11  $\rightarrow$  C7  $\rightarrow$  C8  $\rightarrow$  C9 , P9: N2  $\rightarrow$  C10  $\rightarrow$  C11  $\rightarrow$  C7  $\rightarrow$  C8  $\rightarrow$  C9 , P10: N4  $\rightarrow$  C28A  $\rightarrow$  C27A  $\rightarrow$  C26A  $\rightarrow$  C25A  $\rightarrow$  C24A, p11: N5  $\rightarrow$  C10A  $\rightarrow$  C11A  $\rightarrow$  C7A  $\rightarrow$  C8A  $\rightarrow$  C9A , P12: N6  $\rightarrow$  C16A  $\rightarrow$  C15A  $\rightarrow$  C14A  $\rightarrow$  C13A  $\rightarrow$  C12A.

| Entry | $\pi$ - $\pi$ stack | c-c(Å) | $\alpha$ (°) | $\beta$ (°) | c-plane (Å) | Slippage (Å) | Symmetry operation |
|-------|---------------------|--------|--------------|-------------|-------------|--------------|--------------------|
| 1     | P1-P11              | 3.455  | 4.553        | 13.4        | 3.248       | 1.179        | (+X, +Y, +Z)       |
| 2     | P2-P10              | 3.986  | 2.562        | 1.53        | 3.277       | 2.404        | (+X, +Y, +Z)       |
| 3     | P2-P11              | 3.782  | 10.407       | 19.57       | 3.2019      | 1.833        | (+X, +Y, +Z)       |
| 4     | P3-P8               | 3.947  | 13.292       | 22.3        | 3.221       | 2.391        | (+X, +Y, +Z)       |
| 5     | P3-P9               | 3.833  | 1.562        | 2.08        | 3.8326      | 1.868        | (+X, +Y, +Z)       |
| 6     | P4-P8               | 3.515  | 5.541        | 3.97        | 3.2831      | 1.554        | (+X, +Y, +Z)       |
| 7     | P7-P12              | 3.515  | 5.541        | 77.5        | 3.5141      | 0.897        | (+X, +Y, +Z)       |



**Table S7** The bond angles of complex **L1<sub>2</sub>-M** and complex **L2<sub>2</sub>-M**.

| Complex            | L1 <sub>2</sub> -Ni | L2 <sub>2</sub> -Ni | L1 <sub>2</sub> -Fe | L2 <sub>2</sub> -Fe | L1 <sub>2</sub> -Cu | L2 <sub>2</sub> -Cu |
|--------------------|---------------------|---------------------|---------------------|---------------------|---------------------|---------------------|
| N (5)- M (1)-N (2) | 178.75              | 177.8               | 177.54              | 156.32              | 175.08              | 178.67              |
| N (5)-M (1)-N (1)  | 103.04              | 103.7               | 100.8               | 89.81               | 89.81               | 77.3                |
| N (2)-M (1)-N (1)  | 78.13               | 77.4                | 81.31               | 72.85               | 78.9                | 78.093              |
| N (5)-M (1)-N (4)  | 78.36               | 77.3                | 81.45               | 75.55               | 76.8                | 78.093              |
| N (2)-M (1)-N (4)  | 101.2               | 104.8               | 97.33               | 123.71              | 102.41              | 102.7               |
| N (1)-M (1)-N (4)  | 93.4                | 80.5                | 89.74               | 104.47              | 90.74               | 71.317              |
| N (5)-M (1)-N (6)  | 78.17               | 77.2                | 81.24               | 73                  | 76.58               | 78.357              |
| N (2)-M (1)-N (6)  | 92.85               | 100.7               | 100.05              | 88.78               | 104.69              | 100.799             |
| N (1)-M (1)-N (6)  | 92.85               | 103.9               | 91.29               | 83.51               | 98.78               | 100.924             |
| N (6)-M (1)-N (4)  | 156.5               | 154.5               | 162.54              | 147.51              | 152.52              | 156.312             |
| N (5)-M (1)-N (3)  | 100.38              | 101                 | 96.62               | 122.4               | 106.5               | 100.799             |
| N (2)-M (1)-N (3)  | 78.45               | 78                  | 81.27               | 75.89               | 78.37               | 78.357              |
| N (1)-M (1)-N (3)  | 156.57              | 155.3               | 162.58              | 147.77              | 157.26              | 156.312             |
| N (4)-M (1)-N (3)  | 91.79               | 104.1               | 92.56               | 86.46               | 93.54               | 100.924             |
| N (6)-M (1)-N (3)  | 91.41               | 82.5                | 91.66               | 103.58              | 87.55               | 77.055              |
| Complex            | L1 <sub>2</sub> -Zn | L2 <sub>2</sub> -Zn | L1 <sub>2</sub> -Co | L2 <sub>2</sub> -Co | L1 <sub>2</sub> -Mn | L2 <sub>2</sub> -Mn |
| N (5)- M (1)-N (2) | 170.893             | 152.16              | 177.292             | 169.17              | 170.159             | 175.19              |
| N (5)-M (1)-N (1)  | 67.672              | 86.97               | 98.103              | 112.165             | 113.307             | 102.8               |
| N (2)-M (1)-N (1)  | 76.866              | 72.33               | 79.879              | 76.299              | 72.695              | 72.46               |
| N (5)-M (1)-N (4)  | 75.865              | 72.69               | 79.838              | 75.706              | 72.595              | 73.68               |
| N (2)-M (1)-N (4)  | 76.036              | 86.33               | 101.985             | 95.563              | 114.999             | 108.25              |
| N (1)-M (1)-N (4)  | 87.584              | 83.51               | 88.758              | 72.589              | 98.843              | 106.96              |
| N (5)-M (1)-N (6)  | 76.133              | 78.26               | 80.812              | 75.814              | 71.976              | 72.96               |
| N (2)-M (1)-N (6)  | 104.603             | 123.42              | 97.43               | 112.855             | 100.261             | 108.25              |
| N (1)-M (1)-N (6)  | 92.83               | 101.92              | 92.603              | 97.717              | 85.356              | 80.63               |
| N (6)-M (1)-N (4)  | 151.407             | 150.14              | 160.529             | 151.488             | 144.569             | 146.65              |
| N (5)-M (1)-N (3)  | 95.773              | 122.59              | 102.089             | 97.505              | 101.37              | 110.95              |
| N (2)-M (1)-N (3)  | 75.121              | 78.78               | 79.983              | 74.449              | 72.388              | 73.8                |
| N (1)-M (1)-N (3)  | 151.913             | 150.31              | 159.034             | 150.29              | 145.077             | 146.24              |
| N (4)-M (1)-N (3)  | 92.333              | 101.61              | 90.071              | 99.365              | 84.823              | 82.71               |
| N (6)-M (1)-N (3)  | 83.896              | 88.15               | 89.92               | 75.568              | 92.09               | 109.29              |

**Table S8** The bond lengths of complexes **L1<sub>2</sub>-M** and **L2<sub>2</sub>-M**.

| Complex | L1 <sub>2</sub> -Ni | L2 <sub>2</sub> -Ni | L1 <sub>2</sub> -Fe | L2 <sub>2</sub> -Fe | L1 <sub>2</sub> -Cu | L2 <sub>2</sub> -Cu |
|---------|---------------------|---------------------|---------------------|---------------------|---------------------|---------------------|
| M1-N1   | 2.082               | 2.282               | 1.971               | 2.4057              | 2.111               | 2.323               |
| M1-N2   | 1.952               | 1.967               | 1.876               | 2.0866              | 1.957               | 1.915               |
| M1-N3   | 2.073               | 2.242               | 1.983               | 2.1934              | 2.131               | 2.3168              |
| M1-N4   | 2.083               | 2.218               | 1.974               | 2.2316              | 2.252               | 2.323               |
| M1-N5   | 1.954               | 1.972               | 1.875               | 2.0752              | 2.01                | 1.915               |
| M1-N6   | 2.076               | 2.253               | 1.975               | 2.4072              | 2.226               | 2.317               |
| Complex | L1 <sub>2</sub> -Zn | L2 <sub>2</sub> -Zn | L1 <sub>2</sub> -Co | L2 <sub>2</sub> -Co | L1 <sub>2</sub> -Mn | L2 <sub>2</sub> -Mn |
| M1-N1   | 2.139               | 2.5059              | 2.088               | 2.21                | 2.243               | 2.409               |
| M1-N2   | 2.0676              | 2.0272              | 1.888               | 2.02                | 2.184               | 2.148               |
| M1-N3   | 2.223               | 2.1441              | 2.079               | 2.351               | 2.254               | 2.322               |
| M1-N4   | 2.193               | 2.4996              | 2.058               | 2.347               | 2.221               | 2.332               |
| M1-N5   | 2.0566              | 2.013               | 1.88                | 2.029               | 2.186               | 2.133               |
| M1-N6   | 2.184               | 2.1867              | 2.047               | 2.238               | 2.245               | 2.356               |

**Table S9** Selected geometric parameters of Complex **L1<sub>2</sub>-M** and Complex **L2<sub>2</sub>-M**

|                                                       | CoL <sub>2</sub> (PF <sub>6</sub> ) <sub>2</sub> (H <sub>2</sub> O) <sub>4</sub><br>C <sub>70</sub> H <sub>54</sub> CoF <sub>12</sub> N <sub>6</sub> O <sub>4</sub> P <sub>2</sub>                | CuL <sub>2</sub> (NO <sub>3</sub> ) <sub>2</sub> (H <sub>2</sub> O) <sub>4</sub><br>C <sub>70</sub> H <sub>54</sub> CuN <sub>8</sub> O <sub>10</sub>                                | FeL <sub>2</sub> (PF <sub>6</sub> ) <sub>2</sub> (CH <sub>3</sub> CN) <sub>1.5</sub><br>C <sub>73</sub> H <sub>58.50</sub> F <sub>12</sub> FeN <sub>7.5</sub> O <sub>4</sub> P <sub>2</sub> | MnL <sub>2</sub> (NTF) <sub>2</sub><br>C <sub>74</sub> H <sub>54</sub> F <sub>12</sub> MnN <sub>8</sub> O <sub>12</sub> S <sub>4</sub> |
|-------------------------------------------------------|---------------------------------------------------------------------------------------------------------------------------------------------------------------------------------------------------|-------------------------------------------------------------------------------------------------------------------------------------------------------------------------------------|---------------------------------------------------------------------------------------------------------------------------------------------------------------------------------------------|----------------------------------------------------------------------------------------------------------------------------------------|
| Formulate                                             |                                                                                                                                                                                                   |                                                                                                                                                                                     |                                                                                                                                                                                             |                                                                                                                                        |
| M                                                     | 1392.06                                                                                                                                                                                           | 1230.75                                                                                                                                                                             | 1450.56                                                                                                                                                                                     | 1658.43                                                                                                                                |
| Crystal system                                        | monoclinic                                                                                                                                                                                        | tetragonal                                                                                                                                                                          | monoclinic                                                                                                                                                                                  | monoclinic                                                                                                                             |
| Space group                                           | P2 <sub>1</sub> /c                                                                                                                                                                                | P42/nbc                                                                                                                                                                             | P -1                                                                                                                                                                                        | P121/c1                                                                                                                                |
| a/Å                                                   | 18.2116(5)                                                                                                                                                                                        | 19.5981(3)                                                                                                                                                                          | 14.7837(2)                                                                                                                                                                                  | 16.4958(5)                                                                                                                             |
| b/Å                                                   | 24.5320(6)                                                                                                                                                                                        | 19.5981(3)                                                                                                                                                                          | 15.5793(3)                                                                                                                                                                                  | 20.9832(7)                                                                                                                             |
| c/Å                                                   | 15.6483(4)                                                                                                                                                                                        | 33.1820(9)                                                                                                                                                                          | 15.76050(10)                                                                                                                                                                                | 41.0349(14)                                                                                                                            |
| α/°                                                   | 90                                                                                                                                                                                                | 90                                                                                                                                                                                  | 110.3520(10)                                                                                                                                                                                | 90                                                                                                                                     |
| β/°                                                   | 105.614(3)                                                                                                                                                                                        | 90                                                                                                                                                                                  | 102.5600(10)                                                                                                                                                                                | 93.595(3)                                                                                                                              |
| γ/°                                                   | 90                                                                                                                                                                                                | 90                                                                                                                                                                                  | 96.5360(10)                                                                                                                                                                                 | 90                                                                                                                                     |
| V/Å <sup>3</sup>                                      | 6733.1(3)                                                                                                                                                                                         | 12744.7(5)                                                                                                                                                                          | 3249.93(8)                                                                                                                                                                                  | 14175.7(8)                                                                                                                             |
| D/g cm <sup>-3</sup>                                  | 1.373                                                                                                                                                                                             | 1.283                                                                                                                                                                               | 1.482                                                                                                                                                                                       | 1.554                                                                                                                                  |
| Z                                                     | 4                                                                                                                                                                                                 | 8                                                                                                                                                                                   | 2                                                                                                                                                                                           | 8                                                                                                                                      |
| Colour                                                | light yellow                                                                                                                                                                                      | blackish black                                                                                                                                                                      | light orange                                                                                                                                                                                | light colorless                                                                                                                        |
| Habit                                                 | needle                                                                                                                                                                                            | prism                                                                                                                                                                               | prism                                                                                                                                                                                       | block                                                                                                                                  |
| Dimensions/mm                                         | 0.04x0.02x0.01                                                                                                                                                                                    | 0.2x0.13x0.11                                                                                                                                                                       | 0.2x0.1x0.06                                                                                                                                                                                | 0.14x0.12x0.11                                                                                                                         |
| m(Mo/Cu Ka)/mm <sup>-1</sup>                          | 0.77                                                                                                                                                                                              | 0.82                                                                                                                                                                                | 0.8                                                                                                                                                                                         | 0.72                                                                                                                                   |
| T <sub>max,min</sub>                                  | 1.000, 0.60401                                                                                                                                                                                    | 0.0835, 0.0112                                                                                                                                                                      | 1.000, 0.67645                                                                                                                                                                              | 0.957x 0.945                                                                                                                           |
| N <sub>ind</sub> (Rint)                               | -0.0999                                                                                                                                                                                           | -0.0282                                                                                                                                                                             | 46115,(0.0496)                                                                                                                                                                              | 33790 (0.0556)                                                                                                                         |
| R1 <sup>a</sup> ωR2 <sup>a</sup>                      | 0.1954,0.2020                                                                                                                                                                                     | 0.1856, 0.1907                                                                                                                                                                      | 0.1312, 0.1344                                                                                                                                                                              | 0.1451, 0.1820                                                                                                                         |
| GoF                                                   | 1.16                                                                                                                                                                                              | 1.059                                                                                                                                                                               | 1.005                                                                                                                                                                                       | 1.047                                                                                                                                  |
| Δρ <sub>min,max</sub> /e <sup>-</sup> Å <sup>-3</sup> | (-)0.678, 0.096                                                                                                                                                                                   | (-)0.835, 0.094                                                                                                                                                                     | (-)0.682, 0.900                                                                                                                                                                             | (-)0.595, 0.533                                                                                                                        |
| CCDC                                                  | 2170550                                                                                                                                                                                           | 2170552                                                                                                                                                                             | 2170554                                                                                                                                                                                     | 2169764                                                                                                                                |
|                                                       | NiL <sub>2</sub> (CF <sub>3</sub> SO <sub>3</sub> ) <sub>2</sub> (H <sub>2</sub> O) <sub>4</sub><br>C <sub>72</sub> H <sub>54</sub> F <sub>6</sub> N <sub>6</sub> Ni <sub>10</sub> S <sub>2</sub> | ZnL <sub>2</sub> (PF <sub>6</sub> ) <sub>2</sub> (H <sub>2</sub> O) <sub>4</sub><br>C <sub>74</sub> H <sub>60</sub> F <sub>12</sub> N <sub>8</sub> O <sub>4</sub> P <sub>2</sub> Zn | CoL <sub>1</sub> (PF <sub>6</sub> ) <sub>2</sub> H <sub>2</sub> O<br>C <sub>42</sub> H <sub>31</sub> CoF <sub>12</sub> N <sub>6</sub> P <sub>2</sub>                                        |                                                                                                                                        |
| Formulate                                             |                                                                                                                                                                                                   |                                                                                                                                                                                     |                                                                                                                                                                                             |                                                                                                                                        |
| M                                                     | 1400.04                                                                                                                                                                                           | 1480.61                                                                                                                                                                             | 993.11                                                                                                                                                                                      |                                                                                                                                        |
| Crystal system                                        | monoclinic                                                                                                                                                                                        | triclinic                                                                                                                                                                           | triclinic                                                                                                                                                                                   |                                                                                                                                        |
| Space group                                           | P121/c 1                                                                                                                                                                                          | P -1                                                                                                                                                                                | P -1                                                                                                                                                                                        |                                                                                                                                        |
| a/Å                                                   | 20.0030(14)                                                                                                                                                                                       | 14.82536(16)                                                                                                                                                                        | 13.42                                                                                                                                                                                       |                                                                                                                                        |
| b/Å                                                   | 19.9002(11)                                                                                                                                                                                       | 15.58807(16)                                                                                                                                                                        | 17.5883                                                                                                                                                                                     |                                                                                                                                        |
| c/Å                                                   | 17.2847(11)                                                                                                                                                                                       | 15.76441(18)                                                                                                                                                                        | 17.7353                                                                                                                                                                                     |                                                                                                                                        |
| α/°                                                   | 90                                                                                                                                                                                                | 110.6557(10)                                                                                                                                                                        | 100.794(1)                                                                                                                                                                                  |                                                                                                                                        |
| β/°                                                   | 105.098(7)                                                                                                                                                                                        | 96.7606(9)                                                                                                                                                                          | 93.906(1)                                                                                                                                                                                   |                                                                                                                                        |
| γ/°                                                   | 90                                                                                                                                                                                                | 96.7606(9)                                                                                                                                                                          | 94.420(1)                                                                                                                                                                                   |                                                                                                                                        |
| V/Å <sup>3</sup>                                      | 6642.9(8)                                                                                                                                                                                         | 3251.48(7)                                                                                                                                                                          | 4085.27(7)                                                                                                                                                                                  |                                                                                                                                        |
| D/g cm <sup>-3</sup>                                  | 1.4                                                                                                                                                                                               | 1.512                                                                                                                                                                               | 1.615                                                                                                                                                                                       |                                                                                                                                        |
| Z                                                     | 4                                                                                                                                                                                                 | 2                                                                                                                                                                                   | 4                                                                                                                                                                                           |                                                                                                                                        |
| Color                                                 | light green                                                                                                                                                                                       | light colorless                                                                                                                                                                     | clear dark orange                                                                                                                                                                           |                                                                                                                                        |
| Habit                                                 | needle                                                                                                                                                                                            | block                                                                                                                                                                               | plate                                                                                                                                                                                       |                                                                                                                                        |
| Dimensions/mm                                         | 0.13x0.12x0.1                                                                                                                                                                                     | 0.14x0.12x0.1                                                                                                                                                                       | 0.4x0.02x0.08                                                                                                                                                                               |                                                                                                                                        |
| m(Mo/Cu Ka)/mm <sup>-1</sup>                          | 0.84                                                                                                                                                                                              | 0.8                                                                                                                                                                                 | 4.926                                                                                                                                                                                       |                                                                                                                                        |
| T <sub>max,min</sub>                                  | 1.00000, 0.93349                                                                                                                                                                                  | 0.840, 0.786                                                                                                                                                                        | 1.0, 1.7350                                                                                                                                                                                 |                                                                                                                                        |
| N <sub>ind</sub> (Rint)                               | 0.1337                                                                                                                                                                                            | 0.0335                                                                                                                                                                              | 0.076                                                                                                                                                                                       |                                                                                                                                        |
| R1 <sup>a</sup> ωR2 <sup>a</sup>                      | 0.1899, 0.2610                                                                                                                                                                                    | 0.0453, 0.0422                                                                                                                                                                      | 0.1383, 0.1437                                                                                                                                                                              |                                                                                                                                        |
| GoF                                                   | 1.022                                                                                                                                                                                             | 1.036                                                                                                                                                                               | 1.0066                                                                                                                                                                                      |                                                                                                                                        |
| Δρ <sub>min,max</sub> /e <sup>-</sup> Å <sup>-3</sup> | (-)0.592, 0.999                                                                                                                                                                                   | 0.1188, 0.1216                                                                                                                                                                      | 0.723, -0.632                                                                                                                                                                               |                                                                                                                                        |
| CCDC                                                  | 2170551                                                                                                                                                                                           | 2170553                                                                                                                                                                             | 2210926                                                                                                                                                                                     |                                                                                                                                        |

**Table S10** The results of octahedral distortion calculator

| Complex             | $d_{\text{mean}}$ | $\zeta$  | $\Sigma$ | $\Theta$ |
|---------------------|-------------------|----------|----------|----------|
| L2 <sub>2</sub> -Ni | 2.1557            | 0.744414 | 145.3703 | 409.5689 |
| L2 <sub>2</sub> -Cu | 2.1852            | 1.079147 | 147.5754 | 424.6856 |
| L2 <sub>2</sub> -Co | 2.1994            | 0.698146 | 164.777  | 498.798  |
| L2 <sub>2</sub> -Mn | 2.299             | 0.584451 | 195.7073 | 562.8937 |
| L2 <sub>2</sub> -Zn | 2.2294            | 1.093747 | 162.5358 | 599.4113 |
| L2 <sub>2</sub> -Fe | 2.2333            | 0.692646 | 168.3102 | 633.2856 |

$d_{\text{mean}}$  which refers to the average metal–ligand distances in the octahedral coordination sphere. The parameter  $\zeta$  is the sum of the deviation of 6 unique metal–ligand bond lengths around the central metal atom ( $d_i$ ) from the average value ( $d_{\text{mean}}$ ). The parameter  $\Sigma$  is the sum of the deviation of 12 unique cis ligand–metal–ligand angles ( $\phi_i$ ) from 90°. The parameter  $\Theta$  is the sum of the deviation of 24 unique torsional angles between the ligand atoms on opposite triangular faces of the octahedron viewed along the pseudo-threefold axis ( $\theta_i$ ) from 60°.

## Photophysical properties

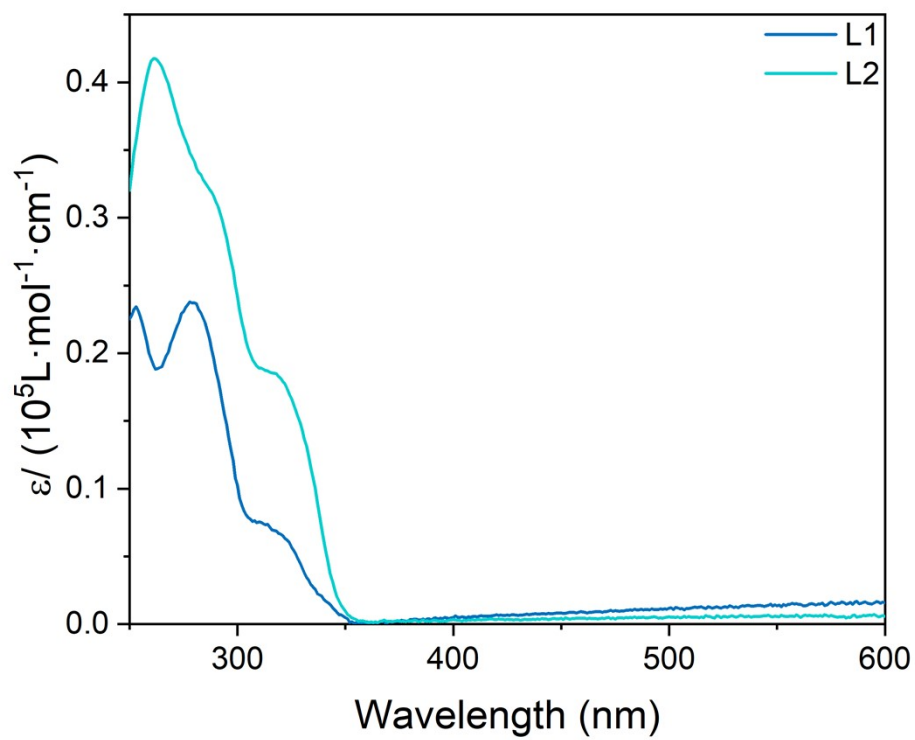

**Fig. S48** UV-vis spectra of ligand **L2** ( $c = 1 \times 10^{-5} \text{ M}$ ) in  $\text{CH}_2\text{Cl}_2$ .

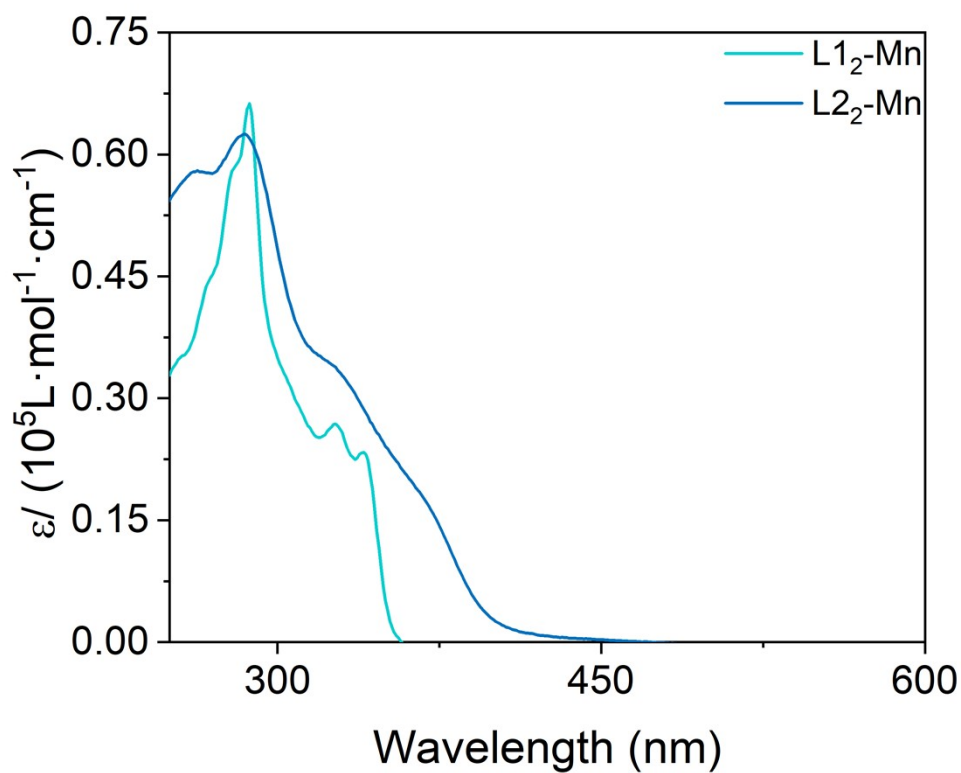

Fig. S49 UV-vis spectra of complex  $L1_2-Mn$  and  $L2_2-Mn$  ( $c = 1 \times 10^{-5} M$ ) in  $CH_3CN$ .

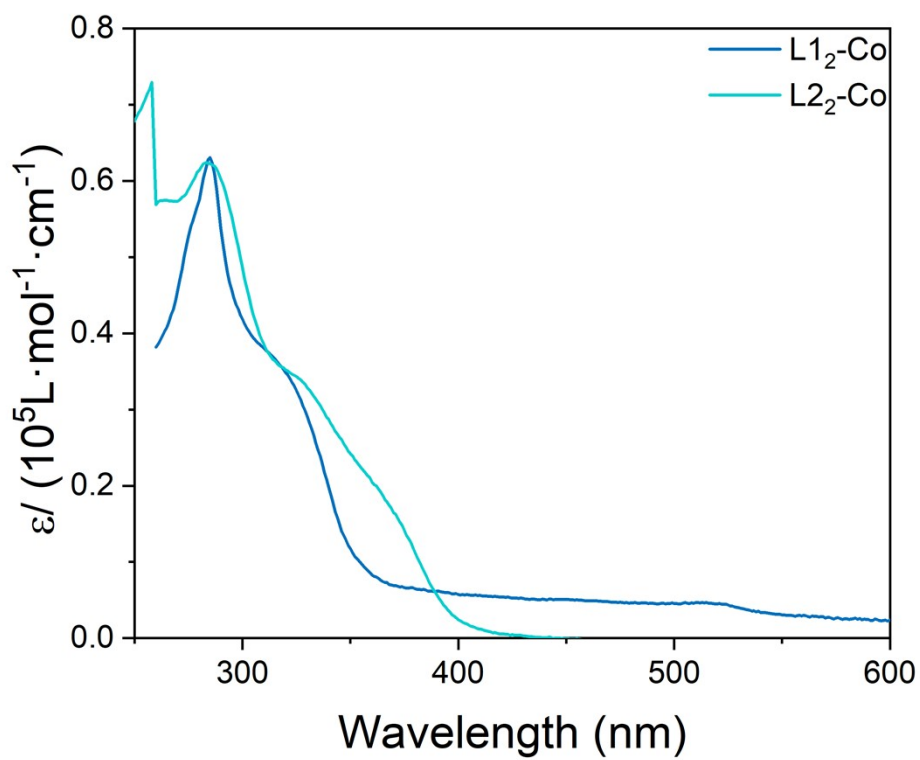

Fig. S50 UV-vis of spectra complex  $L1_2-Co$  and  $L2_2-Co$  ( $c = 1 \times 10^{-5} M$ ) in  $CH_3CN$ .

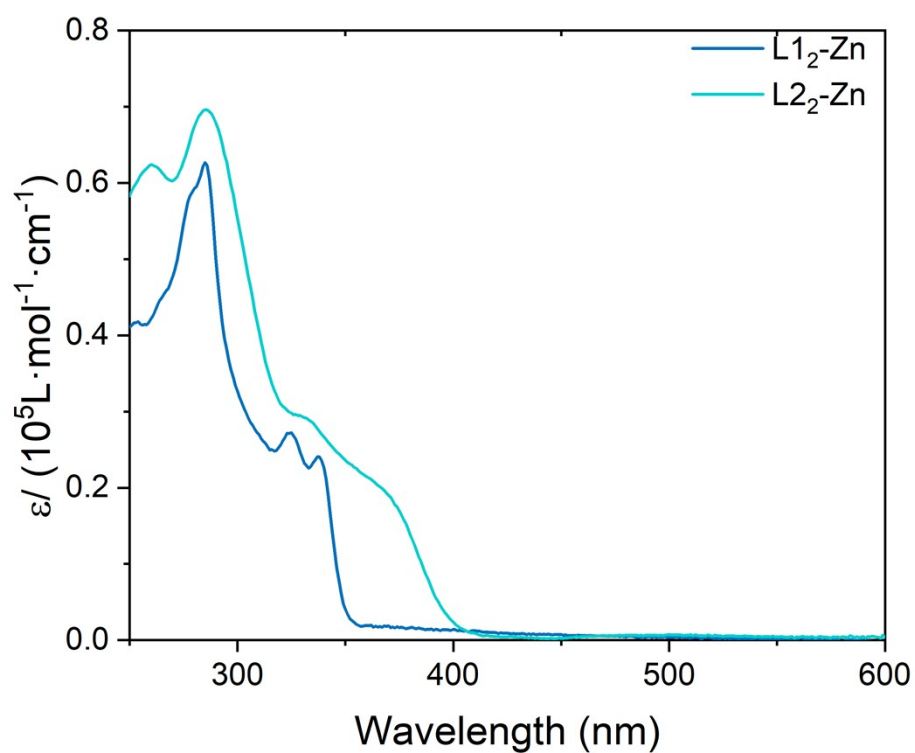

Fig. S51 UV-vis of spectra complex L1<sub>2</sub>-Zn and L2<sub>2</sub>-Zn ( $c = 1 \times 10^{-5}$  M) in CH<sub>3</sub>CN.

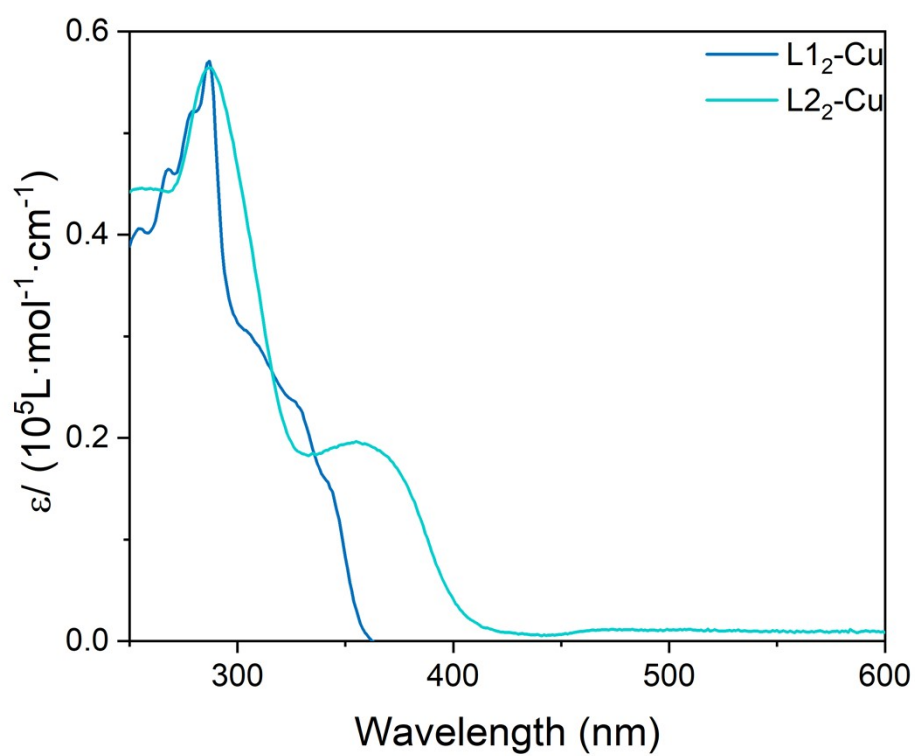

Fig. S52 UV-vis of spectra complex L1<sub>2</sub>-Cu and L2<sub>2</sub>-Cu ( $c = 1 \times 10^{-5}$  M) in CH<sub>3</sub>CN.

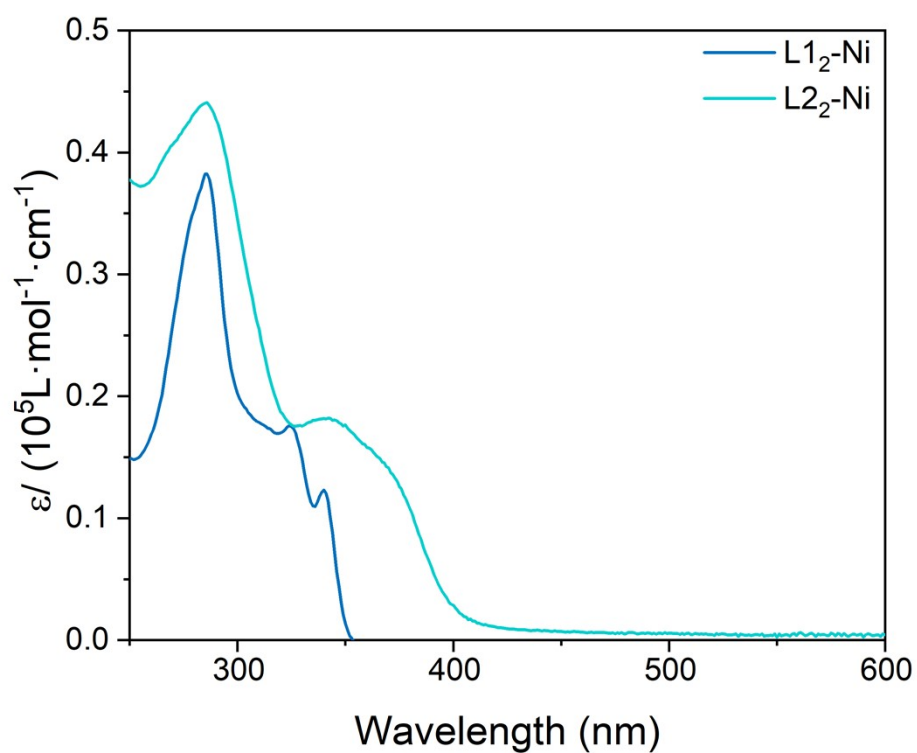

Fig. S53 UV-vis spectra of complex L1<sub>2</sub>-Ni and L2<sub>2</sub>-Ni ( $c = 1 \times 10^{-5}$  M) in CH<sub>3</sub>CN.

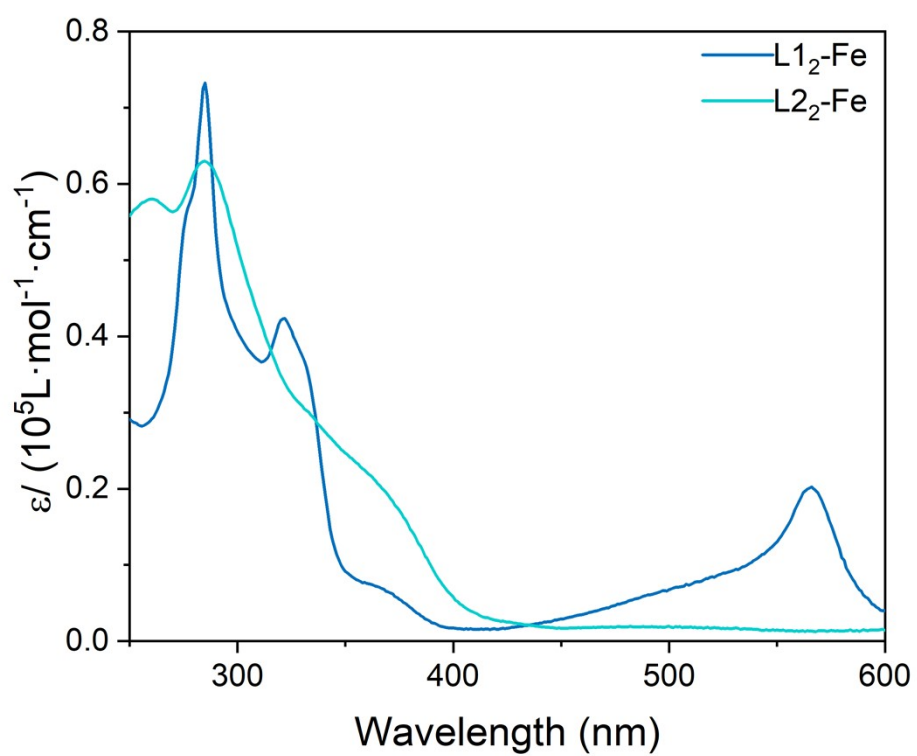

Fig. S54 UV-vis spectra of complex L1<sub>2</sub>-Fe and L2<sub>2</sub>-Fe ( $c = 1 \times 10^{-5}$  M) in CH<sub>3</sub>CN.



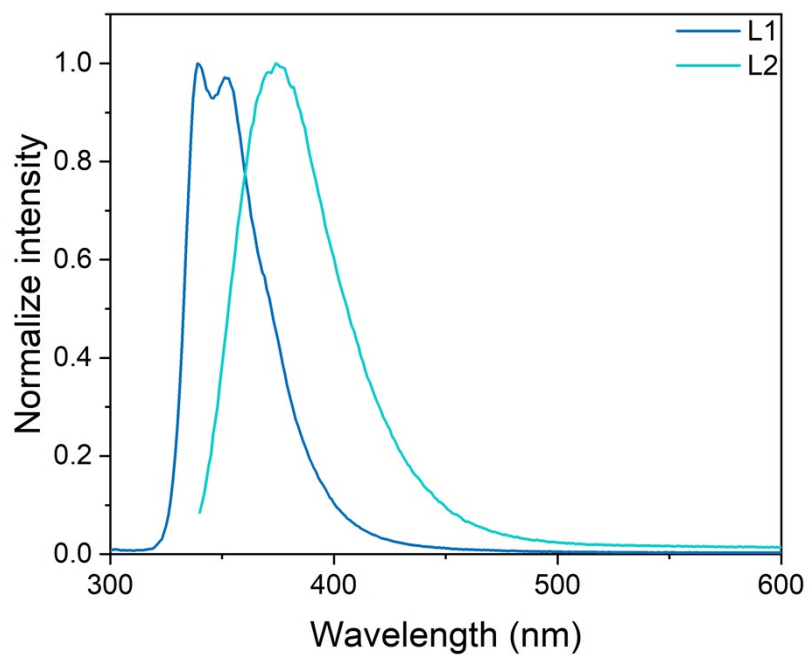

**Fig. S55** Normalized fluorescence spectra of ligand **L1** ( $\lambda_{\text{ex}} = 276\text{nm}$ ,  $c = 1 \times 10^{-5}\text{M}$ ) and **L2** ( $\lambda_{\text{ex}} = 320\text{ nm}$ ,  $c = 1 \times 10^{-5}\text{M}$ ) in  $\text{CH}_2\text{Cl}_2$ .

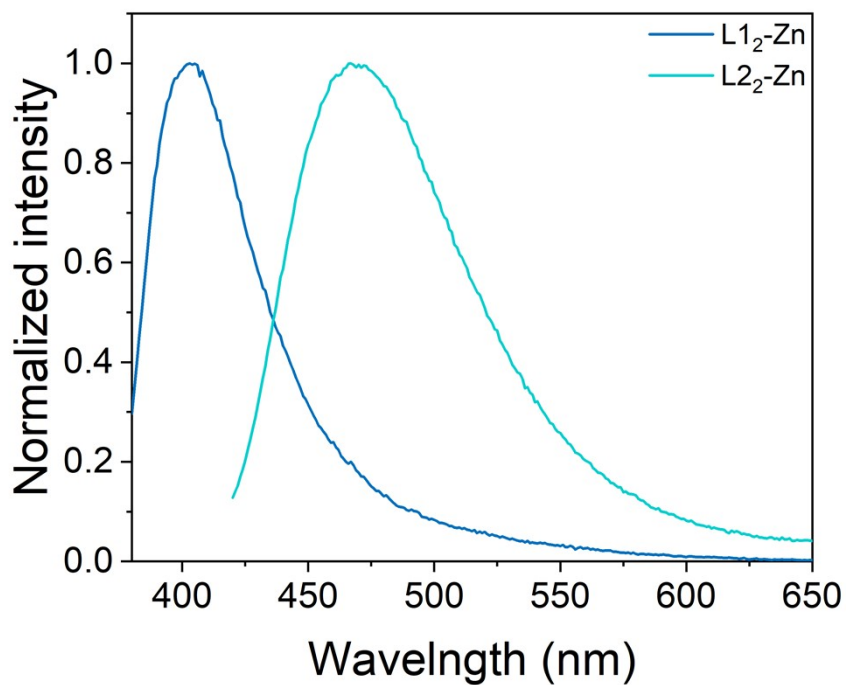

**Fig. S56** Normalized spectra of complex **L1<sub>2</sub>-Zn** ( $\lambda_{\text{ex}} = 355\text{ nm}$ ) and **L2<sub>2</sub>-Zn** ( $\lambda_{\text{ex}} = 410\text{ nm}$ ) in solid state.



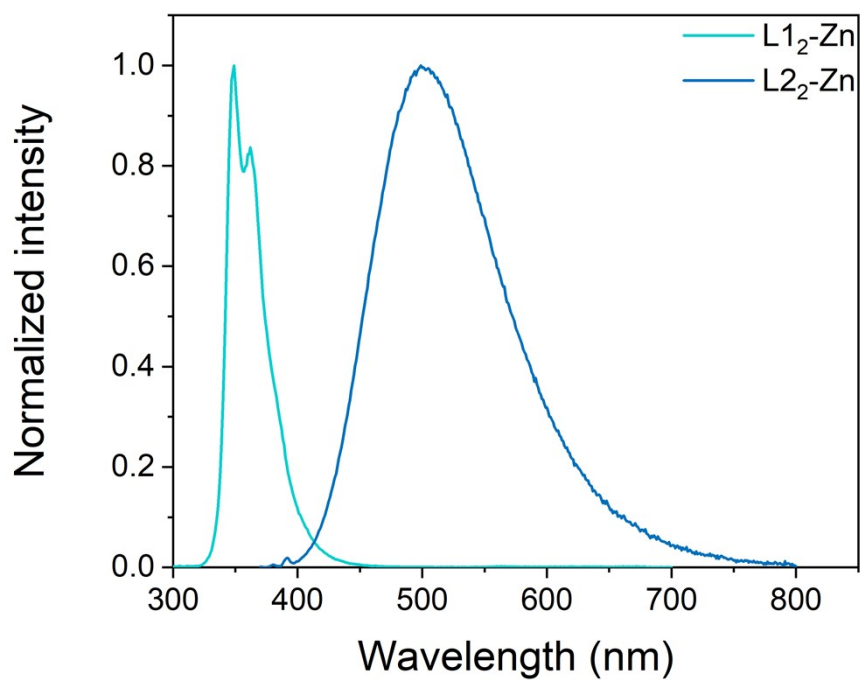

**Fig. S57** Normalized fluorescence spectra of complex **L1<sub>2</sub>-Zn** ( $\lambda_{\text{ex}} = 280 \text{ nm}$ ,  $c = 1 \times 10^{-5} \text{ M}$ ) and **L2<sub>2</sub>-Zn** ( $\lambda_{\text{ex}} = 350 \text{ nm}$ ,  $c = 1 \times 10^{-5} \text{ M}$ ) in  $\text{CH}_3\text{CN}$ .

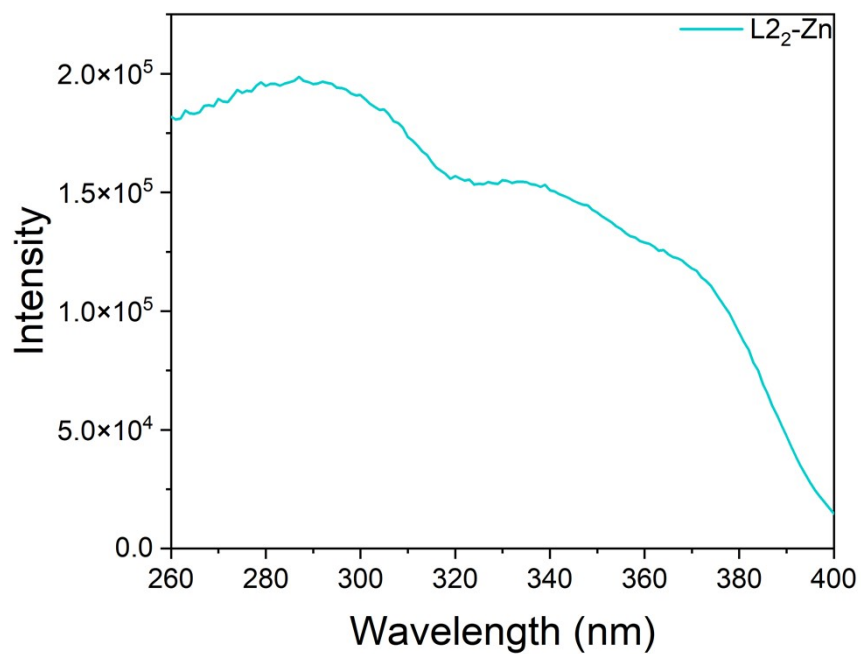

**Fig. S58** Fluorescence excitation spectra of complex **L2<sub>2</sub>-Zn** ( $\lambda_{\text{em}} = 500 \text{ nm}$ ,  $c = 1 \times 10^{-5} \text{ M}$ ) in  $\text{CH}_3\text{CN}$ .

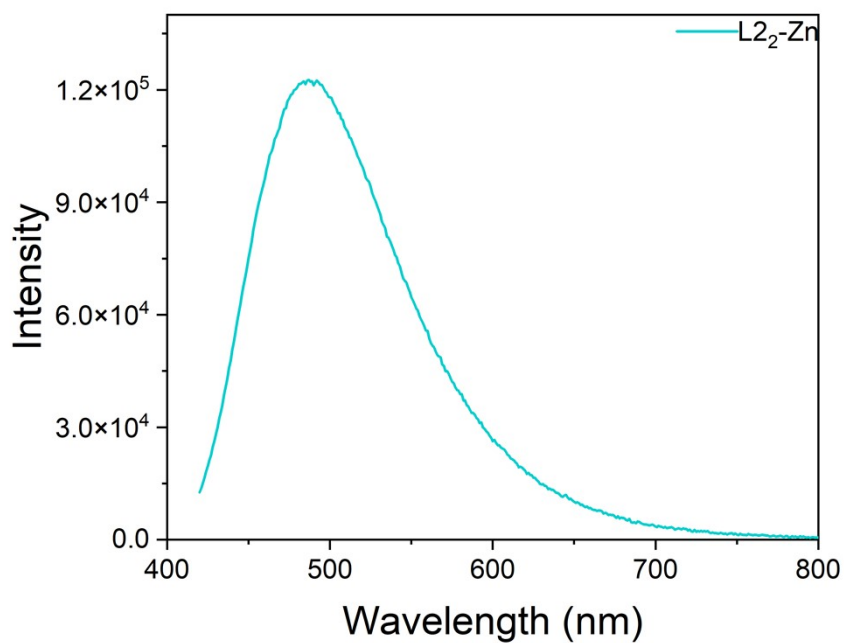

Fig. S59 Fluorescence spectra of complex **L<sub>2</sub>-Zn** ( $\lambda_{\text{ex}} = 400$  nm,  $c = 1 \times 10^{-5}$  M) in CH<sub>2</sub>Cl<sub>2</sub>.

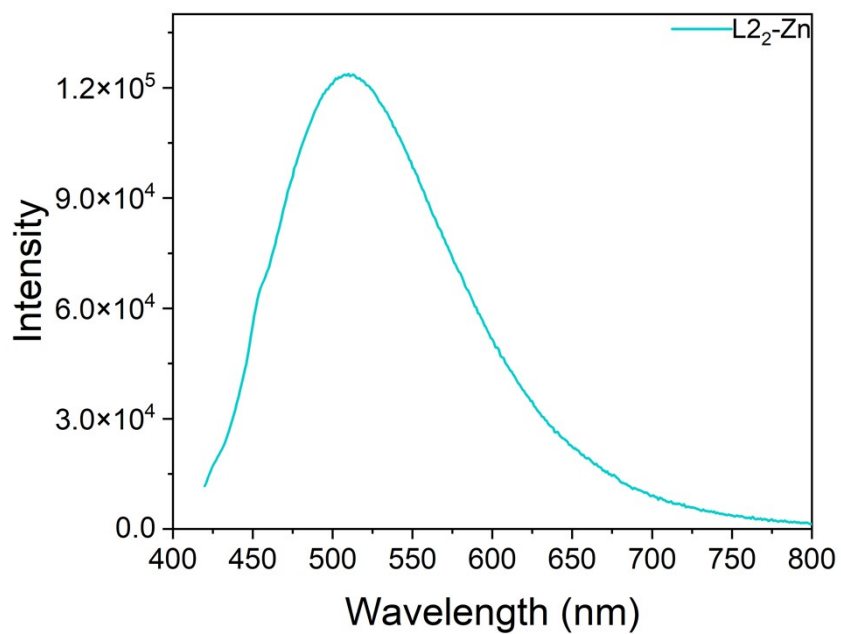

Fig. S60 Fluorescence spectra of complex **L<sub>2</sub>-Zn** ( $\lambda_{\text{ex}} = 400$  nm,  $c = 1 \times 10^{-5}$  M) in DMF.

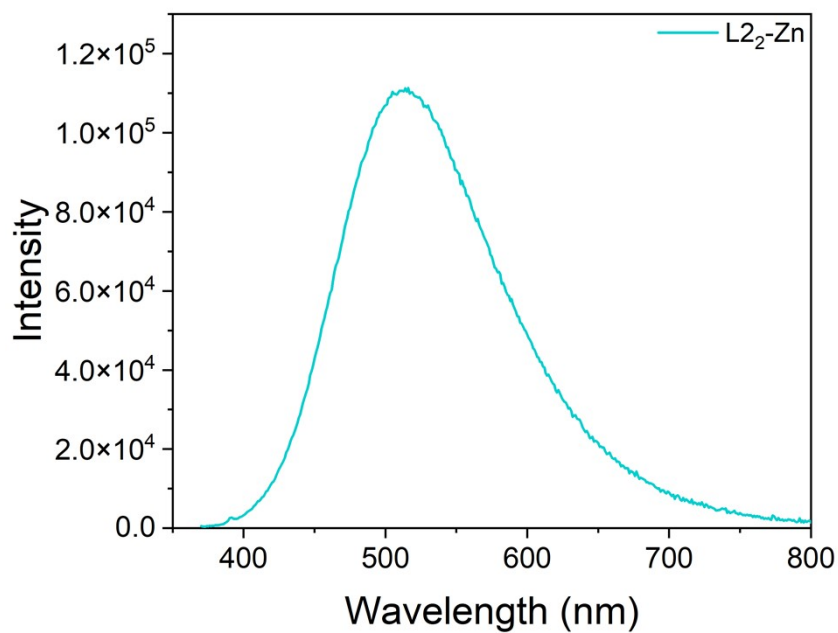

Fig. S61 Fluorescence spectra of complex **L2<sub>2</sub>-Zn** ( $\lambda_{\text{ex}} = 400 \text{ nm}$ ,  $c = 1 \times 10^{-5} \text{ M}$ ) in DMSO.

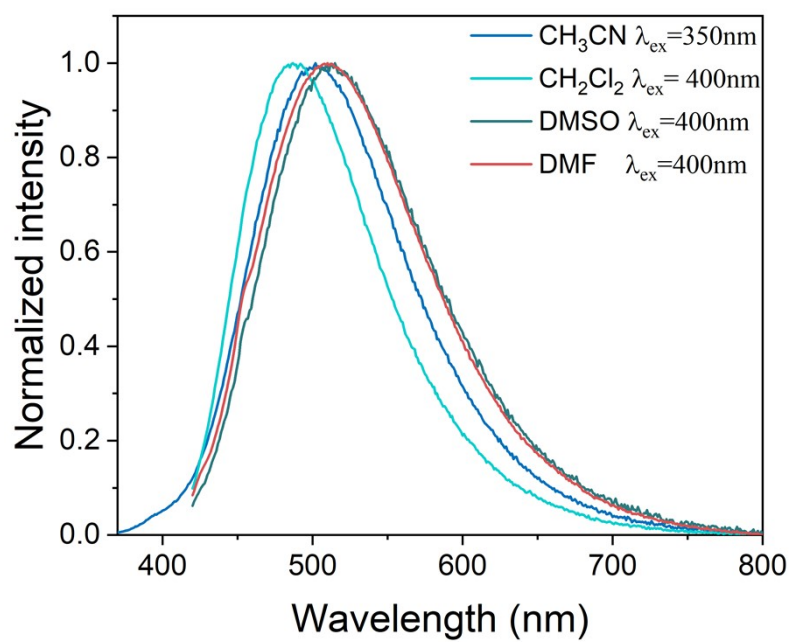

Fig. S62 Normalized fluorescence spectra of complex **L2<sub>2</sub>-Zn** ( $c = 1 \times 10^{-5} \text{ M}$ ) in  $\text{CH}_3\text{CN}/\text{CH}_2\text{Cl}_2/\text{DMSO}/\text{DMF}/\text{CH}_3\text{CN}$ .

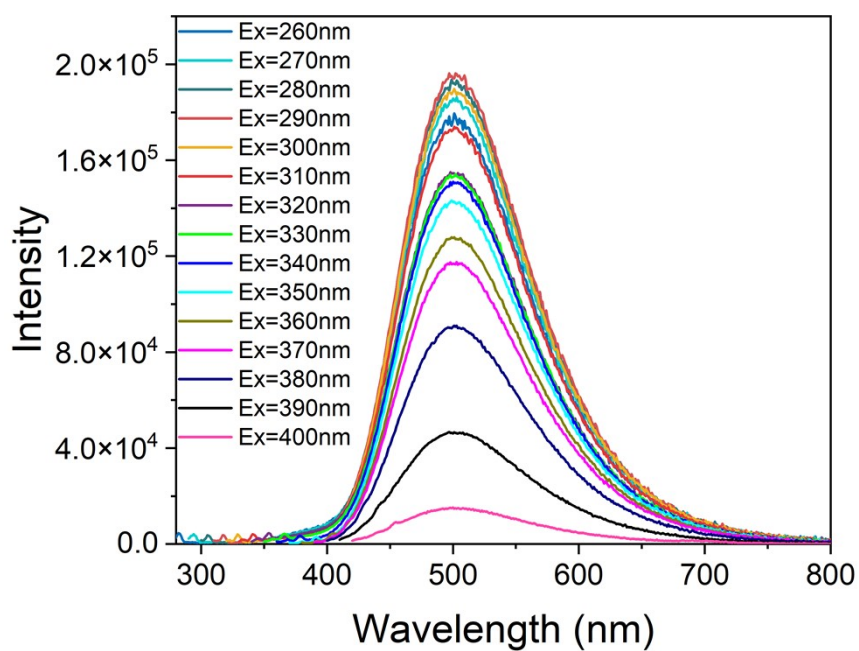

**Fig. S63** Fluorescence spectra of complex **L<sub>2</sub>-Zn** in CH<sub>3</sub>CN (Ex = 260 nm - 400 nm, c = 1 × 10<sup>-5</sup> M) in CH<sub>3</sub>CN.

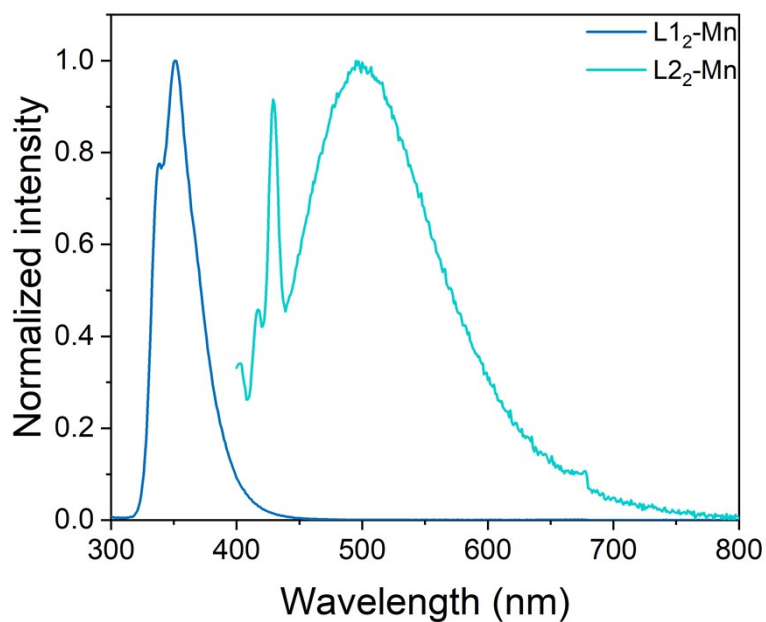

**Fig. S64** Normalized fluorescence spectra of complex **L<sub>12</sub>-Mn** ( $\lambda_{\text{ex}}$  = 280 nm, c = 1 × 10<sup>-5</sup> M) and **L<sub>22</sub>-Mn** ( $\lambda_{\text{ex}}$  = 380 nm, c = 1 × 10<sup>-5</sup> M) in CH<sub>3</sub>CN.

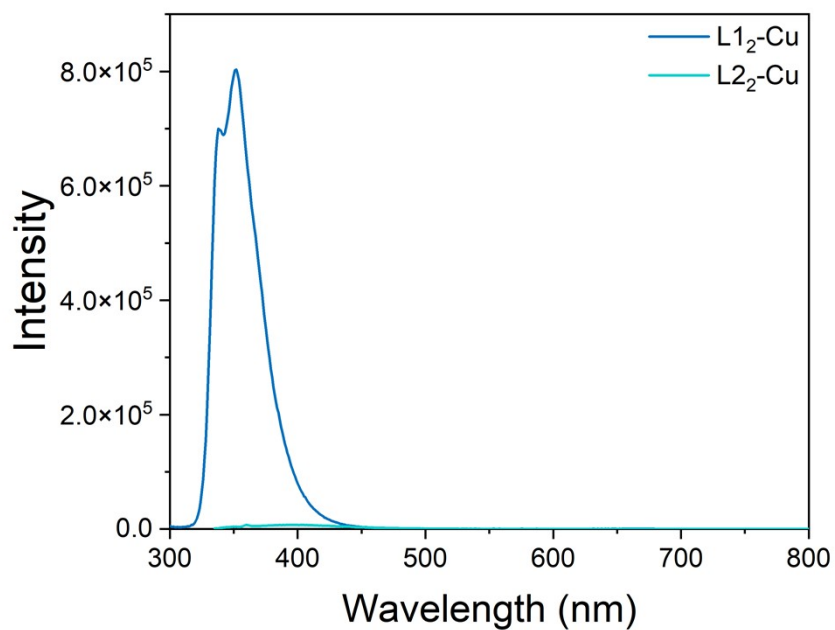

**Fig. S65** Fluorescence spectra of complex  $L1_2-Cu$  ( $\lambda_{ex} = 280$  nm,  $c = 1 \times 10^{-5}$  M) and  $L2_2-Cu$  ( $\lambda_{ex} = 300$  nm,  $c = 1 \times 10^{-5}$  M) in  $CH_3CN$ .

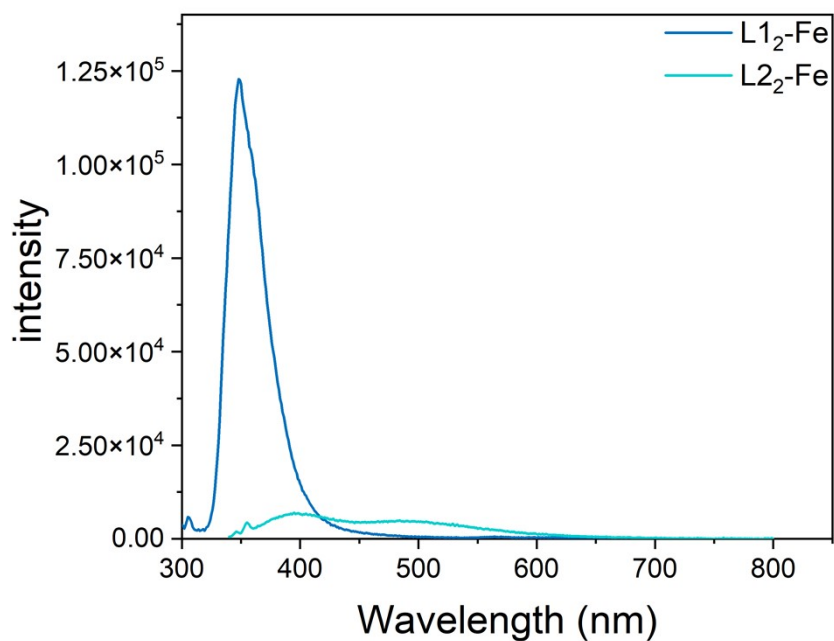

**Fig. S66** Fluorescence spectra of complex  $L1_2-Fe$  ( $\lambda_{ex} = 280$  nm,  $c = 1 \times 10^{-5}$  M) and  $L2_2-Fe$  ( $\lambda_{ex} = 300$  nm,  $c = 1 \times 10^{-5}$  M) in  $CH_3CN$ .

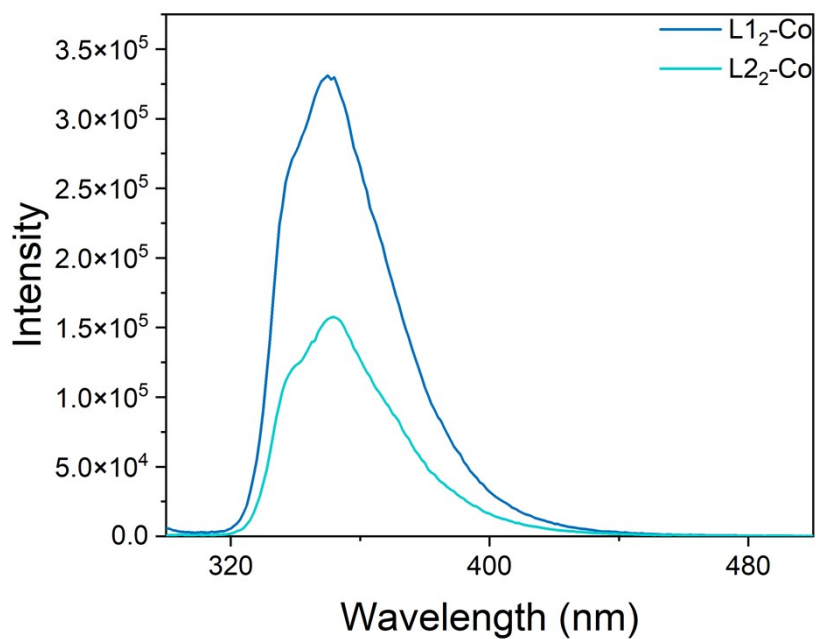

**Fig. S67** Fluorescence spectra of complex **L1<sub>2</sub>-Co** ( $\lambda_{\text{ex}} = 280 \text{ nm}$ ,  $c = 1 \times 10^{-5} \text{ M}$ ) and **L2<sub>2</sub>-Co** ( $\lambda_{\text{ex}} = 300 \text{ nm}$ ,  $c = 1 \times 10^{-5} \text{ M}$ ) in  $\text{CH}_3\text{CN}$ .

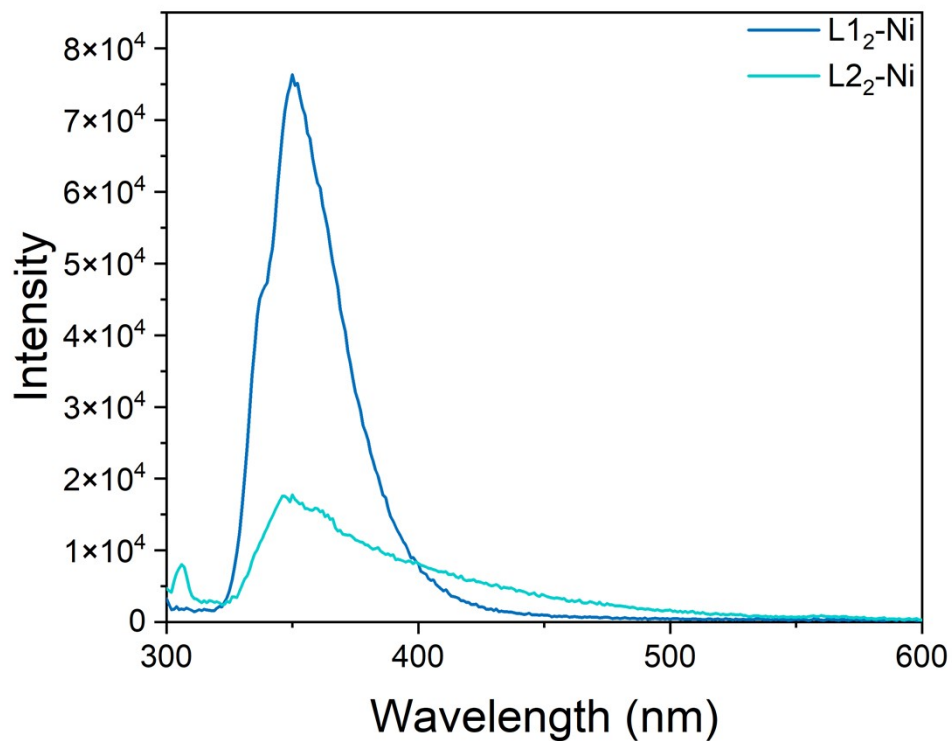

**Fig. S68** Fluorescence spectra of complex **L1<sub>2</sub>-Ni** ( $\lambda_{\text{ex}} = 280 \text{ nm}$ ,  $c = 1 \times 10^{-5} \text{ M}$ ) and **L2<sub>2</sub>-Ni** ( $\lambda_{\text{ex}} = 300 \text{ nm}$ ,  $c = 1 \times 10^{-5} \text{ M}$ ) in  $\text{CH}_3\text{CN}$ .

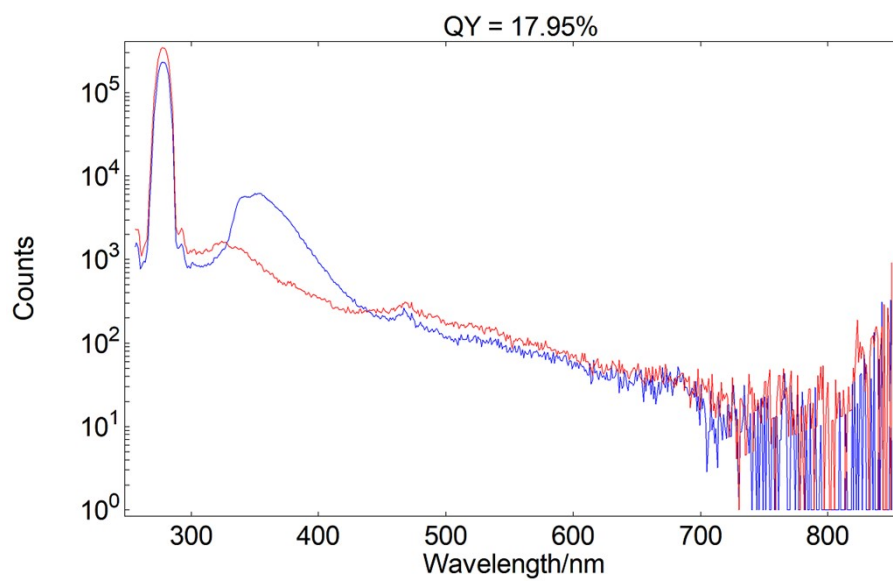

Fig. S69 Absolute fluorescence quantum yield of ligand L1 ( $\lambda_{\text{ex}} = 280$  nm,  $c = 1 \times 10^{-5}$  M) in  $\text{CH}_2\text{Cl}_2$ .

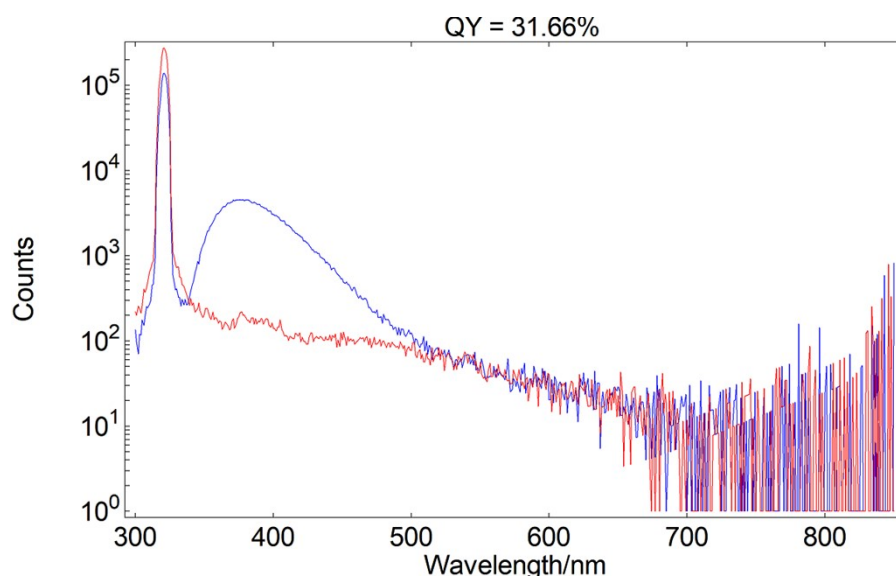

Fig. S70 Absolute fluorescence quantum yield of ligand L2 ( $\lambda_{\text{ex}} = 280$  nm,  $c = 1 \times 10^{-5}$  M) in  $\text{CH}_3\text{Cl}_2$ .

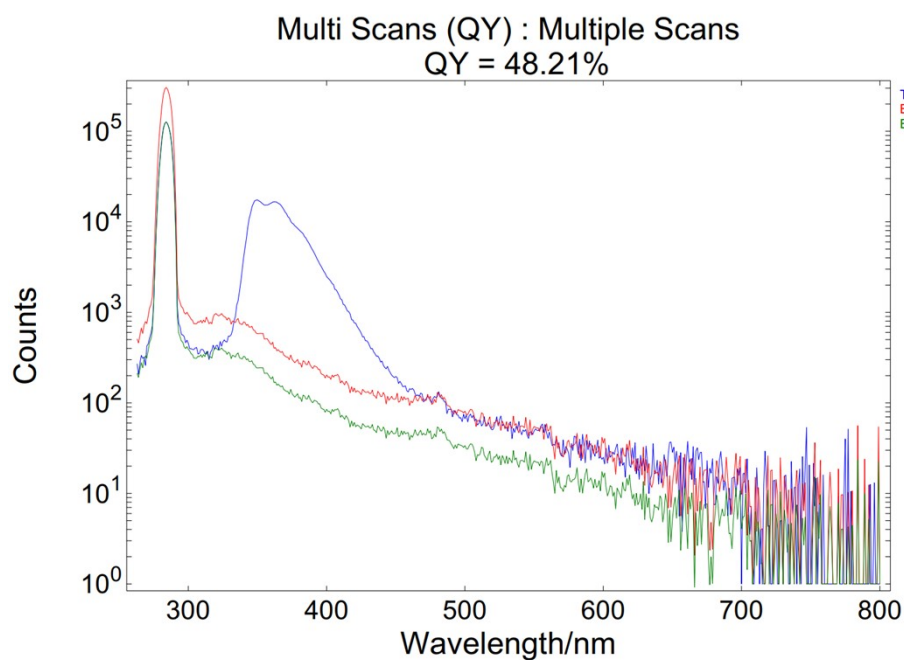

**Fig. S71** Absolute fluorescence quantum yield of complex **L1<sub>2</sub>-Zn** ( $\lambda_{\text{ex}} = 280 \text{ nm}$ ,  $c = 1 \times 10^{-5} \text{ M}$ ) in  $\text{CH}_3\text{CN}$ .

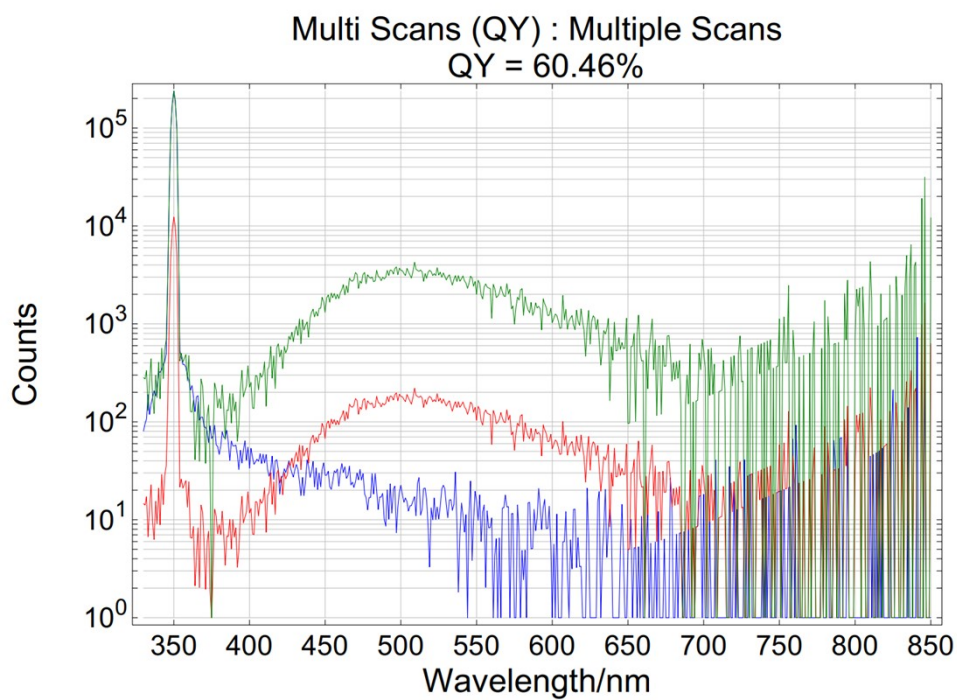

**Fig. S72** Absolute fluorescence quantum yield of complex **L2<sub>2</sub>-Zn** ( $\lambda_{\text{ex}} = 350 \text{ nm}$ ,  $c = 1 \times 10^{-5} \text{ M}$ ) in  $\text{CH}_3\text{CN}$ .



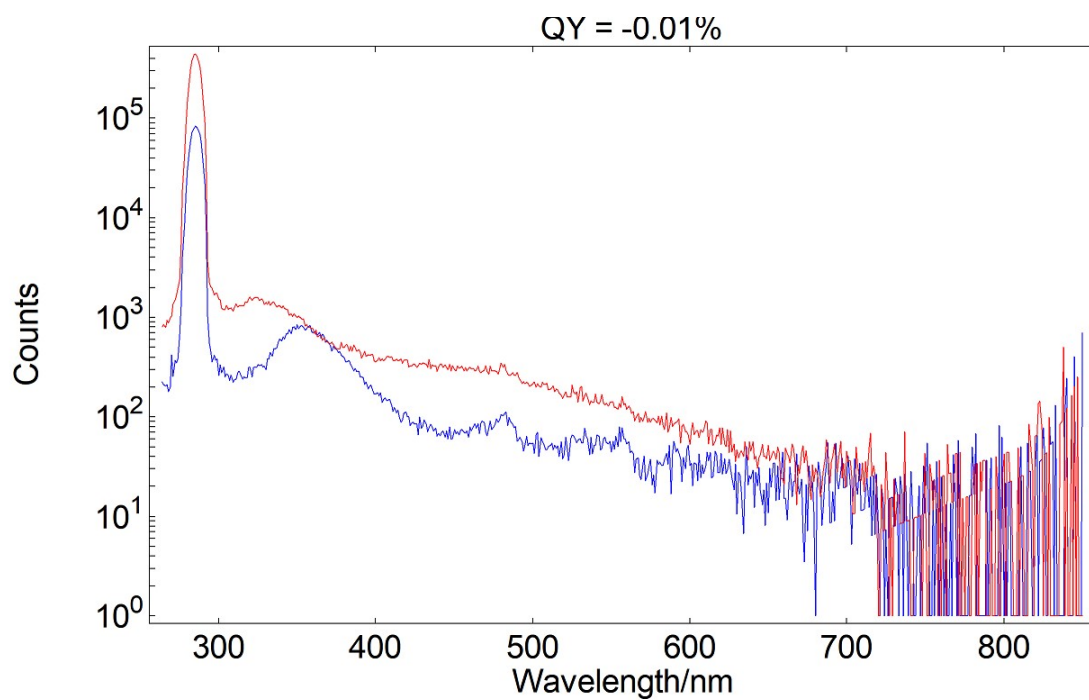

Fig. S73 Absolute fluorescence quantum yield of complex **L1<sub>2</sub>-Co** ( $\lambda_{\text{ex}} = 284 \text{ nm}$ ,  $c = 1 \times 10^{-5} \text{ M}$ ) in  $\text{CH}_3\text{CN}$ .

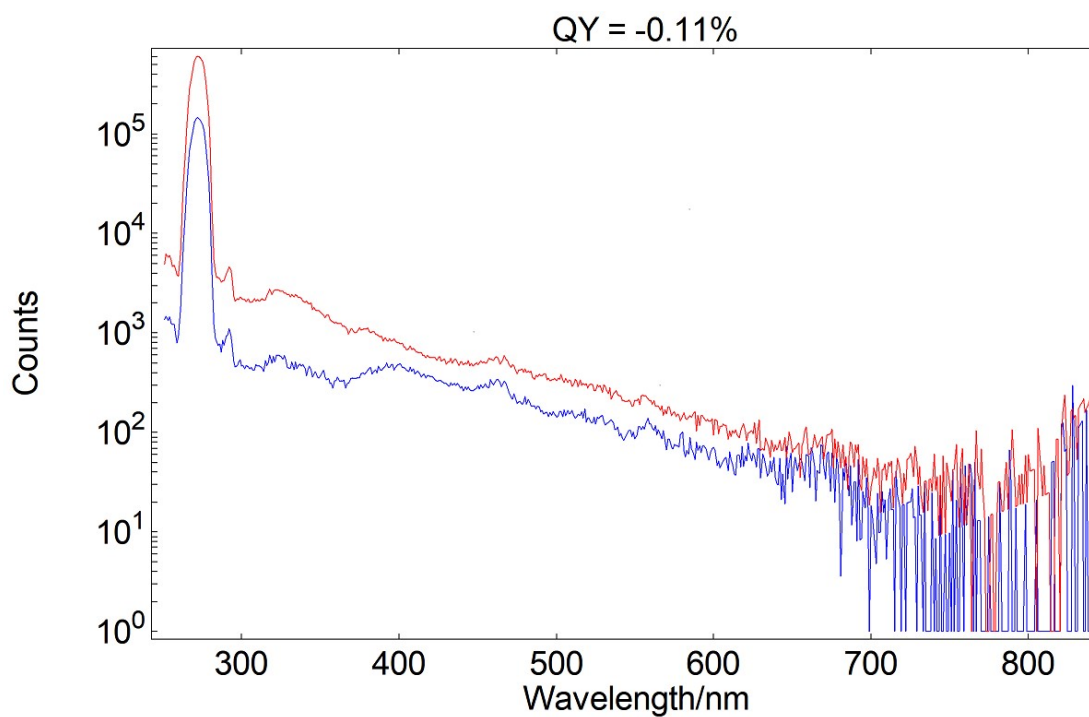

Fig. S74 Absolute fluorescence quantum yield of complex **L2<sub>2</sub>-Co** ( $\lambda_{\text{ex}} = 271 \text{ nm}$ ,  $c = 1 \times 10^{-5} \text{ M}$ ) in  $\text{CH}_3\text{CN}$ .

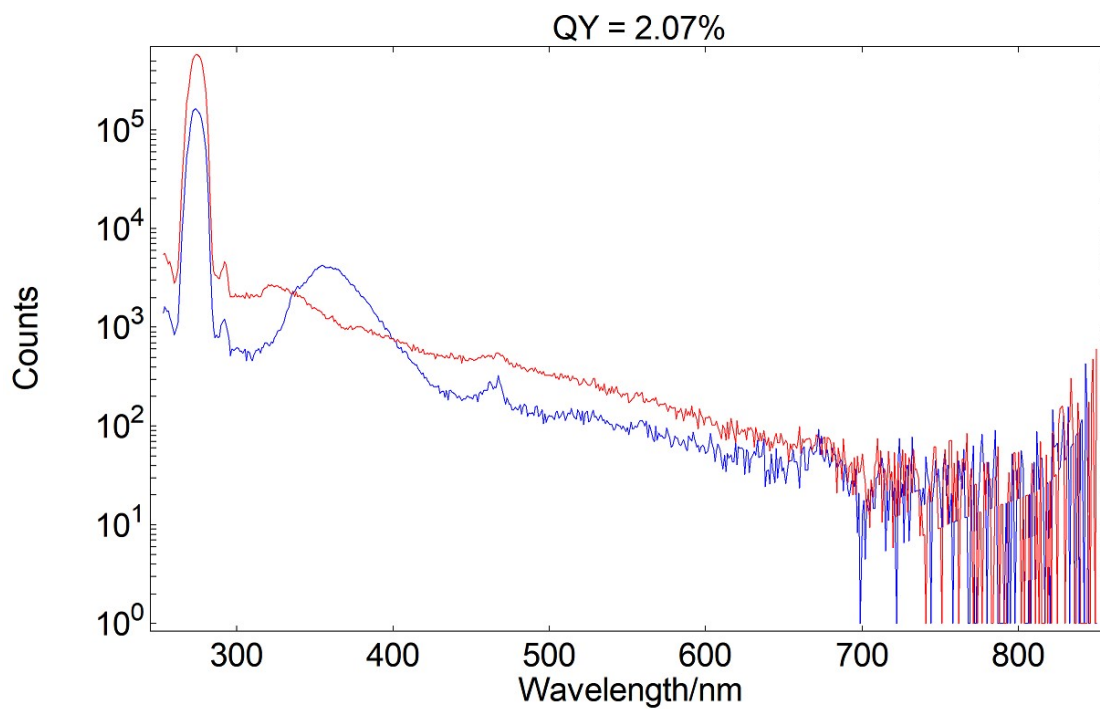

Fig. S75 Absolute fluorescence quantum yield of complex **L1<sub>2</sub>-Cu** ( $\lambda_{\text{ex}} = 273$  nm,  $c = 1 \times 10^{-5}$  M) in  $\text{CH}_3\text{CN}$ .

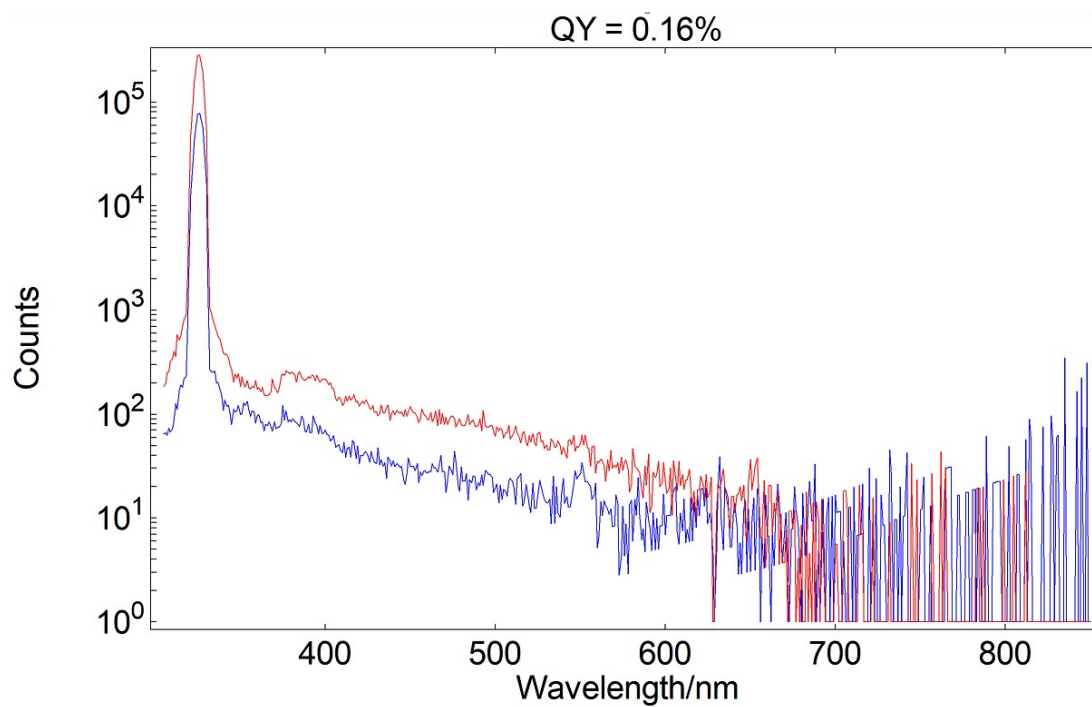

Fig. S76 Absolute fluorescence quantum yield of complex **L2<sub>2</sub>-Cu** ( $\lambda_{\text{ex}} = 271$  nm,  $c = 1 \times 10^{-5}$  M) in  $\text{CH}_3\text{CN}$ .

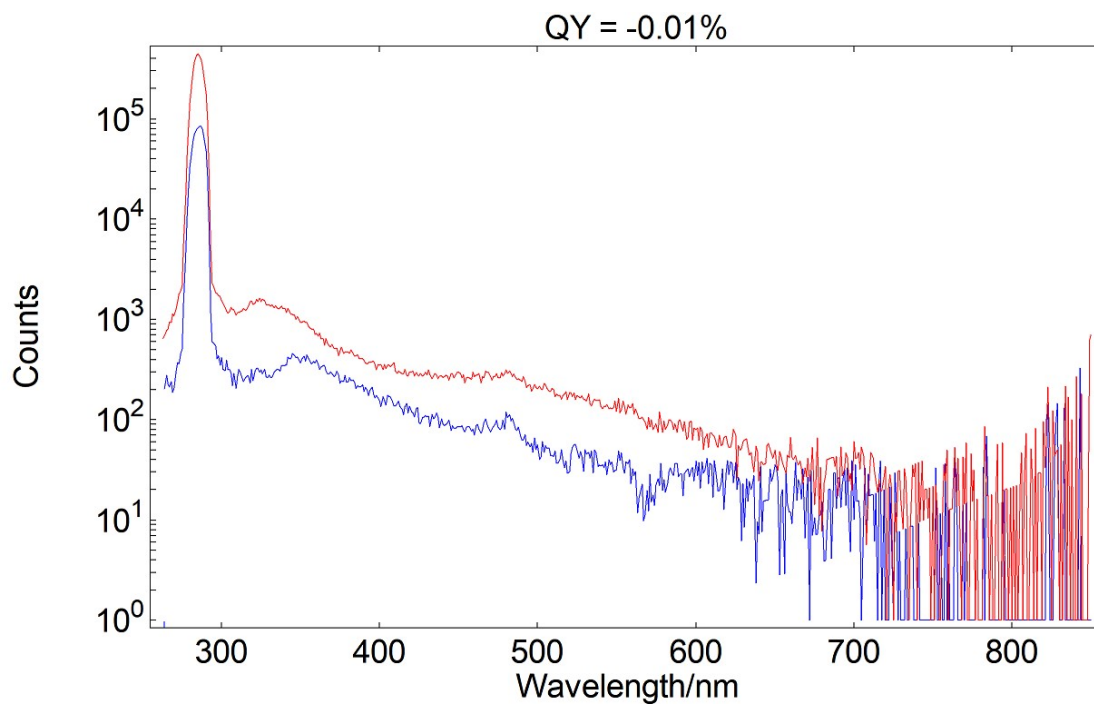

Fig. S77 Absolute fluorescence quantum yield of complex **L1<sub>2</sub>-Fe** ( $\lambda_{\text{ex}} = 284$  nm,  $c = 1 \times 10^{-5}$  M) in  $\text{CH}_3\text{CN}$ .

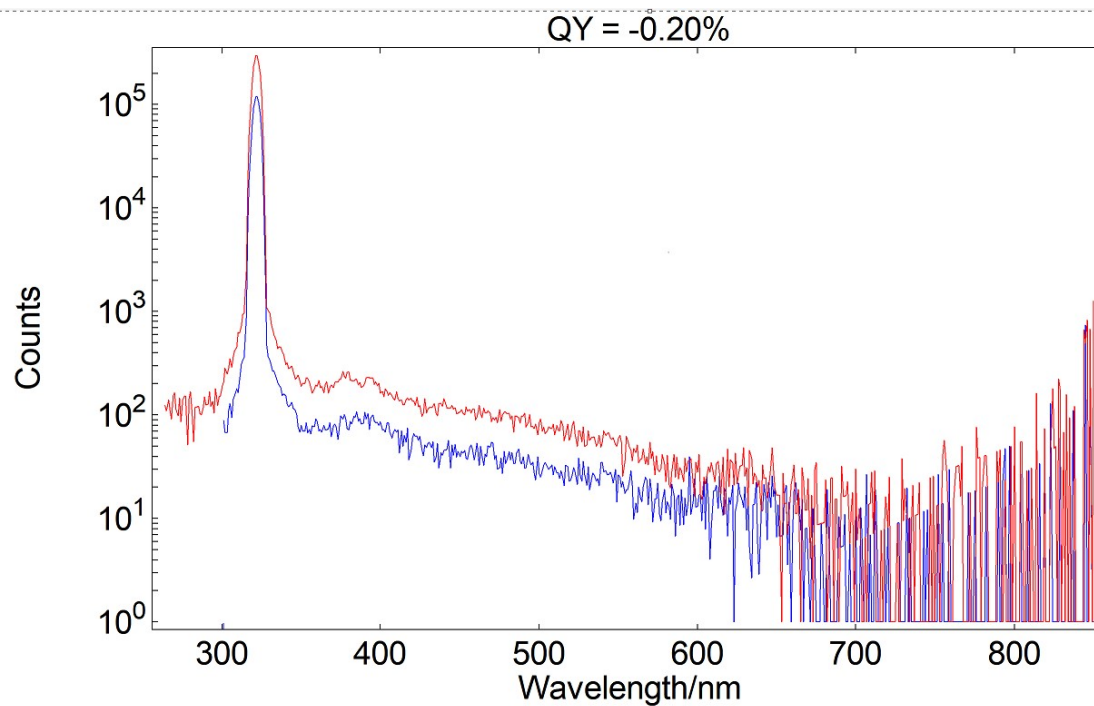

Fig. S78 Absolute fluorescence quantum yield of complex **L2<sub>2</sub>-Fe** ( $\lambda_{\text{ex}} = 321$  nm,  $c = 1 \times 10^{-5}$  M) in  $\text{CH}_3\text{CN}$ .

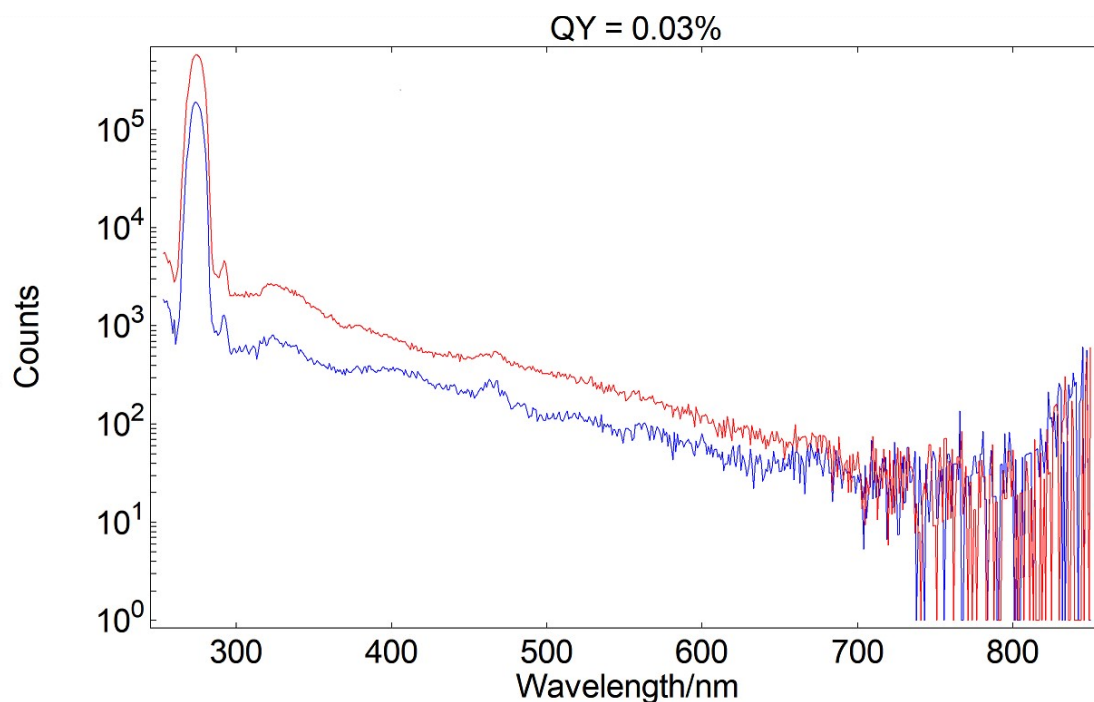

Fig. S79 Absolute fluorescence quantum yield of complex **L1<sub>2</sub>-Ni** ( $\lambda_{\text{ex}} = 273$  nm,  $c = 1 \times 10^{-5}$  M) in  $\text{CH}_3\text{CN}$ .

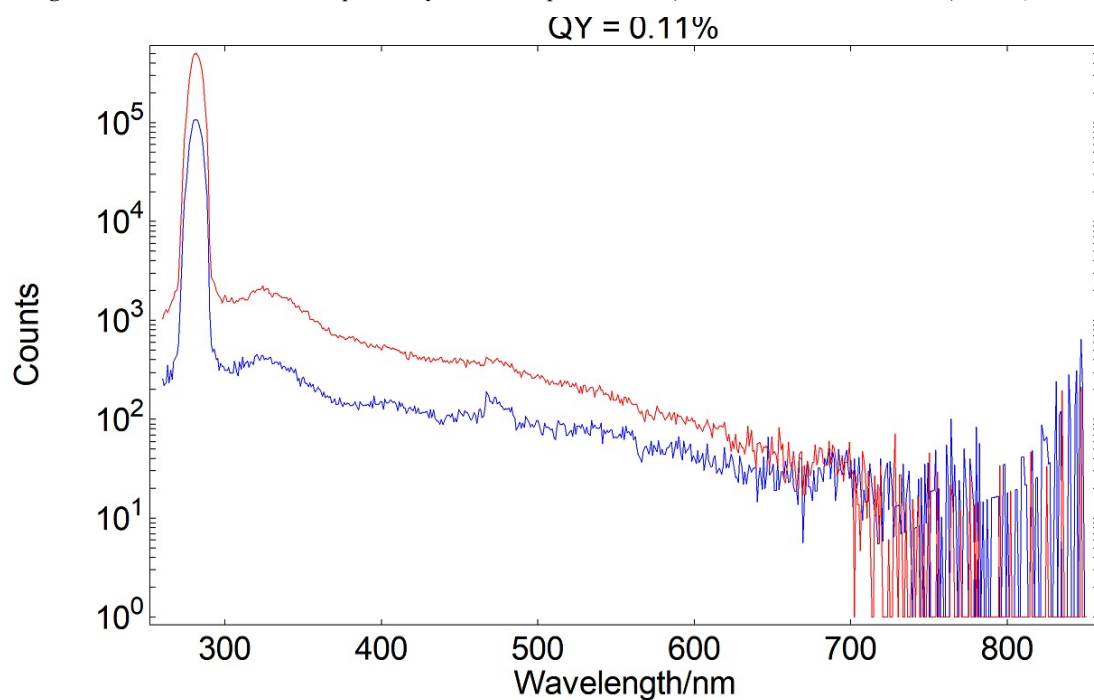

Fig. S80 Absolute fluorescence quantum yield of complex **L1<sub>2</sub>-Ni** ( $\lambda_{\text{ex}} = 280$  nm,  $c = 1 \times 10^{-5}$  M) in  $\text{CH}_3\text{CN}$ .

**Table S11** Photophysical properties of ligand **L1**, **L2** and complex **L1<sub>2</sub>-Zn**, **L2<sub>2</sub>-Zn**

| Compound            | Absorption <sup>a</sup>     |                                                                  | Luminescence                      |                                    |                                  |                                   | $\phi_{\text{m}}(\%)$ <sup>a,b</sup> | solvent                  |
|---------------------|-----------------------------|------------------------------------------------------------------|-----------------------------------|------------------------------------|----------------------------------|-----------------------------------|--------------------------------------|--------------------------|
|                     | $\lambda_{\text{max}}$ (nm) | $\epsilon_{\text{max}}$ ( $\text{M}^{-1} \cdot \text{cm}^{-1}$ ) | $\lambda_{\text{ex}}$ (nm) liquid | $\lambda_{\text{max}}$ (nm) Liquid | $\lambda_{\text{ex}}$ (nm) solid | $\lambda_{\text{max}}$ (nm) solid |                                      |                          |
| L1                  | 280                         | 23726                                                            | 281                               | 340                                | 340                              | 393                               | 17.95                                | $\text{CH}_2\text{Cl}_2$ |
| L2                  | 261                         | 41751                                                            | 325                               | 373                                | 420                              | 450                               | 31.66                                | $\text{CH}_2\text{Cl}_2$ |
| L1 <sub>2</sub> -Zn | 285                         | 69500                                                            | 300                               | 350                                | 352                              | 468                               | 48.21                                | $\text{CH}_3\text{CN}$   |
| L2 <sub>2</sub> -Zn | 285                         | 62946                                                            | 350                               | 500                                | 403                              | 403                               | 60.46                                | $\text{CH}_3\text{CN}$   |

<sup>a</sup> Air-equilibrated acetonitrile solution in 298K. <sup>b</sup> excitation at 350 nm and uncertainty over the measures is estimated to be 20%.

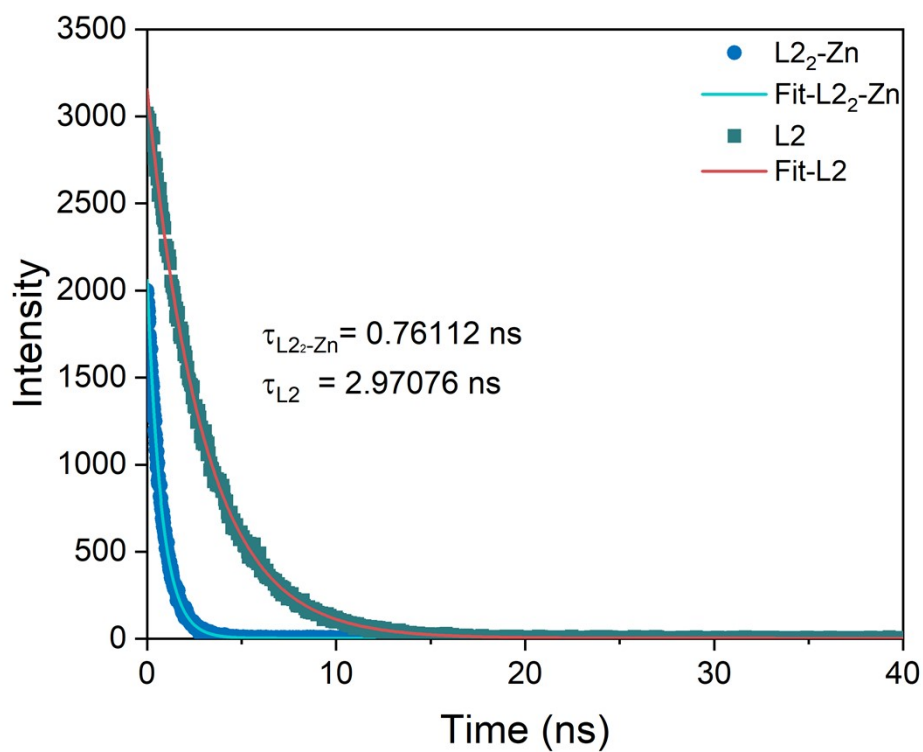

**Fig. S81** Time-resolved fluorescence decay curves **L<sub>2</sub>-Zn** ( $\lambda_{\text{ex}} = 375 \text{ nm}$   $c = 1 \times 10^{-5} \text{ M}$ ) and **L<sub>2</sub>** ( $\lambda_{\text{ex}} = 290 \text{ nm}$ ,  $c = 1 \times 10^{-5} \text{ M}$ ) of persistent emission of in CH<sub>3</sub>CN.

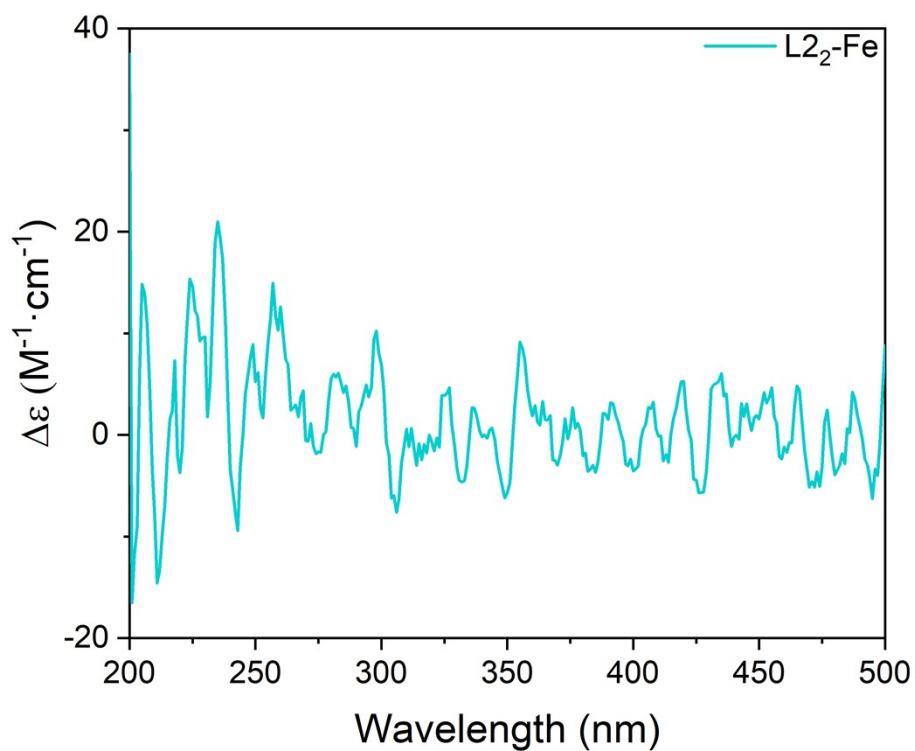

Fig. S82 ECD spectra of L<sub>2</sub>-Fe ( $c = 1 \times 10^{-5}$  M) in CH<sub>3</sub>CN.

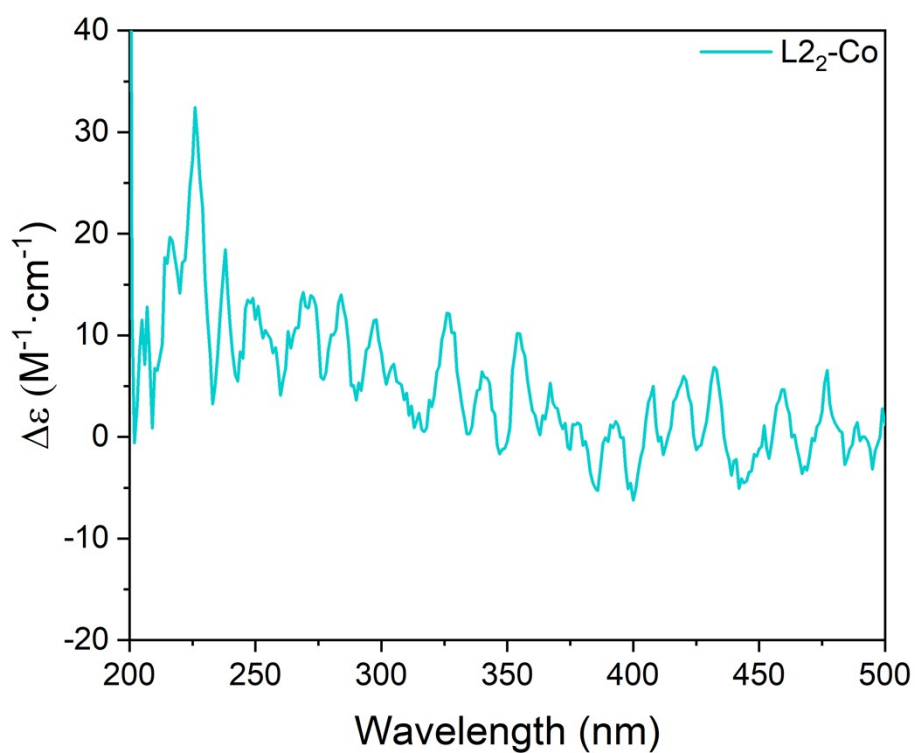

Fig. S83 ECD spectra of L<sub>2</sub>-Co ( $c = 1 \times 10^{-5}$  M) in CH<sub>3</sub>CN.

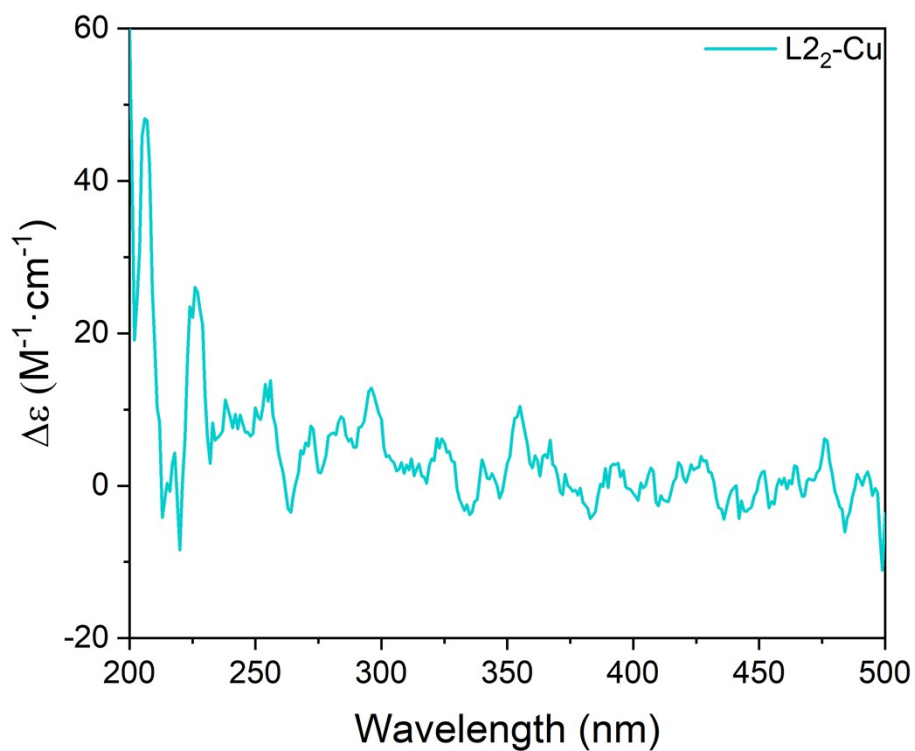

Fig. S84 ECD spectra of L<sub>2</sub>-Cu ( $c = 1 \times 10^{-5}$  M) in CH<sub>3</sub>CN.

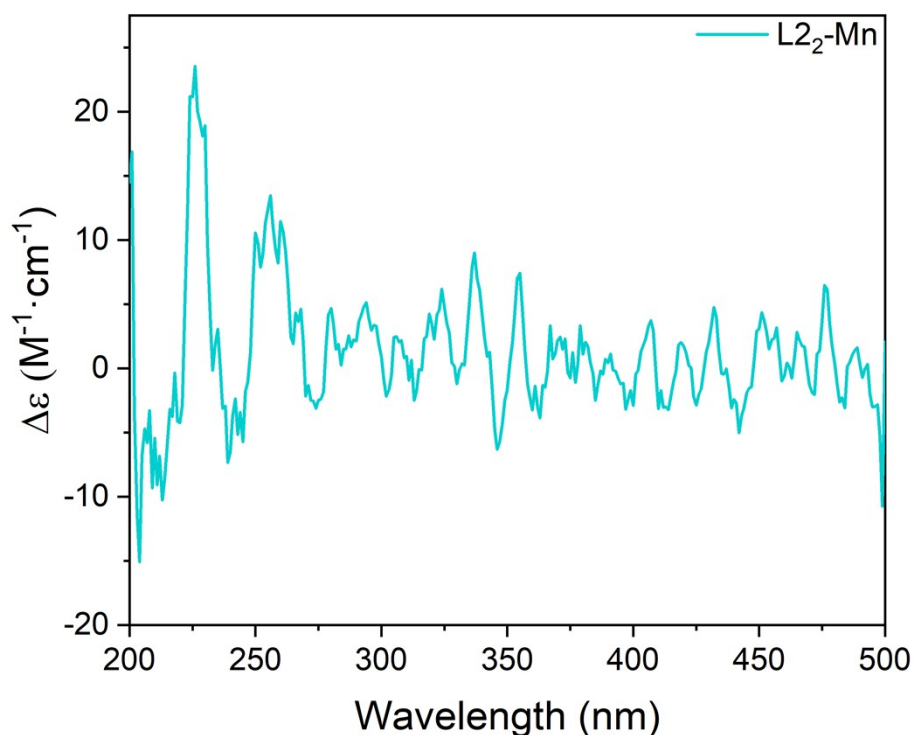

Fig. S85 ECD spectra of L<sub>2</sub>-Mn ( $c = 1 \times 10^{-5}$  M) in CH<sub>3</sub>CN.

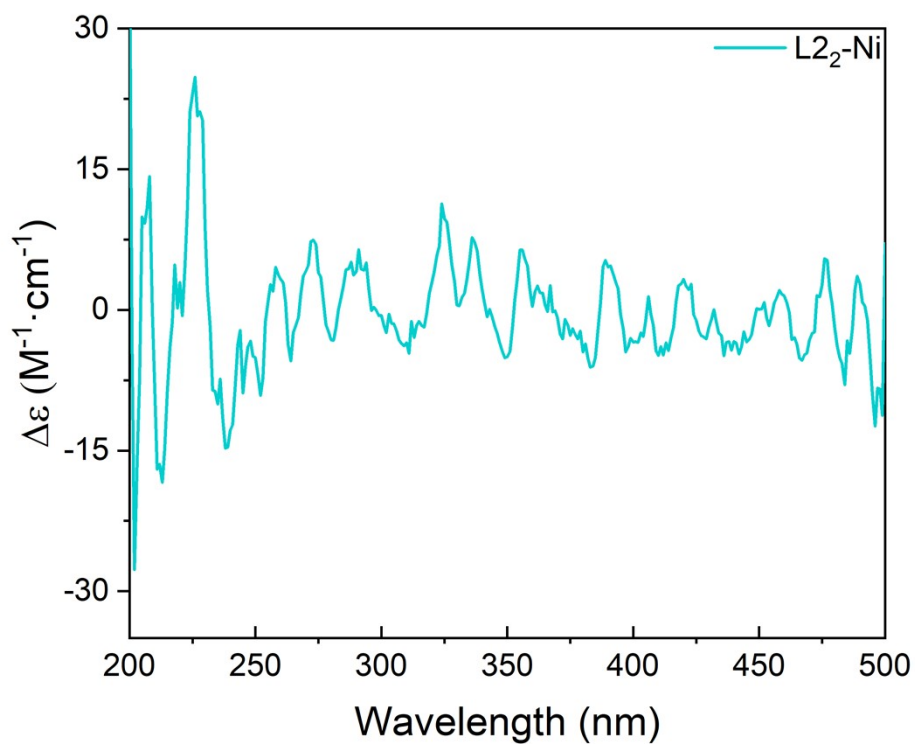

Fig. S86 ECD spectra of L2<sub>2</sub>-Ni ( $c = 1 \times 10^{-5}$  M) in CH<sub>3</sub>CN.

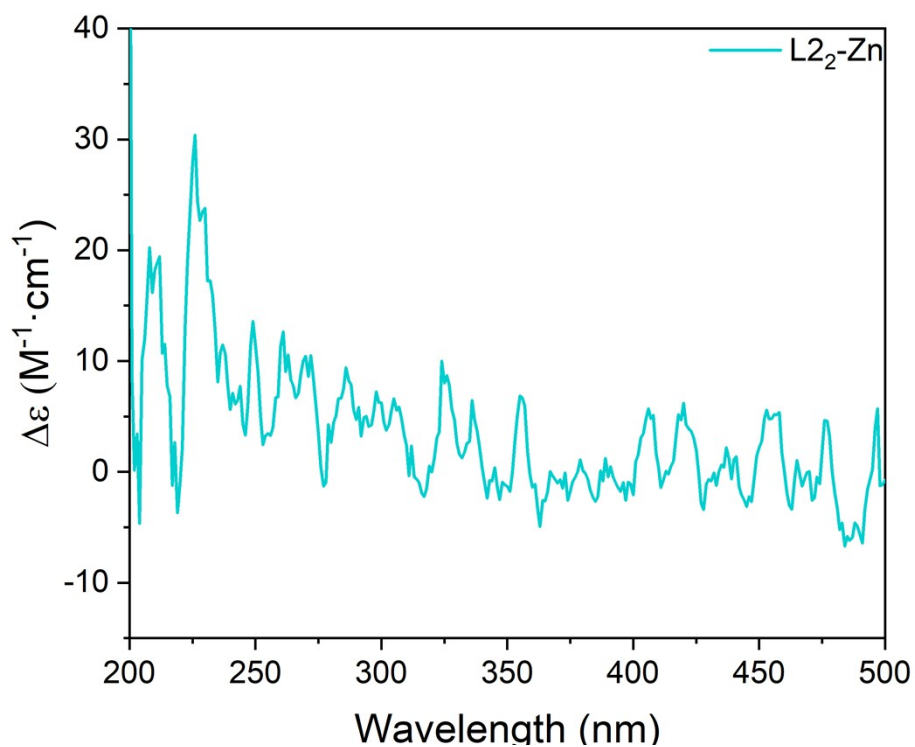

Fig. S87 ECD spectra of L2<sub>2</sub>-Zn in ( $c = 1 \times 10^{-5}$  M) CH<sub>3</sub>CN.



## Density Functional Theory (DFT) Calculation

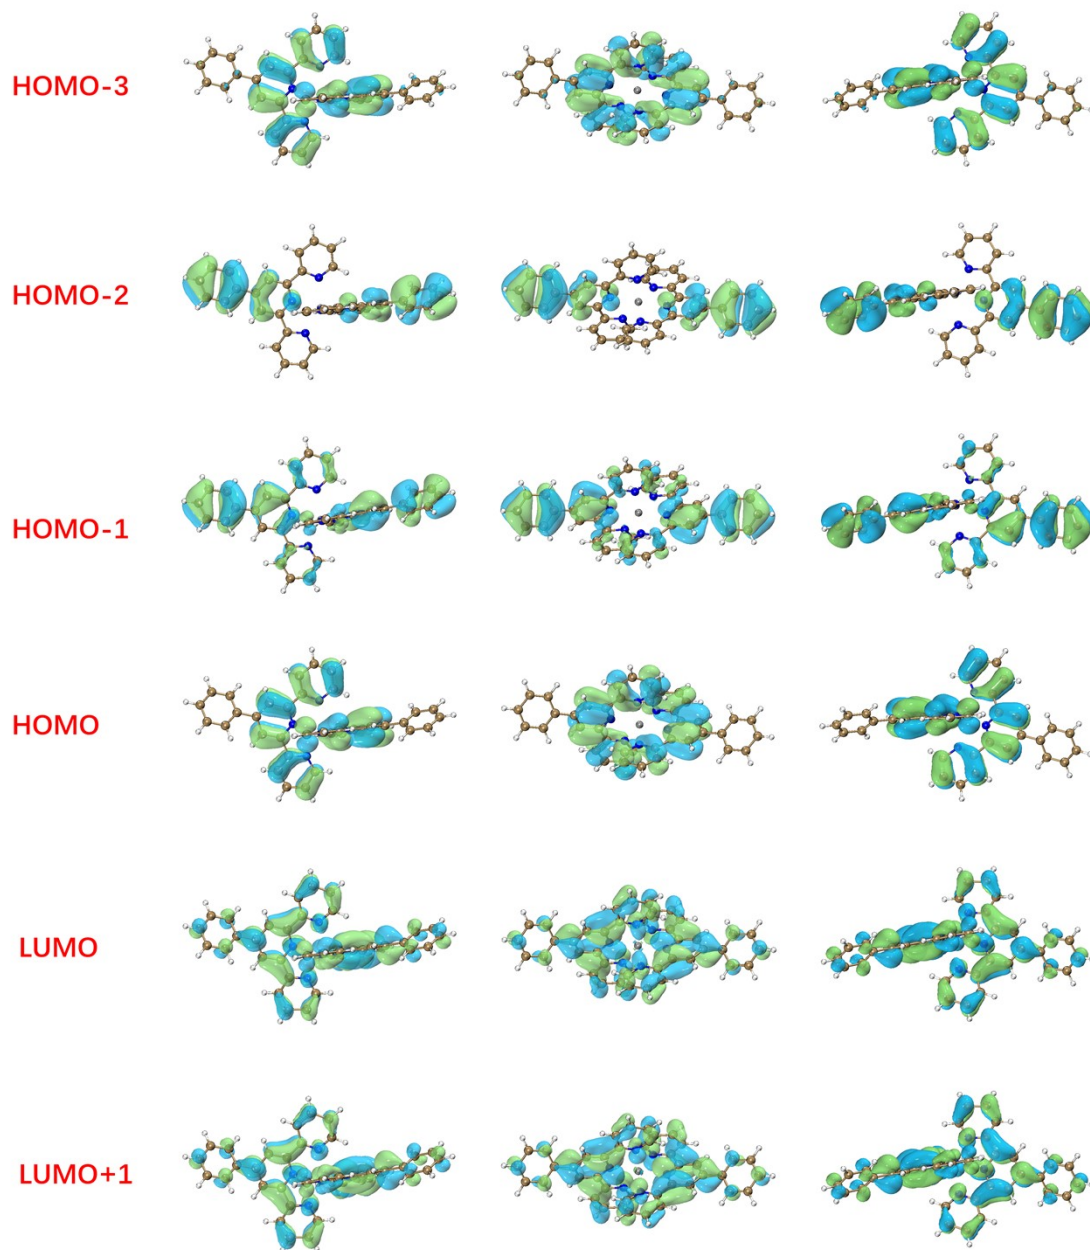

Fig. S88 Frontier molecular orbitals of L1<sub>2</sub>-Zn.

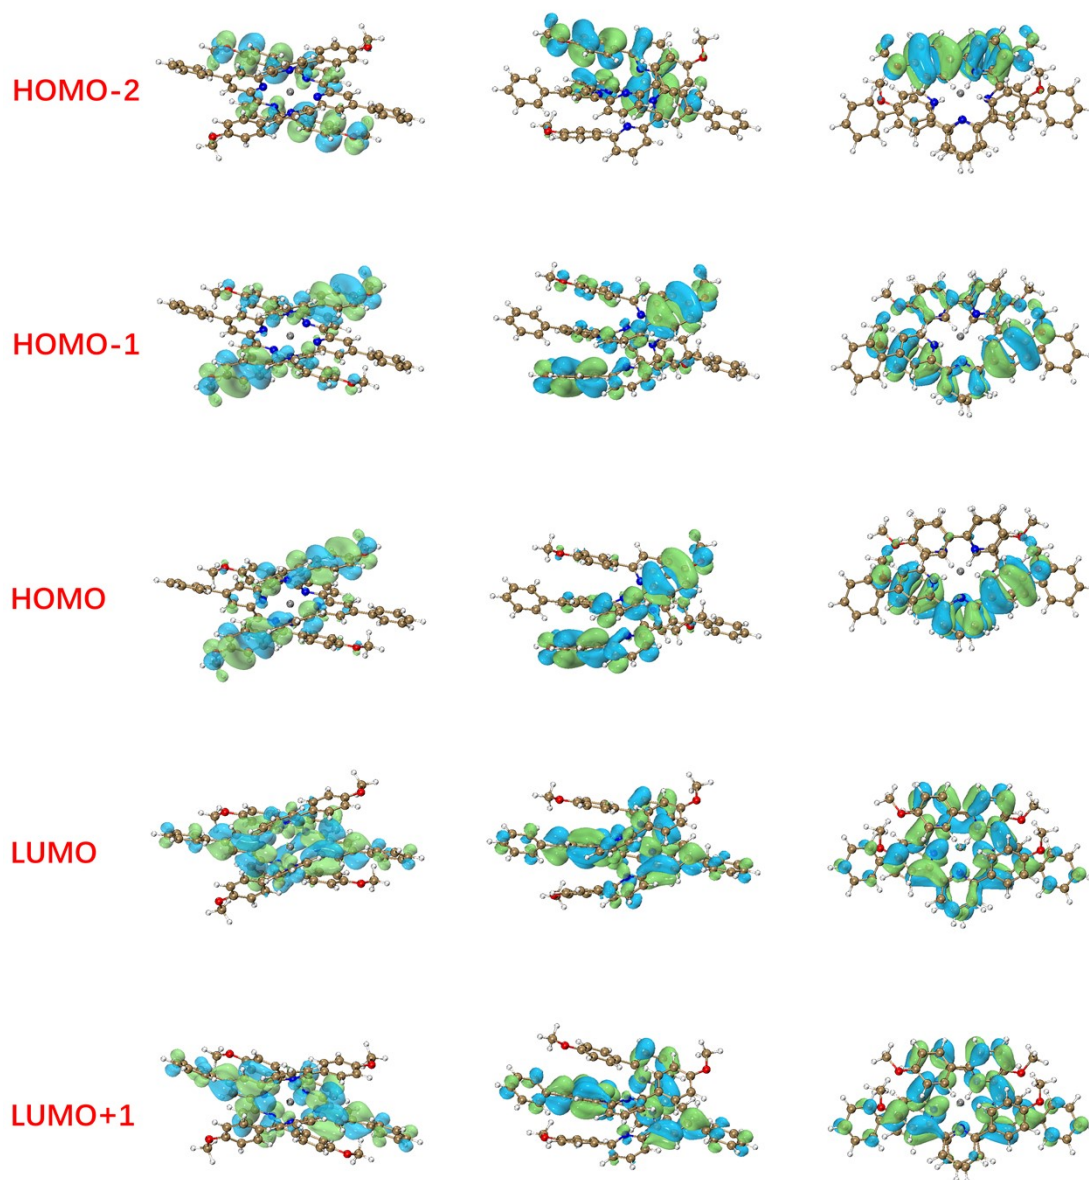

**Fig. S89** Frontier molecular orbitals of  $L2-Zn$ .

**Table S12** The calculated energy levels, oscillator strengths ( $f$ ), and molecular orbital transition analyses of **L1<sub>2</sub>-Zn** and **L2<sub>2</sub>-Zn** in CH<sub>3</sub>CN.

|                          | State | $\lambda$ (nm) | $f$    | Assignments             |
|--------------------------|-------|----------------|--------|-------------------------|
| <b>L1<sub>2</sub>-Zn</b> | S0→S1 | 312            | 0.2575 | HOMO → LUMO (55.3%)     |
|                          |       |                |        | HOMO-3 → LUMO+1 (25.7%) |
|                          | S0→S2 | 311            | 0.3257 | HOMO → LUMO+1 (43.3%)   |
|                          |       |                |        | HOMO-3 → LUMO (32.6%)   |
|                          | S0→S3 | 297            | 0.8845 | HOMO-2 → LUMO (54.9%)   |
|                          |       |                |        | HOMO-1 → LUMO+1 (30.9%) |
| <b>L2<sub>2</sub>-Zn</b> | S0→S1 | 401            | 0.0038 | HOMO → LUMO (92.0%)     |
|                          |       |                |        | -                       |
|                          | S0→S2 | 387            | 0.0011 | HOMO-1 → LUMO (63.3%)   |
|                          |       |                |        | HOMO → LUMO+1 (33.3%)   |
|                          | S0→S3 | 382            | 0.0056 | HOMO-2 → LUMO (93.3%)   |
|                          |       |                |        | -                       |

**Table S13** Experimental and calculated optical characteristics for **L1<sub>2</sub>-Zn** and **L2<sub>2</sub>-Zn** in CH<sub>3</sub>CN.

|                          | Absorption S <sub>0</sub> →S <sub>1</sub> |                              |        | Emission S <sub>1</sub> →S <sub>0</sub> |                              |        |
|--------------------------|-------------------------------------------|------------------------------|--------|-----------------------------------------|------------------------------|--------|
|                          | $\lambda_{\text{exp}}$ (nm)               | $\lambda_{\text{calc}}$ (nm) | $f$    | $\lambda_{\text{exp}}$ (nm)             | $\lambda_{\text{calc}}$ (nm) | $f$    |
| <b>L1<sub>2</sub>-Zn</b> | 338                                       | 312                          | 0.2575 | 349                                     | 352                          | 0.5931 |
| <b>L2<sub>2</sub>-Zn</b> | 372                                       | 401                          | 0.0038 | 500                                     | 496                          | 0.0036 |

## Reference

- [1] G. W. T. M. J. Frisch, H. B. Schlegel, G. E. Scuseria, M. A. Robb, J. R. Cheeseman, G. Scalmani, V. Barone, G. A. Petersson, H. Nakatsuji, X. Li, M. Caricato, A. Marenich, J. Bloino, B. G. Janesko, R. Gomperts, B. Mennucci, H. P. Hratchian, J. V. Ortiz, A. F. Izmaylov, J. L. Sonnenberg, D. Williams-Young, F. Ding, F. Lipparini, F. Egidi, J. Goings, B. Peng, A. Petrone, T. Henderson, D. Ranasinghe, V. G. Zakrzewski, J. Gao, N. Rega, G. Zheng, W. Liang, M. Hada, M. Ehara, K. Toyota, R. Fukuda, J. Hasegawa, M. Ishida, T. Nakajima, Y. Honda, O. Kitao, H. Nakai, T. Vreven, K. Throssell, J. A. Montgomery, Jr., J. E. Peralta, F. Ogliaro, M. Bearpark, J. J. Heyd, E. Brothers, K. N. Kudin, V. N. Staroverov, T. Keith, R. Kobayashi, J. Normand, K. Raghavachari, A. Rendell, J. C. Burant, S. S. Iyengar, J. Tomasi, M. Cossi, J. M. Millam, M. Klene, C. Adamo, R. Cammi, J. W. Ochterski, R. L. Martin, K. Morokuma, O. Farkas, J. B. Foresman, and D. J. Fox, Gaussian 09, Revision D.01; Gaussian, Inc.: Wallingford CT, 2013.
- [2] S. Grimme, J. Antony, S. Ehrlich, H. Krieg, *The Journal of chemical physics* 2010, 132, 154104.
- [3] Tian Lu, Feiwu Chen, *J. Comput. Chem.*, 2012, 33, 580-592.
- [4] Humphrey, W., Dalke, A. and Schulten, K., "VMD - Visual Molecular Dynamics" *J. Molec. Graphics* 1996, 14.1, 33-38.
- [5]. McMurtrie, J.; Dance, I., Crystal packing in metal complexes of 4'-phenylterpyridine and related ligands: occurrence of the 2D and 1D terpy embrace arrays. *CrystEngComm* 2009, 11 (6).
- [6]. Zhang, Y.; Zhou, P.; Liang, B.; Huang, L.; Zhou, Y.; Ma, Z., Effects of counterions of colorful sandwich-type zinc(II) 4'-phenyl-terpyridine compounds on photoluminescent and thermal properties. *Journal of Molecular Structure* 2017, 1146, 504-511.
- [7]. Brauchli, S. Y.; Constable, E. C.; Harris, K.; Haussinger, D.; Housecroft, C. E.; Rosel, P. J.; Zampese, J. A., Towards catenanes using pi-stacking interactions and their influence on the spin-state of a bis(2,2':6',2''terpyridine)iron(II) domain. *Dalton Trans* 2010, 39 (44), 10739-48.
- [8]. Ketkaew, R.; Tantirungrotechai, Y.; Harding, P.; Chastanet, G.; Guionneau, P.; Marchivie, M.; Harding, D. J., OctaDist: a tool for calculating distortion parameters in spin crossover and coordination complexes. *Dalton Trans* 2021, 50 (3), 1086-1096.
